# Supplementary material
Source: publisher figshare collection journal article supplement (https://tandf.figshare.com/articles/dataset/_/7936895)
Supplement: Supplementary file [file 1]

## *Supplementary Material*

### **Identification and characterization of a novel rodent bocavirus from different rodent species in China**

Chi Zhang<sup>1</sup>, Fenglin Song<sup>1</sup>, Leshan Xiu<sup>1</sup>, Yang Liu, Jian Yang, Lisi Yao<sup>2</sup>,  
Junping Peng<sup>2</sup>

<sup>1</sup>These authors contributed equally to this article.

<sup>2</sup>These authors are both corresponding authors.

Correspondence:

Junping Peng, pengjp@hotmail.com

Lisi Yao, yaolisi@hotmail.com

Supplementary information

Figure S5, Alignments of nucleotide sequences of 460bp partial VP1  
among different isolates of RoBoV.

[illegible]

15: 23666RF  
TGAATCTATACAGCTGTCTACTTTCTCAACAAATGACTGGCAACGGCTATCTAAACAACTACAAAATATGGCGGGCGGTCTAAAGATGAGAGGTGCAGCTATATACAACTCTGCAAAATAAAAGCAGGTGGTAAAACTAGGAGACAGACACGTTGTACAAACAAAGCATCTACACAGCAGGCTGACAGCTCATGTGTGA
