# Supplementary material
Source: publisher figshare collection journal article supplement (https://tandf.figshare.com/articles/dataset/_/7936895)
Supplement: Supplementary file [file 1]

## *Supplementary Material*

### **Identification and characterization of a novel rodent bocavirus from different rodent species in China**

Chi Zhang<sup>1</sup>, Fenglin Song<sup>1</sup>, Leshan Xiu<sup>1</sup>, Yang Liu, Jian Yang, Lisi Yao<sup>2</sup>,  
Junping Peng<sup>2</sup>

<sup>1</sup>These authors contributed equally to this article.

<sup>2</sup>These authors are both corresponding authors.

Correspondence:

Junping Peng, pengjp@hotmail.com

Lisi Yao, yaolisi@hotmail.com

Supplementary information

Table S3. Maximum Likelihood fits of 24 different different  
nucleotide substitution models of phylogenetic analyses of partial  
VP1 nucleotide sequences (460-bp fragment)

[illegible][illegible]

Table. Maximum Likelihood fits of 24 different nucleotide substitution models

NOTE.-- Models with the lowest BIC scores (Bayesian Information Criterion) are considered to describe the substitution pattern the best. For each model, AICc value (Akaike Information Criterion, corrected), Maximum Likelihood value (lnL), and the number of parameters (including branch lengths) are also presented [1]. Non-uniformity of evolutionary rates among sites may be modeled by using a discrete Gamma distribution (+G) with 5 rate categories and by assuming that a certain fraction of sites are evolutionarily invariable (+I). Whenever applicable, estimates of gamma shape parameter and/or the estimated fraction of invariant sites are shown. Assumed or estimated values of transition/transversion bias (R) are shown for each model, as well. They are followed by nucleotide frequencies (f) and rates of base substitutions (r) for each nucleotide pair. Relative values of instantaneous r should be considered when evaluating them. For simplicity, sum of r values is made equal to 1 for each model. For estimating ML values, a tree topology was automatically computed. The analysis involved 55 nucleotide sequences. Codon positions included were 1st+2nd+3rd+Noncoding. All positions containing gaps and missing data were eliminated. There were a total of 458 positions in the final dataset. Evolutionary analyses were conducted in MEGA6 [2].

Abbreviations: GTR: General Time Reversible; HKY: Hasegawa-Kishino-Yano; TN93: Tamura-Nei; T92: Tamura 3-parameter; K2: Kimura 2-parameter; JC: Jukes-Cantor.

| From\To | A           | T           | C           | G           |
|---------|-------------|-------------|-------------|-------------|
| A       | -           | 0.024830035 | 0.024564018 | 0.220372909 |
| T       | 0.044275885 | -           | 0.134158982 | 0.040349473 |
| C       | 0.044275885 | 0.135611862 | -           | 0.040349473 |
| G       | 0.241817424 | 0.024830035 | 0.024564018 | -           |

| From\To | A           | T           | C           | G           |
|---------|-------------|-------------|-------------|-------------|
| A       | -           | 0.030543673 | 0.030543673 | 0.188912654 |
| T       | 0.030543673 | -           | 0.188912654 | 0.030543673 |
| C       | 0.030543673 | 0.188912654 | -           | 0.030543673 |
| G       | 0.188912654 | 0.030543673 | 0.030543673 | -           |

| From\To | A           | T           | C           | G           |
|---------|-------------|-------------|-------------|-------------|
| A       | -           | 0.024263331 | 0.024003385 | 0.1862483   |
| T       | 0.043265361 | -           | 0.172793501 | 0.039428562 |
| C       | 0.043265361 | 0.174664776 | -           | 0.039428562 |
| G       | 0.204372145 | 0.024263331 | 0.024003385 | -           |

| From\To | A           | T           | C           | G           |
|---------|-------------|-------------|-------------|-------------|
| A       | -           | 0.024830011 | 0.024563994 | 0.220372988 |
| T       | 0.044275841 | -           | 0.13415903  | 0.040349433 |
| C       | 0.044275841 | 0.135611911 | -           | 0.040349433 |
| G       | 0.241817511 | 0.024830011 | 0.024563994 | -           |

| From\To | A           | T           | C           | G           |
|---------|-------------|-------------|-------------|-------------|
| A       | -           | 0.026120695 | 0.025840851 | 0.216178195 |
| T       | 0.046577336 | -           | 0.131605317 | 0.042446829 |
| C       | 0.046577336 | 0.133030543 | -           | 0.042446829 |
| G       | 0.237214522 | 0.026120695 | 0.025840851 | -           |

| From\To | A           | T           | C           | G           |
|---------|-------------|-------------|-------------|-------------|
| A       | -           | 0.031476217 | 0.029566658 | 0.183046119 |
| T       | 0.031476217 | -           | 0.183046119 | 0.029566658 |
| C       | 0.031476217 | 0.194868129 | -           | 0.029566658 |
| G       | 0.194868129 | 0.031476217 | 0.029566658 | -           |

| From\To | A           | T           | C           | G           |
|---------|-------------|-------------|-------------|-------------|
| A       | -           | 0.031854475 | 0.031854475 | 0.186291049 |
| T       | 0.031854475 | -           | 0.186291049 | 0.031854475 |
| C       | 0.031854475 | 0.186291049 | -           | 0.031854475 |
| G       | 0.186291049 | 0.031854475 | 0.031854475 | -           |

| From\To | A           | T           | C           | G           |
|---------|-------------|-------------|-------------|-------------|
| A       | -           | 0.030543663 | 0.030543663 | 0.188912675 |
| T       | 0.030543663 | -           | 0.188912675 | 0.030543663 |
| C       | 0.030543663 | 0.188912675 | -           | 0.030543663 |
| G       | 0.188912675 | 0.030543663 | 0.030543663 | -           |

| From\To | A           | T           | C           | G           |
|---------|-------------|-------------|-------------|-------------|
| A       | -           | 0.032249173 | 0.030292722 | 0.181593992 |
| T       | 0.032249173 | -           | 0.181593992 | 0.030292722 |
| C       | 0.032249173 | 0.193322217 | -           | 0.030292722 |
| G       | 0.193322217 | 0.032249173 | 0.030292722 | -           |

| From\To | A           | T           | C           | G           |
|---------|-------------|-------------|-------------|-------------|
| A       | -           | 0.031732572 | 0.031732572 | 0.186534856 |
| T       | 0.031732572 | -           | 0.186534856 | 0.031732572 |
| C       | 0.031732572 | 0.186534856 | -           | 0.031732572 |
| G       | 0.186534856 | 0.031732572 | 0.031732572 | -           |

| From\To | A           | T           | C           | G           |
|---------|-------------|-------------|-------------|-------------|
| A       | -           | 0.024263266 | 0.024003321 | 0.186248622 |
| T       | 0.043265245 | -           | 0.172793513 | 0.039428457 |
| C       | 0.043265245 | 0.174664788 | -           | 0.039428457 |
| G       | 0.204372499 | 0.024263266 | 0.024003321 | -           |

| From\To | A           | T           | C           | G           |
|---------|-------------|-------------|-------------|-------------|
| A       | -           | 0.02524762  | 0.024977129 | 0.186516319 |
| T       | 0.045020505 | -           | 0.167229893 | 0.041028059 |
| C       | 0.045020505 | 0.169040917 | -           | 0.041028059 |
| G       | 0.204666246 | 0.02524762  | 0.024977129 | -           |

| From\To | A           | T           | C           | G           |
|---------|-------------|-------------|-------------|-------------|
| A       | -           | 0.026120689 | 0.025840845 | 0.216178215 |
| T       | 0.046577325 | -           | 0.131605329 | 0.04244682  |
| C       | 0.046577325 | 0.133030555 | -           | 0.04244682  |
| G       | 0.237214544 | 0.026120689 | 0.025840845 | -           |

| From\To | A           | T           | C           | G           |
|---------|-------------|-------------|-------------|-------------|
| A       | -           | 0.032828414 | 0.030836822 | 0.180505792 |
| T       | 0.032828414 | -           | 0.180505792 | 0.030836822 |
| C       | 0.032828414 | 0.192163735 | -           | 0.030836822 |
| G       | 0.192163735 | 0.032828414 | 0.030836822 | -           |

| From\To | A           | T           | C           | G           |
|---------|-------------|-------------|-------------|-------------|
| A       | -           | 0.031476249 | 0.029566688 | 0.18304606  |
| T       | 0.031476249 | -           | 0.18304606  | 0.029566688 |
| C       | 0.031476249 | 0.194868066 | -           | 0.029566688 |
| G       | 0.194868066 | 0.031476249 | 0.029566688 | -           |

| From\To | A           | T           | C           | G           |
|---------|-------------|-------------|-------------|-------------|
| A       | -           | 0.025247616 | 0.024977126 | 0.186516319 |
| T       | 0.045020498 | -           | 0.167229913 | 0.041028053 |
| C       | 0.045020498 | 0.169040937 | -           | 0.041028053 |
| G       | 0.204666246 | 0.025247616 | 0.024977126 | -           |

| From\To | A           | T           | C           | G           |
|---------|-------------|-------------|-------------|-------------|
| A       | -           | 0.035278766 | 0.038572669 | 0.190257432 |
| T       | 0.062907626 | -           | 0.14806293  | 0.038650591 |
| C       | 0.069526045 | 0.149666384 | -           | 0.021458202 |
| G       | 0.208771407 | 0.023784587 | 0.01306336  | -           |

| From\To | A           | T           | C           | G           |
|---------|-------------|-------------|-------------|-------------|
| A       | -           | 0.034937575 | 0.038077074 | 0.192441961 |
| T       | 0.062299229 | -           | 0.140718746 | 0.03820404  |
| C       | 0.06863275  | 0.142242666 | -           | 0.02969182  |
| G       | 0.211168513 | 0.023509791 | 0.018075835 | -           |

| From\To | A           | T           | C           | G           |
|---------|-------------|-------------|-------------|-------------|
| A       | -           | 0.035450082 | 0.039710626 | 0.188549709 |
| T       | 0.06321311  | -           | 0.14754705  | 0.039317939 |
| C       | 0.071577178 | 0.149144917 | -           | 0.021380545 |
| G       | 0.206897505 | 0.024195256 | 0.013016083 | -           |

| From\To | A           | T           | C           | G           |
|---------|-------------|-------------|-------------|-------------|
| A       | -           | 0.034937683 | 0.038077053 | 0.192443498 |
| T       | 0.062299421 | -           | 0.140717203 | 0.038204142 |
| C       | 0.068632713 | 0.142241106 | -           | 0.029691494 |
| G       | 0.211170199 | 0.023509854 | 0.018075637 | -           |

| From\To | A           | T           | C           | G           |
|---------|-------------|-------------|-------------|-------------|
| A       | -           | 0.083333333 | 0.083333333 | 0.083333333 |
| T       | 0.083333333 | -           | 0.083333333 | 0.083333333 |
| C       | 0.083333333 | 0.083333333 | -           | 0.083333333 |
| G       | 0.083333333 | 0.083333333 | 0.083333333 | -           |

| From\To | A           | T           | C           | G           |
|---------|-------------|-------------|-------------|-------------|
| A       | -           | 0.083333333 | 0.083333333 | 0.083333333 |
| T       | 0.083333333 | -           | 0.083333333 | 0.083333333 |
| C       | 0.083333333 | 0.083333333 | -           | 0.083333333 |
| G       | 0.083333333 | 0.083333333 | 0.083333333 | -           |

| From\To | A           | T           | C           | G           |
|---------|-------------|-------------|-------------|-------------|
| A       | -           | 0.083333333 | 0.083333333 | 0.083333333 |
| T       | 0.083333333 | -           | 0.083333333 | 0.083333333 |
| C       | 0.083333333 | 0.083333333 | -           | 0.083333333 |
| G       | 0.083333333 | 0.083333333 | 0.083333333 | -           |

| From\To | A           | T           | C           | G           |
|---------|-------------|-------------|-------------|-------------|
| A       | -           | 0.083333333 | 0.083333333 | 0.083333333 |
| T       | 0.083333333 | -           | 0.083333333 | 0.083333333 |
| C       | 0.083333333 | 0.083333333 | -           | 0.083333333 |
| G       | 0.083333333 | 0.083333333 | 0.083333333 | -           |
