# Supplementary material
Source: publisher figshare collection journal article supplement (https://tandf.figshare.com/articles/dataset/_/7936895)
Supplement: Supplementary file [file 1]

## *Supplementary Material*

### **Identification and characterization of a novel rodent bocavirus from different rodent species in China**

Chi Zhang<sup>1</sup>, Fenglin Song<sup>1</sup>, Leshan Xiu<sup>1</sup>, Yang Liu, Jian Yang, Lisi Yao<sup>2</sup>,  
Junping Peng<sup>2</sup>

<sup>1</sup>These authors contributed equally to this article.

<sup>2</sup>These authors are both corresponding authors.

Correspondence:

Junping Peng, pengjp@hotmail.com

Lisi Yao, yaolisi@hotmail.com

Supplementary information

Figure S2 (A), Conserved RNA splicing sites of RoBoV and HBoV.

Figure S2 (B), Genomic organization of rodent bocavirus (RoBoV) with possible extended NS1 protein generated by RNA splicing.

Figure S2 (C), Actual reading frames of extended NS1 of RoBoV isolate DL9-RN.

## Figure legend

Figure S2. (A) Conserved RNA splicing sites of RoBoV and HBoV. Sequences of RoBoV and HBoV (NC\_007455) are aligned to show the conserved RNA splicing sites (sequences in box). The splice donor site (GT) and splice acceptor site (AG) are highlighted in red. Shaded areas on the sequences represent the predicted exons. The stop codons of protein NS1 are underlined. An online tool NetGene 2.4.2 was used to predict the splice sites (<http://www.cbs.dtu.dk/services/NetGene2/>). The score represented the confidence of prediction and “H” means it is a highly confident donor/acceptor site. (B) Genomic organization of rodent bocavirus (RoBoV) compared with that of GBoV, HBoV and PBoV. Different colored boxes represent four ORFs of bocaparvovirus. Orange boxes show the possible extended NS1 protein generated by RNA splicing. The illustration was constructed by geneious software (Biomatters Ltd, Auckland, New Zealand). (C) Predicted reading frames of extended NS1 of RoBoV isolate DL9-RN. Grey shaded areas represent the predicted introns. Yellow shaded areas represent the exons.

(A)

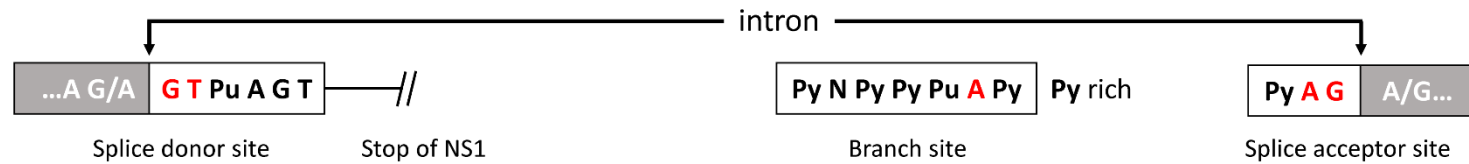

|         | Splice donor site                                                                                   | Stop of NS1                                                                                 | Branch site | Splice acceptor site | Donor Score | Acceptor Score |
|---------|-----------------------------------------------------------------------------------------------------|---------------------------------------------------------------------------------------------|-------------|----------------------|-------------|----------------|
| DL8-RN  | CGGAGGTGAGTA                                                                                        | AAATACATTCAAAAATAAAATTATACATAATATATATATTATATTTAAACAGATATAAAATTAACCTATATTTTCATT-ATATTTAGACGT |             |                      | 0.94 (H)    | 0.85           |
| DL9-RN  | CGGAGGTGAGTA                                                                                        | AAATACATTCAAAAATAAAATTATACATAATATATATATTATATTTAAACAGATATAAAATTAACCTATATTTTCATT-ATATTTAGACGT |             |                      | 0.94 (H)    | 0.85           |
| DL16-RN | CGGAGGTGAGTA                                                                                        | AAATACATTCAAAAATAAAATTATACATAATATATATATTATATTTAAACAGATATGAAATTAACCTATATTTTCATT-ATATTTAGACGT |             |                      | 0.99 (H)    | 0.87           |
| DL7-RN  | CGGAGGTGAGTA                                                                                        | AAATACATTCAAAAATAAAATTATACATAATATATATATTATATTTAAACAGATATAAAATTAACCTATATTTTCATT-ATATTTAGACGT |             |                      | 0.99 (H)    | 0.85           |
| DL14-RN | CGGAGGTGAGTA                                                                                        | AAATACATTCAAAAATAAAATTATACATAATATATATATTATATTTAAACAGATATGAAATTAACCTATATTTTCATT-ATATTTAGACGT |             |                      | 0.99 (H)    | 0.87           |
| DL23-RN | CGGAGGTGAGTA                                                                                        | AAATACATTCAAAAATAAAATTATACATAATATATA--TTATATTTAAACAGATATGGAATTAACCTATATTTAATTTATATTTAGACGT  |             |                      | 1.00 (H)    | 0.83           |
| ZM14-RF | CGGAGGTAAAGTGCTACATTCAAAATATATATATTATG-ATTATAT--TTTATTAATACTTCCAT-AACTTAACATAATTATATTTTTTATTTAGACGT |                                                                                             |             |                      | 0.94 (H)    | 0.85           |
| ZM37-RR | CGGAGGTAAAGTA                                                                                       | AAATACATTCAAAAATAAAGTATACATAATATATA--TTATATTTAAACAAATATGGAATTAACCTATATTTTCATTTATATTTAGACGT  |             |                      | 1.00 (H)    | 0.83           |
| ZM71-RN | CGGAGGTAAAGTGCTACATTCAAAATATATATATTATG-ATTATAT--TTTATTAATACTTCCAT-AACTTAACATAATTATATTTTTTATTTAGACGT |                                                                                             |             |                      | 0.94 (H)    | 0.85           |
| HBoV1   | ACCAAAGTAAGTA                                                                                       | AAATACGCATGCGCAAGT-AA-T-T-C-T--TTTACTTTCACCT--C-GCTAT--TTTACCAAT-TTTTA--CT-TTTAGCTGAC       |             |                      | 0.99 (H)    | 1.00 (H)       |

(B)

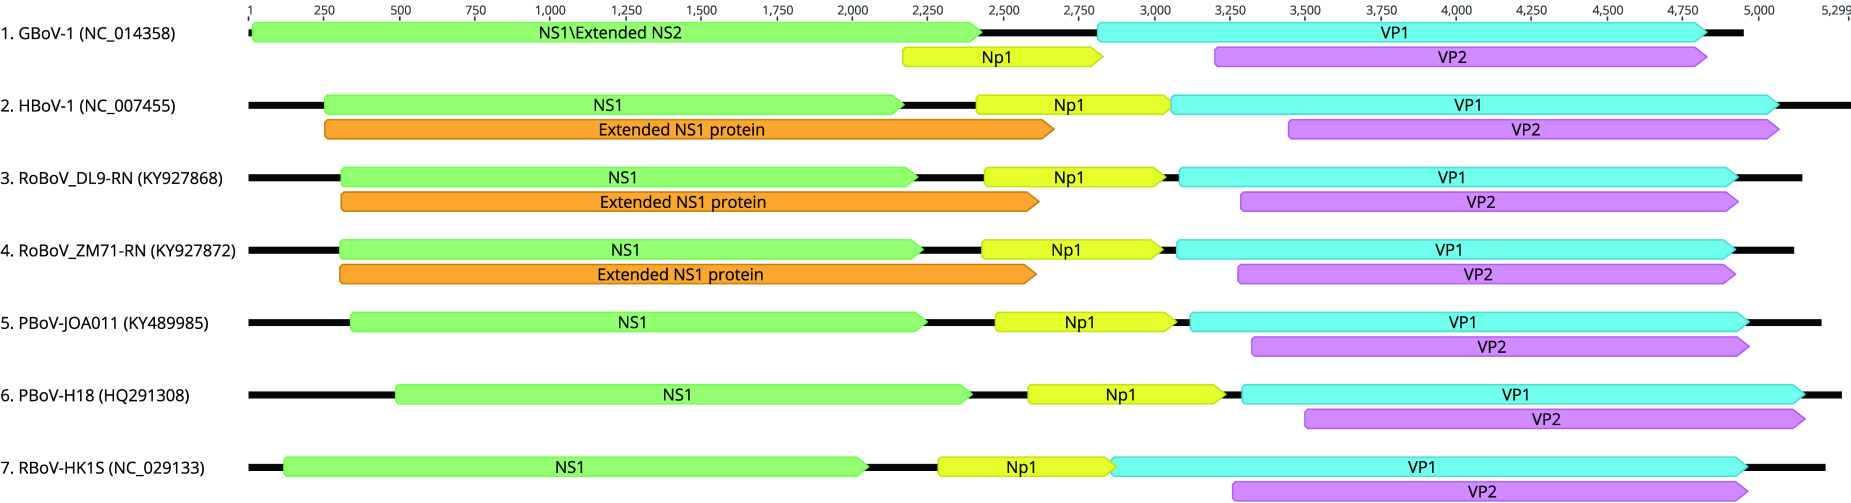

(C)

ATGCCTCTGATCAACTTTCAAGCAGCATTTGAGAGCTTCGGGGGAATTGCATATACCTATATTTTAAGATTTCTAAATTTCTACGGATGACTATCATAATATGCTACAGCAGTGCTTAGGAG  
ATAGCGAAAACAGTTGCTTGCATGAATCGGAAGAATGTGGAAAACACTATCCAGAATTTCAAATGAATGTTCCGATTAGCCGATTATCAACGAAAACATATGAACACAACATTTCAGTG  
TTCGCAGAAAACAGCTGTAAGAAAGGTGTTTGAAAATCAGCAAATGACAAGAACACCATCTTACACGAGCTTTGTTCAAGTTGAGCACGGACAAAATCTCCATGTTCACTTAGTGCTGTCCG  
GAGACGGACTCACAAAATATACAGCGAAAAAATTTAGATCAAAACTAGCTGTATATTTTATGCACAACCTGAACAAAAACAAAAAGAAGAGCTGCAAGAGCTGTATGGAACGCCGAGAT  
GGGCACCATACACAAAACCAATTTAGACGCGCTAACTAAATCTCAAGAAGGAAGCACAGACTTCTGCACTGTACTACAGTACAAAAGCAGAAATGGAGAAATGTACTCGTGCCGTGTGG  
ATGCGCGAAGCTTCATTGCTAACTACATGCTGCCAAAGAACCTAGAAATCAACAACAAAATATGGTCAAATACTTACAAAGTTCCAGGGCCAATGGCAGACTCATTATTTTAAATGGAAAA  
ACATACACATACAGCAGCATCAACTCAATGCAAATCTTGCCGCACATTAGAAGAGATCTTAAGGAATGGCTGGAAGATTGTCATGGAATAAATGCTGACGAGCCGGTCTTTACTGGAGATCC  
GCTTTCTGACCTACCAAAGGTAAGAAAAGCACAATGGGAAAAAACTGCGCAACCGGGAGGAAAAATGTCTAAACGAGAAGGCTTAGTATTAGATTGCATGAATAGAGCCATTGAATCTGA  
CTGCTTAACATACGAACAATTAGTAGACAAACACCCGGAAATAATAATCATGATGGAAAAGCCAAGCAGGTGGAAGCAAGCTGATAGAACAGACTTTGAACATGGTGCATATAAACTAACA  
CAAAAGTATACAGCCATGTCATATATGATGAAACGGTTTCCAACCTTTAACCTGCAATTAGACAATAAAGCAATTAGACTATTGAATTATCAAGGCTATAATTGCTGGCAAGTTGGACATTGGC  
TGTGTACTGTGTTAGATAAGAAGAGCGGAAAGCAGAACACCATAAGTTTTATGGTCCTGCCAGTACAGGAAAGACCAACCTGGCCAAAGCCATTGTAAATTGTGTAAATCTATTTGGCAAT  
GTGAATCATTTAAACAAAAAATTTGTGTTTAACGATTGCTCGAACAAGCTGGTTGTATGGTGGGAAGAAGCACTAATGCACACCGACTGGGTAGAACCTGCTAAATGTGTTTTGGGTGGAA  
CAACAGTAAGAATTGACAGAAAACACAAAGATTCGCAACTGCTGCCGCAGACTCCATGCATCATATCTACAAACAACAACATTTACGAGTGTGTAGGTGGAAACCACGTATCTCATGTGCAC  
TGCAAGCCATTAAAGGACAGAGTGGTTCAGCTAAATTTATGAAAAGCTTACCACAAAACTTCGGAGAAATACAAGAGCAAGAGATTGCAGATTGGTTGCTAACCTGCAAAGAGAAATAC  
ACATGCACATTGGACGGATACTGCACTACATGGAAAACGAAGAACGTGACCAATGACATGCCGTTGGCTAAGTTATGCCCTTCTCATTTCGCAGGACTTCACGCTCCATGAGAACGGAACGT  
GTACCCGCTGCGGTGGTTATTTGCCTCTTGATACTGACCCTCAATTTGATCTCGATAGTGATTTTGGGGACGACGGAGGTGAGTAATACATTCAAAAAATAAATTATACATAATATATATATATAT  
TAAAACAGATATAAAATTAACCTATATTTTATTATTTAGACGTCCCTACTGCTGAAGTCATCGGAAACAATCTCGGAAGTCCTGAGCCTGGTATCACAGAACCAGACAGAAAAAAAATAAA  
AAAACAGGTACAACAAAGGCTGGAATTTCTTGAAAAGTGGGCATCACAACTCGAGACAGCTATGAGTGGGCAGAATACATACAGGAAAGAGACCAACTATTAGAGAGGACAACCTCGG  
AGGAGTCCTTTGAAGGAGAGAAAGGAGAAAACACCACGAGAAGGAACGGAGACGGAGCAGGAGCAGGAGCCCTTAAGAAAGATTGAGAACAGAATGGAGGAATTGAAGAAACAGC  
CTTTTAA
