# Supplementary material
Source: publisher figshare collection journal article supplement (https://tandf.figshare.com/articles/dataset/_/7936895)
Supplement: Supplementary file [file 1]

## *Supplementary Material*

### **Identification and characterization of a novel rodent bocavirus from different rodent species in China**

Chi Zhang<sup>1</sup>, Fenglin Song<sup>1</sup>, Leshan Xiu<sup>1</sup>, Yang Liu, Jian Yang, Lisi Yao<sup>2</sup>,  
Junping Peng<sup>2</sup>

<sup>1</sup>These authors contributed equally to this article.

<sup>2</sup>These authors are both corresponding authors.

Correspondence:

Junping Peng, pengjp@hotmail.com

Lisi Yao, yaolisi@hotmail.com

Supplementary information

Table S1, primers used for target screening and genome amplifying

Table S1. Primers used for target screening and genome amplifying. Target region was calculated based on the full genome of RoBoV isolate DL8-RN (KY927867).

| Name        | Sequence                 | Target Region | Description                                                     |
|-------------|--------------------------|---------------|-----------------------------------------------------------------|
| PBNS1-F1    | CCCAGTACAGGAAAGACCAACC   | 1626-2038     | Primers used for targeting screening.                           |
| PBNS2-R1    | GAAGGGCATAACTTAGCCAACG   |               |                                                                 |
| PBNS1-F2    | GTAAATCTATTCGGCAATGTGA   |               |                                                                 |
| PBNS1-R2    | CATGTAGTGCAGTATCCGTCCA   |               |                                                                 |
| 5UTR1-F     | AAGGCGGGGCGATATAAGCA     | 1-495         | Ten sets of specific nested primers used for genome amplifying. |
| 5UTR1-R-OUT | TGCTGATTTTCAAACACCTTTC   |               |                                                                 |
| 5UTR1-R-IN  | CATTTGGAAATTCTGGATAGTGT  |               |                                                                 |
| 5UTR2-F     | CAATCAACCTGGTGGTGAGTAA   | 282-495       |                                                                 |
| 5UTR2-R-OUT | TGCTGATTTTCAAACACCTTTC   |               |                                                                 |
| 5UTR2-R-IN  | CATTTGGAAATTCTGGATAGTGT  |               |                                                                 |
| N1-F-OUT    | TTTCCTAAATTTCTACGGATGACT | 418-1316      |                                                                 |
| N1-R-OUT    | CACCTGCTTGGCTTTCCATC     |               |                                                                 |
| N1-F-IN     | AGTGCTTAGGAGATAGCGAAAACA |               |                                                                 |
| N1-R-IN     | TTCCGGGTGTTTGTCTACTAATTG |               |                                                                 |

|          |                         |           |
|----------|-------------------------|-----------|
| N2-F-OUT | TGGCTGGAAGATTTGCATGG    |           |
| N2-R-OUT | CCTGCGAATGAGAAGGGGCAT   | 1133-2057 |
| N2-F-IN  | CGAGCCGGTCTTTACTGGAG    |           |
| N2-R-IN  | GGTCACGTTCTTCGTTTTCCA   |           |
| N3-F-OUT | CCGCAGACTCCATGCATCA     |           |
| N3-R-OUT | AAAATGCCACATCATGCTTCTGT | 1850-2821 |
| N3-F-IN  | CGAGTGTGTAGGTGGAAACCA   |           |
| N3-R-IN  | ACCCATTCCACCTTCCCTTC    |           |
| N4-F-OUT | AACAAAAGGCCAGGGAGGAT    |           |
| N4-R-OUT | AGCCTCTGCCAGTCATTTGG    | 2642-3563 |
| N4-F-IN  | ACAACGAGTTAGCGTGGTAGA   |           |
| N4-R-IN  | ACCCCCATGGAGTCCTGATT    |           |
| N5-F-OUT | GCTAAGAGGGCCAGAATGGG    |           |
| N5-R-OUT | AATGCTGGTGAGCCCATGTA    | 3305-4220 |
| N5-F-IN  | GGGGAAACAGACGATGTGGT    |           |
| N5-R-IN  | TGAATGCCCCTGCTGATGTT    |           |

|             |                          |           |
|-------------|--------------------------|-----------|
| N6-F-OUT    | ACATAAGGGGAAACATGGCTAGGG |           |
| N6-R-OUT    | ATGAAATTCTGAGCTCTGGTCTCC | 3984-4817 |
| N6-F-IN     | TTGAATTTGACTTCGATTGCGGT  |           |
| N6-R-IN     | AAATTCTGAGCTCTGGTCTCCAA  |           |
| 3UTR2-F-OUT | GGGAACAGTATGGAGTCAAGCC   |           |
| 3UTR2-F-IN  | GGGACAAACAACCAAATACAGA   | 4584-4985 |
| 3UTR2-R     | AATGGCGTCGTGGTTGTTGTAT   |           |
| 3UTR1-F-OUT | GGGAACAGTATGGAGTCAAGCC   |           |
| 3UTR1-F-IN  | GGGACAAACAACCAAATACAGA   | 4584-5133 |
| 3UTR1-R     | ATGTTATATTACCGGCGCACAT   |           |
