# Supplementary material
Source: publisher figshare collection journal article supplement (https://tandf.figshare.com/articles/dataset/_/7936895)
Supplement: Supplementary file [file 1]

## *Supplementary Material*

### **Identification and characterization of a novel rodent bocavirus from different rodent species in China**

Chi Zhang<sup>1</sup>, Fenglin Song<sup>1</sup>, Leshan Xiu<sup>1</sup>, Yang Liu, Jian Yang, Lisi Yao<sup>2</sup>,  
Junping Peng<sup>2</sup>

<sup>1</sup>These authors contributed equally to this article.

<sup>2</sup>These authors are both corresponding authors.

Correspondence:

Junping Peng, pengjp@hotmail.com

Lisi Yao, yaolisi@hotmail.com

Supplementary information

Figure S1, Sequence alignments showing the short VP1u region of RoBoVs and a lack of phospholipase A<sub>2</sub> motif.

Figure S1

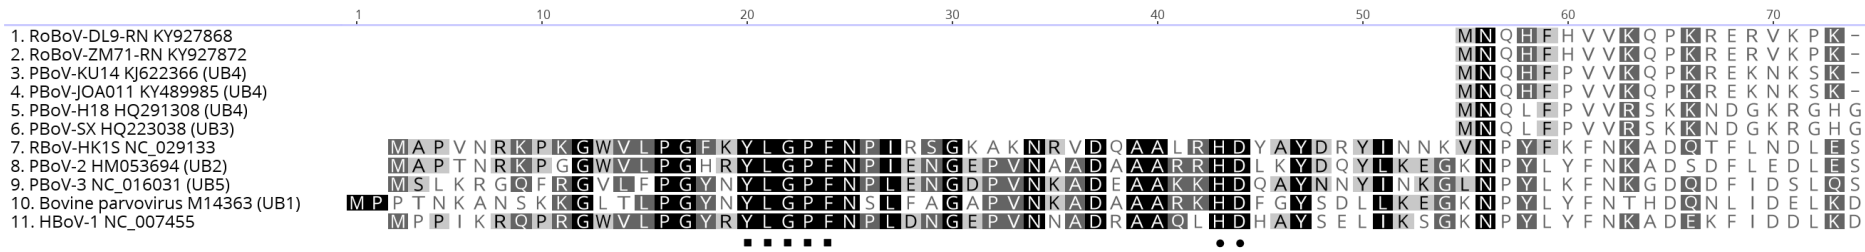

## Figure legend

Figure S1. Amino acid sequences of VP1 protein were aligned to show the short VP1u region of RoBoVs and a lack of phospholipase A<sub>2</sub> (PLA<sub>2</sub>) related motifs. The PLA<sub>2</sub> related Ca<sup>2+</sup> binding loop (the YXGXG motif) was underlined by filled squares and residuals in the catalytic site (the HDXXY motif) were underlined by filled circles.
