# Supplementary material
Source: publisher figshare collection journal article supplement (https://tandf.figshare.com/articles/dataset/_/7936895)
Supplement: Supplementary file [file 1]

## *Supplementary Material*

### **Identification and characterization of a novel rodent bocavirus from different rodent species in China**

Chi Zhang<sup>1</sup>, Fenglin Song<sup>1</sup>, Leshan Xiu<sup>1</sup>, Yang Liu, Jian Yang, Lisi Yao<sup>2</sup>,  
Junping Peng<sup>2</sup>

<sup>1</sup>These authors contributed equally to this article.

<sup>2</sup>These authors are both corresponding authors.

Correspondence:

Junping Peng, pengjp@hotmail.com

Lisi Yao, yaolisi@hotmail.com

Supplementary information

Table S2. Maximum Likelihood fits of 48 different amino acid  
substitution models of phylogenetic analyses of NS1 amino acid  
sequences

[illegible][illegible]

NOTE.-- Models with the lowest BIC scores (Bayesian Information Criterion) are considered to describe the substitution pattern the best. For each model, AICc value (Akaike Information Criterion, corrected), Maximum Likelihood value (lnL), and the number of parameters (including branch lengths) are also presented. Non-uniformity of evolutionary rates among sites may be modeled by using a discrete Gamma distribution (+G) with 5 rate categories and by assuming that a certain fraction of sites are evolutionarily invariable (+I). Whenever applicable, estimates of gamma shape parameter and/or the estimated fraction of invariant sites are shown. They are followed by amino acid frequencies (f) and rates of amino acid substitutions (r) for each amino acid pair. Relative values of instantaneous r should be considered when evaluating them. For simplicity, sum of r values is made equal to 1 for each model. For estimating ML values, a tree topology was automatically computed. The analysis involved 57 amino acid sequences. All positions containing gaps and missing data were eliminated. There were a total of 445 positions in the final dataset. Evolutionary analyses were conducted in MEGA6.

Abbreviations: GTR: General Time Reversible; JTT: Jones-Taylor-Thornton; rtREV: General Reverse Transcriptase; cpREV: General Reversible Chloroplast; mtREV24: General Reversible Mitochondrial.

[illegible]

[illegible]

[illegible]

[illegible]

[illegible]

[illegible]

[illegible]

|    | A          | B          | C          | D          | E          | F          | G          | H          | I          | J          | K          | L          | M          | N          | O          | P          | Q          | R          | S          | T          | U          | V          | W          | X          | Y          | Z          |
|----|------------|------------|------------|------------|------------|------------|------------|------------|------------|------------|------------|------------|------------|------------|------------|------------|------------|------------|------------|------------|------------|------------|------------|------------|------------|------------|
| 1  | 0.00240003 | 0.00149034 | 0.00126128 | 0.00104543 | 0.00086986 | 0.00072824 | 0.00061714 | 0.00053146 | 0.00046745 | 0.00042057 | 0.00038741 | 0.00035741 | 0.00033019 | 0.00030539 | 0.00028271 | 0.00026197 | 0.00024301 | 0.00022561 | 0.00020957 | 0.00019471 | 0.00018085 | 0.00016791 | 0.00015579 | 0.00014441 | 0.00013367 | 0.00012349 |
| 2  | 0.00240003 | 0.00149101 | 0.00126165 | 0.00104583 | 0.00086996 | 0.00072824 | 0.00061714 | 0.00053146 | 0.00046745 | 0.00042057 | 0.00038741 | 0.00035741 | 0.00033019 | 0.00030539 | 0.00028271 | 0.00026197 | 0.00024301 | 0.00022561 | 0.00020957 | 0.00019471 | 0.00018085 | 0.00016791 | 0.00015579 | 0.00014441 | 0.00013367 | 0.00012349 |
| 3  | 0.00240003 | 0.00149168 | 0.00126202 | 0.00104620 | 0.00087023 | 0.00072824 | 0.00061714 | 0.00053146 | 0.00046745 | 0.00042057 | 0.00038741 | 0.00035741 | 0.00033019 | 0.00030539 | 0.00028271 | 0.00026197 | 0.00024301 | 0.00022561 | 0.00020957 | 0.00019471 | 0.00018085 | 0.00016791 | 0.00015579 | 0.00014441 | 0.00013367 | 0.00012349 |
| 4  | 0.00240003 | 0.00149235 | 0.00126239 | 0.00104657 | 0.00087056 | 0.00072824 | 0.00061714 | 0.00053146 | 0.00046745 | 0.00042057 | 0.00038741 | 0.00035741 | 0.00033019 | 0.00030539 | 0.00028271 | 0.00026197 | 0.00024301 | 0.00022561 | 0.00020957 | 0.00019471 | 0.00018085 | 0.00016791 | 0.00015579 | 0.00014441 | 0.00013367 | 0.00012349 |
| 5  | 0.00240003 | 0.00149302 | 0.00126276 | 0.00104694 | 0.00087089 | 0.00072824 | 0.00061714 | 0.00053146 | 0.00046745 | 0.00042057 | 0.00038741 | 0.00035741 | 0.00033019 | 0.00030539 | 0.00028271 | 0.00026197 | 0.00024301 | 0.00022561 | 0.00020957 | 0.00019471 | 0.00018085 | 0.00016791 | 0.00015579 | 0.00014441 | 0.00013367 | 0.00012349 |
| 6  | 0.00240003 | 0.00149369 | 0.00126313 | 0.00104731 | 0.00087122 | 0.00072824 | 0.00061714 | 0.00053146 | 0.00046745 | 0.00042057 | 0.00038741 | 0.00035741 | 0.00033019 | 0.00030539 | 0.00028271 | 0.00026197 | 0.00024301 | 0.00022561 | 0.00020957 | 0.00019471 | 0.00018085 | 0.00016791 | 0.00015579 | 0.00014441 | 0.00013367 | 0.00012349 |
| 7  | 0.00240003 | 0.00149436 | 0.00126350 | 0.00104768 | 0.00087155 | 0.00072824 | 0.00061714 | 0.00053146 | 0.00046745 | 0.00042057 | 0.00038741 | 0.00035741 | 0.00033019 | 0.00030539 | 0.00028271 | 0.00026197 | 0.00024301 | 0.00022561 | 0.00020957 | 0.00019471 | 0.00018085 | 0.00016791 | 0.00015579 | 0.00014441 | 0.00013367 | 0.00012349 |
| 8  | 0.00240003 | 0.00149503 | 0.00126387 | 0.00104805 | 0.00087188 | 0.00072824 | 0.00061714 | 0.00053146 | 0.00046745 | 0.00042057 | 0.00038741 | 0.00035741 | 0.00033019 | 0.00030539 | 0.00028271 | 0.00026197 | 0.00024301 | 0.00022561 | 0.00020957 | 0.00019471 | 0.00018085 | 0.00016791 | 0.00015579 | 0.00014441 | 0.00013367 | 0.00012349 |
| 9  | 0.00240003 | 0.00149570 | 0.00126424 | 0.00104842 | 0.00087221 | 0.00072824 | 0.00061714 | 0.00053146 | 0.00046745 | 0.00042057 | 0.00038741 | 0.00035741 | 0.00033019 | 0.00030539 | 0.00028271 | 0.00026197 | 0.00024301 | 0.00022561 | 0.00020957 | 0.00019471 | 0.00018085 | 0.00016791 | 0.00015579 | 0.00014441 | 0.00013367 | 0.00012349 |
| 10 | 0.00240003 | 0.00149637 | 0.00126461 | 0.00104879 | 0.00087254 | 0.00072824 | 0.00061714 | 0.00053146 | 0.00046745 | 0.00042057 | 0.00038741 | 0.00035741 | 0.00033019 | 0.00030539 | 0.00028271 | 0.00026197 | 0.00024301 | 0.00022561 | 0.00020957 | 0.00019471 | 0.00018085 | 0.00016791 | 0.00015579 | 0.00014441 | 0.00013367 | 0.00012349 |
| 11 | 0.00240003 | 0.00149704 | 0.00126528 | 0.00104916 | 0.00087287 | 0.00072824 | 0.00061714 | 0.00053146 | 0.00046745 | 0.00042057 | 0.00038741 | 0.00035741 | 0.00033019 | 0.00030539 | 0.00028271 | 0.00026197 | 0.00024301 | 0.00022561 | 0.00020957 | 0.00019471 | 0.00018085 | 0.00016791 | 0.00015579 | 0.00014441 | 0.00013367 | 0.00012349 |
| 12 | 0.00240003 | 0.00149771 | 0.00126565 | 0.00104953 | 0.00087320 | 0.00072824 | 0.00061714 | 0.00053146 | 0.00046745 | 0.00042057 | 0.00038741 | 0.00035741 | 0.00033019 | 0.00030539 | 0.00028271 | 0.00026197 | 0.00024301 | 0.00022561 | 0.00020957 | 0.00019471 | 0.00018085 | 0.00016791 | 0.00015579 | 0.00014441 | 0.00013367 | 0.00012349 |
| 13 | 0.00240003 | 0.00149838 | 0.00126602 | 0.00104990 | 0.00087353 | 0.00072824 | 0.00061714 | 0.00053146 | 0.00046745 | 0.00042057 | 0.00038741 | 0.00035741 | 0.00033019 | 0.00030539 | 0.00028271 | 0.00026197 | 0.00024301 | 0.00022561 | 0.00020957 | 0.00019471 | 0.00018085 | 0.00016791 | 0.00015579 | 0.00014441 | 0.00013367 | 0.00012349 |
| 14 | 0.00240003 | 0.00149905 | 0.00126639 | 0.00105027 | 0.00087386 | 0.00072824 | 0.00061714 | 0.00053146 | 0.00046745 | 0.00042057 | 0.00038741 | 0.00035741 | 0.00033019 | 0.00030539 | 0.00028271 | 0.00026197 | 0.00024301 | 0.00022561 | 0.00020957 | 0.00019471 | 0.00018085 | 0.00016791 | 0.00015579 | 0.00014441 | 0.00013367 | 0.00012349 |
| 15 | 0.00240003 | 0.00149972 | 0.00126676 | 0.00105064 | 0.00087419 | 0.00072824 | 0.00061714 | 0.00053146 | 0.00046745 | 0.00042057 | 0.00038741 | 0.00035741 | 0.00033019 | 0.00030539 | 0.00028271 | 0.00026197 | 0.00024301 | 0.00022561 | 0.00020957 | 0.00019471 | 0.00018085 | 0.00016791 | 0.00015579 | 0.00014441 | 0.00013367 | 0.00012349 |
| 16 | 0.00240003 | 0.00150039 | 0.00126713 | 0.00105101 | 0.00087452 | 0.00072824 | 0.00061714 | 0.00053146 | 0.00046745 | 0.00042057 | 0.00038741 | 0.00035741 | 0.00033019 | 0.00030539 | 0.00028271 | 0.00026197 | 0.00024301 | 0.00022561 | 0.00020957 | 0.00019471 | 0.00018085 | 0.00016791 | 0.00015579 | 0.00014441 | 0.00013367 | 0.00012349 |
| 17 | 0.00240003 | 0.00150106 | 0.00126750 | 0.00105138 | 0.00087485 | 0.00072824 | 0.00061714 | 0.00053146 | 0.00046745 | 0.00042057 | 0.00038741 | 0.00035741 | 0.00033019 | 0.00030539 | 0.00028271 | 0.00026197 | 0.00024301 | 0.00022561 | 0.00020957 | 0.00019471 | 0.00018085 | 0.00016791 | 0.00015579 | 0.00014441 | 0.00013367 | 0.00012349 |
| 18 | 0.00240003 | 0.00150173 | 0.00126787 | 0.00105175 | 0.00087518 | 0.00072824 | 0.00061714 | 0.00053146 | 0.00046745 | 0.00042057 | 0.00038741 | 0.00035741 | 0.00033019 | 0.00030539 | 0.00028271 | 0.00026197 | 0.00024301 | 0.00022561 | 0.00020957 | 0.00019471 | 0.00018085 | 0.00016791 | 0.00015579 | 0.00014441 | 0.00013367 | 0.00012349 |
| 19 | 0.00240003 | 0.00150240 | 0.00126824 | 0.00105212 | 0.00087551 | 0.00072824 | 0.00061714 | 0.00053146 | 0.00046745 | 0.00042057 | 0.00038741 | 0.00035741 | 0.00033019 | 0.00030539 | 0.00028271 | 0.00026197 | 0.00024301 | 0.00022561 | 0.00020957 | 0.00019471 | 0.00018085 | 0.00016791 | 0.00015579 | 0.00014441 | 0.00013367 | 0.00012349 |
| 20 | 0.00240003 | 0.00150307 | 0.00126861 | 0.00105249 | 0.00087584 | 0.00072824 | 0.00061714 | 0.00053146 | 0.00046745 | 0.00042057 | 0.00038741 | 0.00035741 | 0.00033019 | 0.00030539 | 0.00028271 | 0.00026197 | 0.00024301 | 0.00022561 | 0.00020957 | 0.00019471 | 0.00018085 | 0.00016791 | 0.00015579 | 0.00014441 | 0.00013367 | 0.00012349 |
| 21 | 0.00240003 | 0.00150374 | 0.00126898 | 0.00105286 | 0.00087617 | 0.00072824 | 0.00061714 | 0.00053146 | 0.00046745 | 0.00042057 | 0.00038741 | 0.00035741 | 0.00033019 | 0.00030539 | 0.00028271 | 0.00026197 | 0.00024301 | 0.00022561 | 0.00020957 | 0.00019471 | 0.00018085 | 0.00016791 | 0.00015579 | 0.00014441 | 0.00013367 | 0.00012349 |
| 22 | 0.00240003 | 0.00150441 | 0.00126935 | 0.00105323 | 0.00087650 | 0.00072824 | 0.00061714 | 0.00053146 | 0.00046745 | 0.00042057 | 0.00038741 | 0.00035741 | 0.00033019 | 0.00030539 | 0.00028271 | 0.00026197 | 0.00024301 | 0.00022561 | 0.00020957 | 0.00019471 | 0.00018085 | 0.00016791 | 0.00015579 | 0.00014441 | 0.00013367 | 0.00012349 |
| 23 | 0.00240003 | 0.00150508 | 0.00126972 | 0.00105360 | 0.00087683 | 0.00072824 | 0.00061714 | 0.00053146 | 0.00046745 | 0.00042057 | 0.00038741 | 0.00035741 | 0.00033019 | 0.00030539 | 0.00028271 | 0.00026197 | 0.00024301 | 0.00022561 | 0.00020957 | 0.00019471 | 0.00018085 | 0.00016791 | 0.00015579 | 0.00014441 | 0.00013367 | 0.00012349 |
| 24 | 0.00240003 | 0.00150575 | 0.00127009 | 0.00105397 | 0.00087716 | 0.00072824 | 0.00061714 | 0.00053146 | 0.00046745 | 0.00042057 | 0.00038741 | 0.00035741 | 0.00033019 | 0.00030539 | 0.00028271 | 0.00026197 | 0.00024301 | 0.00022561 | 0.00020957 | 0.00019471 | 0.00018085 | 0.00016791 | 0.00015579 | 0.00014441 | 0.00013367 | 0.00012349 |
| 25 | 0.00240003 | 0.00150642 | 0.00127046 | 0.00105434 | 0.00087749 | 0.00072824 | 0.00061714 | 0.00053146 | 0.00046745 | 0.00042057 | 0.00038741 | 0.00035741 | 0.00033019 | 0.00030539 | 0.00028271 | 0.00026197 | 0.00024301 | 0.00022561 | 0.00020957 | 0.00019471 | 0.00018085 | 0.00016791 | 0.00015579 | 0.00014441 | 0.00013367 | 0.00012349 |
| 26 | 0.00240003 | 0.00150709 | 0.00127083 | 0.00105471 | 0.00087782 | 0.00072824 | 0.00061714 | 0.00053146 | 0.00046745 | 0.00042057 | 0.00038741 | 0.00035741 | 0.00033019 | 0.00030539 | 0.00028271 | 0.00026197 | 0.00024301 | 0.00022561 | 0.00020957 | 0.00019471 | 0.00018085 | 0.00016791 | 0.00015579 | 0.00014441 | 0.00013367 | 0.00012349 |
| 27 | 0.00240003 | 0.00150776 | 0.00127120 | 0.00105508 | 0.00087815 | 0.00072824 | 0.00061714 | 0.00053146 | 0.00046745 | 0.00042057 | 0.00038741 | 0.00035741 | 0.00033019 | 0.00030539 | 0.00028271 | 0.00026197 | 0.00024301 | 0.00022561 | 0.00020957 | 0.00019471 | 0.00018085 | 0.00016791 | 0.00015579 | 0.00014441 | 0.00013367 | 0.00012349 |
| 28 | 0.00240003 | 0.00150843 | 0.00127157 | 0.00105545 | 0.00087848 | 0.00072824 | 0.00061714 | 0.00053146 | 0.00046745 | 0.00042057 | 0.00038741 | 0.00035741 | 0.00033019 | 0.00030539 | 0.00028271 | 0.00026197 | 0.00024301 | 0.00022561 | 0.00020957 | 0.00019471 | 0.00018085 | 0.00016791 | 0.00015579 | 0.00014441 | 0.00013367 | 0.00012349 |
| 29 | 0.00240003 | 0.00150910 | 0.00127194 | 0.00105582 | 0.00087881 | 0.00072824 | 0.00061714 | 0.00053146 | 0.00046745 | 0.00042057 | 0.00038741 | 0.00035741 | 0.00033019 | 0.00030539 | 0.00028271 | 0.00026197 | 0.00024301 | 0.00022561 | 0.00020957 | 0.00019471 | 0.00018085 | 0.00016791 | 0.00015579 | 0.00014441 | 0.00013367 | 0.00012349 |
| 30 | 0.00240003 | 0.00150977 | 0.00127231 | 0.00105619 | 0.00087914 | 0.00072824 | 0.00061714 | 0.00053146 | 0.00046745 | 0.00042057 | 0.00038741 | 0.00035741 | 0.00033019 | 0.00030539 | 0.00028271 | 0.00026197 | 0.00024301 | 0.00022561 | 0.00020957 | 0.00019471 | 0.00018085 | 0.00016791 | 0.00015579 | 0.00014441 | 0.00013367 | 0.00012349 |
| 31 | 0.00240003 | 0.00151044 | 0.00127268 | 0.00105656 | 0.00087947 | 0.00072824 | 0.00061714 | 0.00053146 | 0.00046745 | 0.00042057 | 0.00038741 | 0.00035741 | 0.00033019 | 0.00030539 |            |            |            |            |            |            |            |            |            |            |            |            |

[illegible]

|   | A          | B          | C          | D          | E          | F          | G          | H          | I          | J          | K          | L          | M          | N          | O          | P          | Q          | R          | S          | T          | U          | V          | W          | X          | Y          | Z          |            |            |            |            |            |            |            |            |            |            |            |            |            |            |            |            |            |            |            |            |            |            |            |            |            |            |            |            |            |            |            |            |            |            |            |            |            |            |            |            |            |            |            |            |            |            |            |            |            |            |            |            |            |            |            |            |            |            |            |            |            |            |            |            |            |            |            |            |            |            |            |            |            |            |            |            |            |            |            |            |            |            |            |            |            |            |            |            |            |            |            |            |            |            |            |            |            |            |            |            |            |            |            |            |            |            |            |            |            |            |            |            |            |            |            |            |            |            |            |            |            |            |            |            |            |            |            |            |            |            |            |            |            |            |            |            |            |            |            |            |            |            |            |            |            |            |            |            |            |            |            |            |            |            |            |            |            |            |            |            |            |            |            |            |            |            |            |            |            |            |            |            |            |            |            |            |            |            |            |            |            |            |            |            |            |            |            |            |            |            |            |            |            |            |            |            |            |            |            |            |            |            |            |            |            |            |            |            |            |            |            |            |            |            |            |            |            |            |            |            |            |            |            |            |            |            |            |            |            |            |            |            |            |            |            |            |            |            |            |            |            |            |            |            |            |            |            |            |            |            |            |            |            |            |            |            |            |            |            |            |            |            |            |            |            |            |            |            |            |            |            |            |            |            |            |            |            |            |            |            |            |            |            |            |            |            |            |            |            |            |            |            |            |            |            |            |            |            |            |            |            |            |            |            |            |            |            |            |            |            |            |            |            |            |            |            |            |            |            |            |            |            |            |            |            |            |            |            |            |            |            |            |            |            |            |            |            |            |            |            |            |            |            |            |            |            |            |            |            |            |            |            |            |            |            |            |            |            |            |            |            |            |            |            |            |            |            |            |            |            |            |            |            |            |            |            |            |            |            |            |            |            |            |            |            |            |            |            |            |            |            |            |            |            |            |            |            |            |            |            |            |            |            |            |            |            |            |            |            |            |            |            |            |            |            |            |            |            |            |            |            |            |            |            |            |            |            |            |            |            |            |            |            |            |            |            |            |            |            |            |            |            |            |            |            |            |            |            |            |            |            |            |            |            |            |            |            |            |            |            |            |            |            |            |            |            |            |            |            |            |            |            |            |            |            |            |            |            |            |            |            |            |            |            |            |            |            |            |            |            |            |            |            |            |            |            |            |            |            |            |            |            |            |            |            |            |            |            |            |            |            |            |            |            |            |            |            |            |            |            |            |            |            |            |            |            |            |            |            |            |            |            |            |            |            |            |            |            |            |            |            |            |            |            |            |            |            |            |            |            |            |            |            |            |            |            |            |            |            |            |            |            |            |            |            |            |            |            |            |            |            |            |            |            |            |            |            |            |            |            |            |            |            |            |            |            |            |            |            |            |            |            |            |            |            |            |            |            |            |            |            |            |            |            |            |            |            |            |            |
|---|------------|------------|------------|------------|------------|------------|------------|------------|------------|------------|------------|------------|------------|------------|------------|------------|------------|------------|------------|------------|------------|------------|------------|------------|------------|------------|------------|------------|------------|------------|------------|------------|------------|------------|------------|------------|------------|------------|------------|------------|------------|------------|------------|------------|------------|------------|------------|------------|------------|------------|------------|------------|------------|------------|------------|------------|------------|------------|------------|------------|------------|------------|------------|------------|------------|------------|------------|------------|------------|------------|------------|------------|------------|------------|------------|------------|------------|------------|------------|------------|------------|------------|------------|------------|------------|------------|------------|------------|------------|------------|------------|------------|------------|------------|------------|------------|------------|------------|------------|------------|------------|------------|------------|------------|------------|------------|------------|------------|------------|------------|------------|------------|------------|------------|------------|------------|------------|------------|------------|------------|------------|------------|------------|------------|------------|------------|------------|------------|------------|------------|------------|------------|------------|------------|------------|------------|------------|------------|------------|------------|------------|------------|------------|------------|------------|------------|------------|------------|------------|------------|------------|------------|------------|------------|------------|------------|------------|------------|------------|------------|------------|------------|------------|------------|------------|------------|------------|------------|------------|------------|------------|------------|------------|------------|------------|------------|------------|------------|------------|------------|------------|------------|------------|------------|------------|------------|------------|------------|------------|------------|------------|------------|------------|------------|------------|------------|------------|------------|------------|------------|------------|------------|------------|------------|------------|------------|------------|------------|------------|------------|------------|------------|------------|------------|------------|------------|------------|------------|------------|------------|------------|------------|------------|------------|------------|------------|------------|------------|------------|------------|------------|------------|------------|------------|------------|------------|------------|------------|------------|------------|------------|------------|------------|------------|------------|------------|------------|------------|------------|------------|------------|------------|------------|------------|------------|------------|------------|------------|------------|------------|------------|------------|------------|------------|------------|------------|------------|------------|------------|------------|------------|------------|------------|------------|------------|------------|------------|------------|------------|------------|------------|------------|------------|------------|------------|------------|------------|------------|------------|------------|------------|------------|------------|------------|------------|------------|------------|------------|------------|------------|------------|------------|------------|------------|------------|------------|------------|------------|------------|------------|------------|------------|------------|------------|------------|------------|------------|------------|------------|------------|------------|------------|------------|------------|------------|------------|------------|------------|------------|------------|------------|------------|------------|------------|------------|------------|------------|------------|------------|------------|------------|------------|------------|------------|------------|------------|------------|------------|------------|------------|------------|------------|------------|------------|------------|------------|------------|------------|------------|------------|------------|------------|------------|------------|------------|------------|------------|------------|------------|------------|------------|------------|------------|------------|------------|------------|------------|------------|------------|------------|------------|------------|------------|------------|------------|------------|------------|------------|------------|------------|------------|------------|------------|------------|------------|------------|------------|------------|------------|------------|------------|------------|------------|------------|------------|------------|------------|------------|------------|------------|------------|------------|------------|------------|------------|------------|------------|------------|------------|------------|------------|------------|------------|------------|------------|------------|------------|------------|------------|------------|------------|------------|------------|------------|------------|------------|------------|------------|------------|------------|------------|------------|------------|------------|------------|------------|------------|------------|------------|------------|------------|------------|------------|------------|------------|------------|------------|------------|------------|------------|------------|------------|------------|------------|------------|------------|------------|------------|------------|------------|------------|------------|------------|------------|------------|------------|------------|------------|------------|------------|------------|------------|------------|------------|------------|------------|------------|------------|------------|------------|------------|------------|------------|------------|------------|------------|------------|------------|------------|------------|------------|------------|------------|------------|------------|------------|------------|------------|------------|------------|------------|------------|------------|------------|------------|------------|------------|------------|------------|------------|------------|------------|------------|------------|------------|------------|------------|------------|------------|------------|------------|------------|------------|------------|------------|------------|------------|------------|------------|------------|------------|------------|------------|------------|------------|------------|------------|------------|------------|------------|------------|------------|------------|------------|------------|------------|------------|------------|------------|------------|------------|------------|------------|------------|------------|------------|------------|------------|------------|------------|------------|------------|------------|------------|------------|------------|------------|------------|------------|------------|------------|------------|------------|------------|------------|------------|------------|------------|------------|------------|------------|------------|------------|------------|------------|------------|------------|------------|------------|------------|------------|------------|------------|------------|------------|------------|------------|------------|------------|------------|------------|------------|------------|------------|------------|------------|------------|------------|------------|------------|------------|------------|------------|------------|------------|------------|------------|------------|------------|------------|------------|------------|------------|------------|------------|
| 1 | 0.00240003 | 0.00149054 | 0.00126126 | 0.00104543 | 0.00086986 | 0.00072824 | 0.00061674 | 0.00053024 | 0.00046464 | 0.00041536 | 0.00037824 | 0.00034944 | 0.00032544 | 0.00030528 | 0.00028896 | 0.00027504 | 0.00026304 | 0.00025248 | 0.00024336 | 0.00023472 | 0.00022656 | 0.00021888 | 0.00021168 | 0.00020496 | 0.00019872 | 0.00019296 | 0.00018768 | 0.00018288 | 0.00017856 | 0.00017472 | 0.00017136 | 0.00016848 | 0.00016608 | 0.00016416 | 0.00016272 | 0.00016176 | 0.00016112 | 0.00016080 | 0.00016064 | 0.00016080 | 0.00016112 | 0.00016168 | 0.00016248 | 0.00016352 | 0.00016480 | 0.00016632 | 0.00016800 | 0.00016984 | 0.00017184 | 0.00017400 | 0.00017632 | 0.00017880 | 0.00018144 | 0.00018424 | 0.00018720 | 0.00019032 | 0.00019360 | 0.00019704 | 0.00019872 | 0.00019872 | 0.00019872 | 0.00019872 | 0.00019872 | 0.00019872 | 0.00019872 | 0.00019872 | 0.00019872 | 0.00019872 | 0.00019872 | 0.00019872 | 0.00019872 | 0.00019872 | 0.00019872 | 0.00019872 | 0.00019872 | 0.00019872 | 0.00019872 | 0.00019872 | 0.00019872 | 0.00019872 | 0.00019872 | 0.00019872 | 0.00019872 | 0.00019872 | 0.00019872 | 0.00019872 | 0.00019872 | 0.00019872 | 0.00019872 | 0.00019872 | 0.00019872 | 0.00019872 | 0.00019872 | 0.00019872 | 0.00019872 | 0.00019872 | 0.00019872 | 0.00019872 | 0.00019872 | 0.00019872 | 0.00019872 | 0.00019872 | 0.00019872 | 0.00019872 | 0.00019872 | 0.00019872 | 0.00019872 | 0.00019872 | 0.00019872 | 0.00019872 | 0.00019872 | 0.00019872 | 0.00019872 | 0.00019872 | 0.00019872 | 0.00019872 | 0.00019872 | 0.00019872 | 0.00019872 | 0.00019872 | 0.00019872 | 0.00019872 | 0.00019872 | 0.00019872 | 0.00019872 | 0.00019872 | 0.00019872 | 0.00019872 | 0.00019872 | 0.00019872 | 0.00019872 | 0.00019872 | 0.00019872 | 0.00019872 | 0.00019872 | 0.00019872 | 0.00019872 | 0.00019872 | 0.00019872 | 0.00019872 | 0.00019872 | 0.00019872 | 0.00019872 | 0.00019872 | 0.00019872 | 0.00019872 | 0.00019872 | 0.00019872 | 0.00019872 | 0.00019872 | 0.00019872 | 0.00019872 | 0.00019872 | 0.00019872 | 0.00019872 | 0.00019872 | 0.00019872 | 0.00019872 | 0.00019872 | 0.00019872 | 0.00019872 | 0.00019872 | 0.00019872 | 0.00019872 | 0.00019872 | 0.00019872 | 0.00019872 | 0.00019872 | 0.00019872 | 0.00019872 | 0.00019872 | 0.00019872 | 0.00019872 | 0.00019872 | 0.00019872 | 0.00019872 | 0.00019872 | 0.00019872 | 0.00019872 | 0.00019872 | 0.00019872 | 0.00019872 | 0.00019872 | 0.00019872 | 0.00019872 | 0.00019872 | 0.00019872 | 0.00019872 | 0.00019872 | 0.00019872 | 0.00019872 | 0.00019872 | 0.00019872 | 0.00019872 | 0.00019872 | 0.00019872 | 0.00019872 | 0.00019872 | 0.00019872 | 0.00019872 | 0.00019872 | 0.00019872 | 0.00019872 | 0.00019872 | 0.00019872 | 0.00019872 | 0.00019872 | 0.00019872 | 0.00019872 | 0.00019872 | 0.00019872 | 0.00019872 | 0.00019872 | 0.00019872 | 0.00019872 | 0.00019872 | 0.00019872 | 0.00019872 | 0.00019872 | 0.00019872 | 0.00019872 | 0.00019872 | 0.00019872 | 0.00019872 | 0.00019872 | 0.00019872 | 0.00019872 | 0.00019872 | 0.00019872 | 0.00019872 | 0.00019872 | 0.00019872 | 0.00019872 | 0.00019872 | 0.00019872 | 0.00019872 | 0.00019872 | 0.00019872 | 0.00019872 | 0.00019872 | 0.00019872 | 0.00019872 | 0.00019872 | 0.00019872 | 0.00019872 | 0.00019872 | 0.00019872 | 0.00019872 | 0.00019872 | 0.00019872 | 0.00019872 | 0.00019872 | 0.00019872 | 0.00019872 | 0.00019872 | 0.00019872 | 0.00019872 | 0.00019872 | 0.00019872 | 0.00019872 | 0.00019872 | 0.00019872 | 0.00019872 | 0.00019872 | 0.00019872 | 0.00019872 | 0.00019872 | 0.00019872 | 0.00019872 | 0.00019872 | 0.00019872 | 0.00019872 | 0.00019872 | 0.00019872 | 0.00019872 | 0.00019872 | 0.00019872 | 0.00019872 | 0.00019872 | 0.00019872 | 0.00019872 | 0.00019872 | 0.00019872 | 0.00019872 | 0.00019872 | 0.00019872 | 0.00019872 | 0.00019872 | 0.00019872 | 0.00019872 | 0.00019872 | 0.00019872 | 0.00019872 | 0.00019872 | 0.00019872 | 0.00019872 | 0.00019872 | 0.00019872 | 0.00019872 | 0.00019872 | 0.00019872 | 0.00019872 | 0.00019872 | 0.00019872 | 0.00019872 | 0.00019872 | 0.00019872 | 0.00019872 | 0.00019872 | 0.00019872 | 0.00019872 | 0.00019872 | 0.00019872 | 0.00019872 | 0.00019872 | 0.00019872 | 0.00019872 | 0.00019872 | 0.00019872 | 0.00019872 | 0.00019872 | 0.00019872 | 0.00019872 | 0.00019872 | 0.00019872 | 0.00019872 | 0.00019872 | 0.00019872 | 0.00019872 | 0.00019872 | 0.00019872 | 0.00019872 | 0.00019872 | 0.00019872 | 0.00019872 | 0.00019872 | 0.00019872 | 0.00019872 | 0.00019872 | 0.00019872 | 0.00019872 | 0.00019872 | 0.00019872 | 0.00019872 | 0.00019872 | 0.00019872 | 0.00019872 | 0.00019872 | 0.00019872 | 0.00019872 | 0.00019872 | 0.00019872 | 0.00019872 | 0.00019872 | 0.00019872 | 0.00019872 | 0.00019872 | 0.00019872 | 0.00019872 | 0.00019872 | 0.00019872 | 0.00019872 | 0.00019872 | 0.00019872 | 0.00019872 | 0.00019872 | 0.00019872 | 0.00019872 | 0.00019872 | 0.00019872 | 0.00019872 | 0.00019872 | 0.00019872 | 0.00019872 | 0.00019872 | 0.00019872 | 0.00019872 | 0.00019872 | 0.00019872 | 0.00019872 | 0.00019872 | 0.00019872 | 0.00019872 | 0.00019872 | 0.00019872 | 0.00019872 | 0.00019872 | 0.00019872 | 0.00019872 | 0.00019872 | 0.00019872 | 0.00019872 | 0.00019872 | 0.00019872 | 0.00019872 | 0.00019872 | 0.00019872 | 0.00019872 | 0.00019872 | 0.00019872 | 0.00019872 | 0.00019872 | 0.00019872 | 0.00019872 | 0.00019872 | 0.00019872 | 0.00019872 | 0.00019872 | 0.00019872 | 0.00019872 | 0.00019872 | 0.00019872 | 0.00019872 | 0.00019872 | 0.00019872 | 0.00019872 | 0.00019872 | 0.00019872 | 0.00019872 | 0.00019872 | 0.00019872 | 0.00019872 | 0.00019872 | 0.00019872 | 0.00019872 | 0.00019872 | 0.00019872 | 0.00019872 | 0.00019872 | 0.00019872 | 0.00019872 | 0.00019872 | 0.00019872 | 0.00019872 | 0.00019872 | 0.00019872 | 0.00019872 | 0.00019872 | 0.00019872 | 0.00019872 | 0.00019872 | 0.00019872 | 0.00019872 | 0.00019872 | 0.00019872 | 0.00019872 | 0.00019872 | 0.00019872 | 0.00019872 | 0.00019872 | 0.00019872 | 0.00019872 | 0.00019872 | 0.00019872 | 0.00019872 | 0.00019872 | 0.00019872 | 0.00019872 | 0.00019872 | 0.00019872 | 0.00019872 | 0.00019872 | 0.00019872 | 0.00019872 | 0.00019872 | 0.00019872 | 0.00019872 | 0.00019872 | 0.00019872 | 0.00019872 | 0.00019872 | 0.00019872 | 0.00019872 | 0.00019872 | 0.00019872 | 0.00019872 | 0.00019872 | 0.00019872 | 0.00019872 | 0.00019872 | 0.00019872 | 0.00019872 | 0.00019872 | 0.00019872 | 0.00019872 | 0.00019872 | 0.00019872 | 0.00019872 | 0.00019872 | 0.00019872 | 0.00019872 | 0.00019872 | 0.00019872 | 0.00019872 | 0.00019872 | 0.00019872 | 0.00019872 | 0.00019872 | 0.00019872 | 0.00019872 | 0.00019872 | 0.00019872 | 0.00019872 | 0.00019872 | 0.00019872 | 0.00019872 | 0.00019872 | 0.00019872 | 0.00019872 | 0.00019872 | 0.00019872 | 0.00019872 | 0.00019872 | 0.00019872 | 0.00019872 | 0.00019872 | 0.00019872 | 0.00019872 | 0.00019872 | 0.00019872 | 0.00019872 | 0.00019872 | 0.00019872 | 0.00019872 | 0.00019872 | 0.00019872 | 0.00019872 | 0.00019872 | 0.00019872 | 0.00019872 | 0.00019872 | 0.00019872 | 0.00019872 | 0.00019872 | 0.00019872 | 0.00019872 | 0.00019872 | 0.00019872 | 0.00019872 | 0.00019872 | 0.00019872 | 0.00019872 | 0.00019872 | 0.00019872 | 0.00019872 | 0.00019872 | 0.00019872 | 0.00019872 | 0.00019872 | 0.00019872 | 0.00019872 | 0.00019872 | 0.00019872 | 0.00019872 | 0.00019872 | 0.00019872 | 0.00019872 | 0.00019872 | 0.00019872 | 0.00019872 | 0.00019872 | 0.00019872 | 0.00019872 | 0.00019872 | 0.00019872 | 0.00019872 | 0.00019872 | 0.00019872 | 0.00019872 | 0.00019872 | 0.00019872 | 0.00019872 | 0.00019872 | 0.00019872 | 0.00019872 | 0.00019872 | 0.00019872 | 0.00019872 | 0.00019872 | 0.00019872 | 0.00019872 | 0.00019872 | 0.00019872 | 0.00019872 | 0.00019872 | 0.00019872 | 0.00019872 | 0.00019872 | 0.00019872 | 0.00019872 | 0.00019872 | 0.00019872 | 0.00019872 | 0.00019872 | 0.00019872 | 0.00019872 | 0.00019872 | 0.00019872 | 0.00019872 | 0.00019872 | 0.00019872 | 0.00019872 | 0.00019872 | 0.00019872 | 0.00019872 | 0.00019872 | 0.00019872 | 0.00019872 | 0.00019872 | 0.00019872 | 0.00019872 | 0.00019872 | 0.00019872 | 0.00019872 | 0.00019872 | 0.00019872 | 0.00019872 | 0.00019872 | 0.00019872 | 0.00019872 | 0.00019872 | 0.00019872 | 0.00019872 | 0.00019872 | 0.00019872 | 0.00019872 | 0.00019872 | 0.00019872 | 0.00019872 | 0.00019872 | 0.00019872 | 0.00019872 | 0.00019872 | 0.00019872 | 0.00019872 |

[illegible]

[illegible]



|   | A          |            |            |            | B          |            |            |            | C          |            |            |            | D          |            |            |            | E          |            |            |            | F          |            |            |            | G          |            |            |            | H          |            |            |            | I          |            |            |            | J          |            |            |            | K          |            |            |            | L          |            |            |            | M          |            |            |            | N          |            |            |            | O          |            |            |            | P          |            |            |            | Q          |            |            |            | R          |            |            |            | S          |            |            |            | T          |            |            |            | U          |            |            |            | V          |            |            |            | W          |            |            |            | X          |            |            |            | Y          |            |            |            | Z          |            |            |            | AA         |            |            |            | AB         |            |            |            | AC         |            |            |            | AD         |            |            |            | AE         |            |            |            | AF         |            |            |            | AG         |            |            |            | AH         |            |            |            | AI         |            |            |            | AJ         |            |            |            | AK         |            |            |            | AL         |            |            |            | AM         |            |            |            | AN         |            |            |            | AO         |            |            |            | AP         |            |            |            | AQ         |            |            |            | AR         |            |            |            | AS         |            |            |            | AT         |            |            |            | AU         |            |            |            | AV         |            |            |            | AW         |            |            |            | AX         |            |            |            | AY         |            |            |            | AZ         |            |            |            | BA         |            |            |            | BB         |            |            |            | BC         |            |            |            | BD         |            |            |            | BE         |            |            |            | BF         |            |            |            | BG         |            |            |            | BH         |            |            |            | BI         |            |            |            | BJ         |            |            |            | BK         |            |            |            | BL         |            |            |            | BM         |            |            |            | BN         |            |            |            | BO         |            |            |            | BP         |            |            |            | BQ         |            |            |            | BR         |            |            |            | BS         |            |            |            | BT         |            |            |            | BU         |            |            |            | BV         |            |            |            | BW         |            |            |            | BX         |            |            |            | BY         |            |            |            | BZ         |            |            |            | CA         |            |            |            | CB         |            |            |            | CC         |            |            |            | CD         |            |            |            | CE         |            |            |            | CF         |            |            |            | CG         |            |            |            | CH         |            |            |            | CI         |            |            |            | CJ         |            |            |            | CK         |            |            |            | CL         |            |            |            | CM         |            |            |            | CN         |            |            |            | CO         |            |            |            | CP         |            |            |            | CQ         |            |            |            | CR         |            |            |            | CS         |            |            |            | CT         |            |            |            | CU         |            |            |            | CV         |            |            |            | CW         |            |            |            | CX         |            |            |            |            |            |            |            |            |            |            |            |            |            |            |            |            |            |            |            |            |            |            |            |            |            |            |            |            |            |            |            |            |            |            |            |            |            |            |            |            |            |            |            |            |            |            |            |            |            |            |            |            |            |            |            |            |            |            |            |            |            |            |            |            |            |            |            |            |            |            |            |            |            |            |            |            |            |            |            |            |            |            |            |            |            |            |            |            |            |            |            |            |            |            |            |            |            |            |            |            |            |            |            |            |            |            |            |            |            |            |            |            |            |            |            |            |            |            |
|---|------------|------------|------------|------------|------------|------------|------------|------------|------------|------------|------------|------------|------------|------------|------------|------------|------------|------------|------------|------------|------------|------------|------------|------------|------------|------------|------------|------------|------------|------------|------------|------------|------------|------------|------------|------------|------------|------------|------------|------------|------------|------------|------------|------------|------------|------------|------------|------------|------------|------------|------------|------------|------------|------------|------------|------------|------------|------------|------------|------------|------------|------------|------------|------------|------------|------------|------------|------------|------------|------------|------------|------------|------------|------------|------------|------------|------------|------------|------------|------------|------------|------------|------------|------------|------------|------------|------------|------------|------------|------------|------------|------------|------------|------------|------------|------------|------------|------------|------------|------------|------------|------------|------------|------------|------------|------------|------------|------------|------------|------------|------------|------------|------------|------------|------------|------------|------------|------------|------------|------------|------------|------------|------------|------------|------------|------------|------------|------------|------------|------------|------------|------------|------------|------------|------------|------------|------------|------------|------------|------------|------------|------------|------------|------------|------------|------------|------------|------------|------------|------------|------------|------------|------------|------------|------------|------------|------------|------------|------------|------------|------------|------------|------------|------------|------------|------------|------------|------------|------------|------------|------------|------------|------------|------------|------------|------------|------------|------------|------------|------------|------------|------------|------------|------------|------------|------------|------------|------------|------------|------------|------------|------------|------------|------------|------------|------------|------------|------------|------------|------------|------------|------------|------------|------------|------------|------------|------------|------------|------------|------------|------------|------------|------------|------------|------------|------------|------------|------------|------------|------------|------------|------------|------------|------------|------------|------------|------------|------------|------------|------------|------------|------------|------------|------------|------------|------------|------------|------------|------------|------------|------------|------------|------------|------------|------------|------------|------------|------------|------------|------------|------------|------------|------------|------------|------------|------------|------------|------------|------------|------------|------------|------------|------------|------------|------------|------------|------------|------------|------------|------------|------------|------------|------------|------------|------------|------------|------------|------------|------------|------------|------------|------------|------------|------------|------------|------------|------------|------------|------------|------------|------------|------------|------------|------------|------------|------------|------------|------------|------------|------------|------------|------------|------------|------------|------------|------------|------------|------------|------------|------------|------------|------------|------------|------------|------------|------------|------------|------------|------------|------------|------------|------------|------------|------------|------------|------------|------------|------------|------------|------------|------------|------------|------------|------------|------------|------------|------------|------------|------------|------------|------------|------------|------------|------------|------------|------------|------------|------------|------------|------------|------------|------------|------------|------------|------------|------------|------------|------------|------------|------------|------------|------------|------------|------------|------------|------------|------------|------------|------------|------------|------------|------------|------------|------------|------------|------------|------------|------------|------------|------------|------------|------------|------------|------------|------------|------------|------------|------------|------------|------------|------------|------------|------------|------------|------------|------------|------------|------------|------------|------------|------------|------------|------------|------------|------------|------------|------------|------------|------------|------------|------------|------------|------------|------------|------------|------------|------------|------------|------------|------------|------------|------------|------------|------------|------------|------------|------------|------------|------------|------------|------------|------------|------------|------------|------------|------------|------------|------------|------------|------------|------------|------------|------------|------------|------------|------------|------------|------------|------------|------------|------------|------------|------------|------------|------------|------------|------------|------------|------------|------------|------------|------------|------------|------------|------------|------------|------------|------------|------------|------------|------------|------------|------------|------------|------------|------------|------------|------------|------------|------------|------------|------------|------------|------------|------------|------------|------------|------------|------------|------------|------------|------------|------------|------------|------------|------------|------------|------------|------------|------------|------------|------------|------------|------------|------------|------------|------------|------------|------------|------------|------------|------------|------------|------------|------------|------------|------------|------------|------------|------------|------------|------------|------------|
| A | 0.00176525 | 0.00176525 | 0.00176525 | 0.00176525 | 0.00176525 | 0.00176525 | 0.00176525 | 0.00176525 | 0.00176525 | 0.00176525 | 0.00176525 | 0.00176525 | 0.00176525 | 0.00176525 | 0.00176525 | 0.00176525 | 0.00176525 | 0.00176525 | 0.00176525 | 0.00176525 | 0.00176525 | 0.00176525 | 0.00176525 | 0.00176525 | 0.00176525 | 0.00176525 | 0.00176525 | 0.00176525 | 0.00176525 | 0.00176525 | 0.00176525 | 0.00176525 | 0.00176525 | 0.00176525 | 0.00176525 | 0.00176525 | 0.00176525 | 0.00176525 | 0.00176525 | 0.00176525 | 0.00176525 | 0.00176525 | 0.00176525 | 0.00176525 | 0.00176525 | 0.00176525 | 0.00176525 | 0.00176525 | 0.00176525 | 0.00176525 | 0.00176525 | 0.00176525 | 0.00176525 | 0.00176525 | 0.00176525 | 0.00176525 | 0.00176525 | 0.00176525 | 0.00176525 | 0.00176525 | 0.00176525 | 0.00176525 | 0.00176525 | 0.00176525 | 0.00176525 | 0.00176525 | 0.00176525 | 0.00176525 | 0.00176525 | 0.00176525 | 0.00176525 | 0.00176525 | 0.00176525 | 0.00176525 | 0.00176525 | 0.00176525 | 0.00176525 | 0.00176525 | 0.00176525 | 0.00176525 | 0.00176525 | 0.00176525 | 0.00176525 | 0.00176525 | 0.00176525 | 0.00176525 | 0.00176525 | 0.00176525 | 0.00176525 | 0.00176525 | 0.00176525 | 0.00176525 | 0.00176525 | 0.00176525 | 0.00176525 | 0.00176525 | 0.00176525 | 0.00176525 | 0.00176525 | 0.00176525 | 0.00176525 | 0.00176525 | 0.00176525 | 0.00176525 | 0.00176525 | 0.00176525 | 0.00176525 | 0.00176525 | 0.00176525 | 0.00176525 | 0.00176525 | 0.00176525 | 0.00176525 | 0.00176525 | 0.00176525 | 0.00176525 | 0.00176525 | 0.00176525 | 0.00176525 | 0.00176525 | 0.00176525 | 0.00176525 | 0.00176525 | 0.00176525 | 0.00176525 | 0.00176525 | 0.00176525 | 0.00176525 | 0.00176525 | 0.00176525 | 0.00176525 | 0.00176525 | 0.00176525 | 0.00176525 | 0.00176525 | 0.00176525 | 0.00176525 | 0.00176525 | 0.00176525 | 0.00176525 | 0.00176525 | 0.00176525 | 0.00176525 | 0.00176525 | 0.00176525 | 0.00176525 | 0.00176525 | 0.00176525 | 0.00176525 | 0.00176525 | 0.00176525 | 0.00176525 | 0.00176525 | 0.00176525 | 0.00176525 | 0.00176525 | 0.00176525 | 0.00176525 | 0.00176525 | 0.00176525 | 0.00176525 | 0.00176525 | 0.00176525 | 0.00176525 | 0.00176525 | 0.00176525 | 0.00176525 | 0.00176525 | 0.00176525 | 0.00176525 | 0.00176525 | 0.00176525 | 0.00176525 | 0.00176525 | 0.00176525 | 0.00176525 | 0.00176525 | 0.00176525 | 0.00176525 | 0.00176525 | 0.00176525 | 0.00176525 | 0.00176525 | 0.00176525 | 0.00176525 | 0.00176525 | 0.00176525 | 0.00176525 | 0.00176525 | 0.00176525 | 0.00176525 | 0.00176525 | 0.00176525 | 0.00176525 | 0.00176525 | 0.00176525 | 0.00176525 | 0.00176525 | 0.00176525 | 0.00176525 | 0.00176525 | 0.00176525 | 0.00176525 | 0.00176525 | 0.00176525 | 0.00176525 | 0.00176525 | 0.00176525 | 0.00176525 | 0.00176525 | 0.00176525 | 0.00176525 | 0.00176525 | 0.00176525 | 0.00176525 | 0.00176525 | 0.00176525 | 0.00176525 | 0.00176525 | 0.00176525 | 0.00176525 | 0.00176525 | 0.00176525 | 0.00176525 | 0.00176525 | 0.00176525 | 0.00176525 | 0.00176525 | 0.00176525 | 0.00176525 | 0.00176525 | 0.00176525 | 0.00176525 | 0.00176525 | 0.00176525 | 0.00176525 | 0.00176525 | 0.00176525 | 0.00176525 | 0.00176525 | 0.00176525 | 0.00176525 | 0.00176525 | 0.00176525 | 0.00176525 | 0.00176525 | 0.00176525 | 0.00176525 | 0.00176525 | 0.00176525 | 0.00176525 | 0.00176525 | 0.00176525 | 0.00176525 | 0.00176525 | 0.00176525 | 0.00176525 | 0.00176525 | 0.00176525 | 0.00176525 | 0.00176525 | 0.00176525 | 0.00176525 | 0.00176525 | 0.00176525 | 0.00176525 | 0.00176525 | 0.00176525 | 0.00176525 | 0.00176525 | 0.00176525 | 0.00176525 | 0.00176525 | 0.00176525 | 0.00176525 | 0.00176525 | 0.00176525 | 0.00176525 | 0.00176525 | 0.00176525 | 0.00176525 | 0.00176525 | 0.00176525 | 0.00176525 | 0.00176525 | 0.00176525 | 0.00176525 | 0.00176525 | 0.00176525 | 0.00176525 | 0.00176525 | 0.00176525 | 0.00176525 | 0.00176525 | 0.00176525 | 0.00176525 | 0.00176525 | 0.00176525 | 0.00176525 | 0.00176525 | 0.00176525 | 0.00176525 | 0.00176525 | 0.00176525 | 0.00176525 | 0.00176525 | 0.00176525 | 0.00176525 | 0.00176525 | 0.00176525 | 0.00176525 | 0.00176525 | 0.00176525 | 0.00176525 | 0.00176525 | 0.00176525 | 0.00176525 | 0.00176525 | 0.00176525 | 0.00176525 | 0.00176525 | 0.00176525 | 0.00176525 | 0.00176525 | 0.00176525 | 0.00176525 | 0.00176525 | 0.00176525 | 0.00176525 | 0.00176525 | 0.00176525 | 0.00176525 | 0.00176525 | 0.00176525 | 0.00176525 | 0.00176525 | 0.00176525 | 0.00176525 | 0.00176525 | 0.00176525 | 0.00176525 | 0.00176525 | 0.00176525 | 0.00176525 | 0.00176525 | 0.00176525 | 0.00176525 | 0.00176525 | 0.00176525 | 0.00176525 | 0.00176525 | 0.00176525 | 0.00176525 | 0.00176525 | 0.00176525 | 0.00176525 | 0.00176525 | 0.00176525 | 0.00176525 | 0.00176525 | 0.00176525 | 0.00176525 | 0.00176525 | 0.00176525 | 0.00176525 | 0.00176525 | 0.00176525 | 0.00176525 | 0.00176525 | 0.00176525 | 0.00176525 | 0.00176525 | 0.00176525 | 0.00176525 | 0.00176525 | 0.00176525 | 0.00176525 | 0.00176525 | 0.00176525 | 0.00176525 | 0.00176525 | 0.00176525 | 0.00176525 | 0.00176525 | 0.00176525 | 0.00176525 | 0.00176525 | 0.00176525 | 0.00176525 | 0.00176525 | 0.00176525 | 0.00176525 | 0.00176525 | 0.00176525 | 0.00176525 | 0.00176525 | 0.00176525 | 0.00176525 | 0.00176525 | 0.00176525 | 0.00176525 | 0.00176525 | 0.00176525 | 0.00176525 | 0.00176525 | 0.00176525 | 0.00176525 | 0.00176525 | 0.00176525 | 0.00176525 | 0.00176525 | 0.00176525 | 0.00176525 | 0.00176525 | 0.00176525 | 0.00176525 | 0.00176525 | 0.00176525 | 0.00176525 | 0.00176525 | 0.00176525 | 0.00176525 | 0.00176525 | 0.00176525 | 0.00176525 | 0.00176525 | 0.00176525 | 0.00176525 | 0.00176525 | 0.00176525 | 0.00176525 | 0.00176525 | 0.00176525 | 0.00176525 | 0.00176525 | 0.00176525 | 0.00176525 | 0.00176525 | 0.00176525 | 0.00176525 | 0.00176525 | 0.00176525 | 0.00176525 | 0.00176525 | 0.00176525 | 0.00176525 | 0.00176525 | 0.00176525 | 0.00176525 | 0.00176525 | 0.00176525 | 0.00176525 | 0.00176525 | 0.00176525 | 0.00176525 | 0.00176525 | 0.00176525 | 0.00176525 | 0.00176525 | 0.00176525 | 0.00176525 | 0.00176525 | 0.00176525 | 0.00176525 | 0.00176525 | 0.00176525 | 0.00176525 | 0.00176525 | 0.00176525 | 0.00176525 | 0.00176525 | 0.00176525 | 0.00176525 | 0.00176525 | 0.00176525 | 0.00176525 | 0.00176525 | 0.00176525 | 0.00176525 | 0.00176525 | 0.00176525 | 0.00176525 | 0.00176525 | 0.00176525 | 0.00176525 | 0.00176525 | 0.00176525 | 0.00176525 | 0.00176525 | 0.00176525 | 0.00176525 | 0.00176525 | 0.00176525 | 0.00176525 | 0.00176525 | 0.00176525 | 0.00176525 | 0.00176525 | 0.00176525 | 0.00176525 | 0.00176525 | 0.00176525 | 0.00176525 | 0.00176525 | 0.00176525 | 0.00176525 | 0.00176525 | 0.00176525 | 0.00176525 | 0.00176525 | 0.00176525 | 0.00176525 | 0.00176525 | 0.00176525 | 0.00176525 | 0.00176525 | 0.00176525 | 0.00176525 | 0.00176525 | 0.00176525 | 0.00176525 | 0.00176525 | 0.00176525 |

|   | A          |            |            |            | B          |            |            |            | C          |            |            |            | D          |            |            |            | E          |            |            |            | F          |            |            |            | G          |            |            |            | H          |            |            |            | I          |            |            |            | J          |            |            |            | K          |            |            |            | L          |            |            |            | M          |            |            |            | N          |            |            |            | O          |            |            |            | P          |            |            |            | Q          |            |            |            | R          |            |            |            | S          |            |            |            | T          |            |            |            | U          |            |            |            | V          |            |            |            | W          |            |            |            | X          |            |            |            | Y          |            |            |            | Z          |            |            |            | AA         |            |            |            | AB         |            |            |            | AC         |            |            |            | AD         |            |            |            | AE         |            |            |            | AF         |            |            |            | AG         |            |            |            | AH         |            |            |            | AI         |            |            |            | AJ         |            |            |            | AK         |            |            |            | AL         |            |            |            | AM         |            |            |            | AN         |            |            |            | AO         |            |            |            | AP         |            |            |            | AQ         |            |            |            | AR         |            |            |            | AS         |            |            |            | AT         |            |            |            | AU         |            |            |            | AV         |            |            |            | AW         |            |            |            | AX         |            |            |            | AY         |            |            |            | AZ         |            |            |            | BA         |            |            |            | BB         |            |            |            | BC         |            |            |            | BD         |            |            |            | BE         |            |            |            | BF         |            |            |            | BG         |            |            |            | BH         |            |            |            | BI         |            |            |            | BJ         |            |            |            | BK         |            |            |            | BL         |            |            |            | BM         |            |            |            | BN         |            |            |            | BO         |            |            |            | BP         |            |            |            | BQ         |            |            |            | BR         |            |            |            | BS         |            |            |            | BT         |            |            |            | BU         |            |            |            | BV         |            |            |            | BW         |            |            |            | BX         |            |            |            | BY         |            |            |            | BZ         |            |            |            | CA         |            |            |            | CB         |            |            |            | CC         |            |            |            | CD         |            |            |            | CE         |            |            |            | CF         |            |            |            | CG         |            |            |            | CH         |            |            |            | CI         |            |            |            | CJ         |            |            |            | CK         |            |            |            | CL         |            |            |            | CM         |            |            |            | CN         |            |            |            | CO         |            |            |            | CP         |            |            |            | CQ         |            |            |            | CR         |            |            |            | CS         |            |            |            | CT         |            |            |            | CU         |            |            |            | CV         |            |            |            | CW         |            |            |            | CX         |            |            |            |            |            |            |            |            |            |            |            |            |            |            |            |            |            |            |            |            |            |            |            |            |            |            |            |            |            |            |            |            |            |            |            |            |            |            |            |            |            |            |            |            |            |            |            |            |            |            |            |            |            |            |            |            |            |            |            |            |            |            |            |            |            |            |            |            |            |            |            |            |            |            |            |            |            |            |            |            |            |            |            |            |            |            |            |            |            |            |            |            |            |            |            |            |            |            |            |            |            |            |            |            |            |            |            |            |            |            |            |            |            |            |            |            |            |            |   |
|---|------------|------------|------------|------------|------------|------------|------------|------------|------------|------------|------------|------------|------------|------------|------------|------------|------------|------------|------------|------------|------------|------------|------------|------------|------------|------------|------------|------------|------------|------------|------------|------------|------------|------------|------------|------------|------------|------------|------------|------------|------------|------------|------------|------------|------------|------------|------------|------------|------------|------------|------------|------------|------------|------------|------------|------------|------------|------------|------------|------------|------------|------------|------------|------------|------------|------------|------------|------------|------------|------------|------------|------------|------------|------------|------------|------------|------------|------------|------------|------------|------------|------------|------------|------------|------------|------------|------------|------------|------------|------------|------------|------------|------------|------------|------------|------------|------------|------------|------------|------------|------------|------------|------------|------------|------------|------------|------------|------------|------------|------------|------------|------------|------------|------------|------------|------------|------------|------------|------------|------------|------------|------------|------------|------------|------------|------------|------------|------------|------------|------------|------------|------------|------------|------------|------------|------------|------------|------------|------------|------------|------------|------------|------------|------------|------------|------------|------------|------------|------------|------------|------------|------------|------------|------------|------------|------------|------------|------------|------------|------------|------------|------------|------------|------------|------------|------------|------------|------------|------------|------------|------------|------------|------------|------------|------------|------------|------------|------------|------------|------------|------------|------------|------------|------------|------------|------------|------------|------------|------------|------------|------------|------------|------------|------------|------------|------------|------------|------------|------------|------------|------------|------------|------------|------------|------------|------------|------------|------------|------------|------------|------------|------------|------------|------------|------------|------------|------------|------------|------------|------------|------------|------------|------------|------------|------------|------------|------------|------------|------------|------------|------------|------------|------------|------------|------------|------------|------------|------------|------------|------------|------------|------------|------------|------------|------------|------------|------------|------------|------------|------------|------------|------------|------------|------------|------------|------------|------------|------------|------------|------------|------------|------------|------------|------------|------------|------------|------------|------------|------------|------------|------------|------------|------------|------------|------------|------------|------------|------------|------------|------------|------------|------------|------------|------------|------------|------------|------------|------------|------------|------------|------------|------------|------------|------------|------------|------------|------------|------------|------------|------------|------------|------------|------------|------------|------------|------------|------------|------------|------------|------------|------------|------------|------------|------------|------------|------------|------------|------------|------------|------------|------------|------------|------------|------------|------------|------------|------------|------------|------------|------------|------------|------------|------------|------------|------------|------------|------------|------------|------------|------------|------------|------------|------------|------------|------------|------------|------------|------------|------------|------------|------------|------------|------------|------------|------------|------------|------------|------------|------------|------------|------------|------------|------------|------------|------------|------------|------------|------------|------------|------------|------------|------------|------------|------------|------------|------------|------------|------------|------------|------------|------------|------------|------------|------------|------------|------------|------------|------------|------------|------------|------------|------------|------------|------------|------------|------------|------------|------------|------------|------------|------------|------------|------------|------------|------------|------------|------------|------------|------------|------------|------------|------------|------------|------------|------------|------------|------------|------------|------------|------------|------------|------------|------------|------------|------------|------------|------------|------------|------------|------------|------------|------------|------------|------------|------------|------------|------------|------------|------------|------------|------------|------------|------------|------------|------------|------------|------------|------------|------------|------------|------------|------------|------------|------------|------------|------------|------------|------------|------------|------------|------------|------------|------------|------------|------------|------------|------------|------------|------------|------------|------------|------------|------------|------------|------------|------------|------------|------------|------------|------------|------------|------------|------------|------------|------------|------------|------------|------------|------------|------------|------------|------------|------------|------------|------------|------------|------------|------------|------------|------------|------------|------------|------------|------------|------------|------------|------------|------------|------------|------------|------------|------------|------------|------------|------------|------------|------------|------------|------------|------------|------------|------------|------------|---|
| 1 | 0.00000000 | 0.00000000 | 0.00000000 | 0.00000000 | 0.00000000 | 0.00000000 | 0.00000000 | 0.00000000 | 0.00000000 | 0.00000000 | 0.00000000 | 0.00000000 | 0.00000000 | 0.00000000 | 0.00000000 | 0.00000000 | 0.00000000 | 0.00000000 | 0.00000000 | 0.00000000 | 0.00000000 | 0.00000000 | 0.00000000 | 0.00000000 | 0.00000000 | 0.00000000 | 0.00000000 | 0.00000000 | 0.00000000 | 0.00000000 | 0.00000000 | 0.00000000 | 0.00000000 | 0.00000000 | 0.00000000 | 0.00000000 | 0.00000000 | 0.00000000 | 0.00000000 | 0.00000000 | 0.00000000 | 0.00000000 | 0.00000000 | 0.00000000 | 0.00000000 | 0.00000000 | 0.00000000 | 0.00000000 | 0.00000000 | 0.00000000 | 0.00000000 | 0.00000000 | 0.00000000 | 0.00000000 | 0.00000000 | 0.00000000 | 0.00000000 | 0.00000000 | 0.00000000 | 0.00000000 | 0.00000000 | 0.00000000 | 0.00000000 | 0.00000000 | 0.00000000 | 0.00000000 | 0.00000000 | 0.00000000 | 0.00000000 | 0.00000000 | 0.00000000 | 0.00000000 | 0.00000000 | 0.00000000 | 0.00000000 | 0.00000000 | 0.00000000 | 0.00000000 | 0.00000000 | 0.00000000 | 0.00000000 | 0.00000000 | 0.00000000 | 0.00000000 | 0.00000000 | 0.00000000 | 0.00000000 | 0.00000000 | 0.00000000 | 0.00000000 | 0.00000000 | 0.00000000 | 0.00000000 | 0.00000000 | 0.00000000 | 0.00000000 | 0.00000000 | 0.00000000 | 0.00000000 | 0.00000000 | 0.00000000 | 0.00000000 | 0.00000000 | 0.00000000 | 0.00000000 | 0.00000000 | 0.00000000 | 0.00000000 | 0.00000000 | 0.00000000 | 0.00000000 | 0.00000000 | 0.00000000 | 0.00000000 | 0.00000000 | 0.00000000 | 0.00000000 | 0.00000000 | 0.00000000 | 0.00000000 | 0.00000000 | 0.00000000 | 0.00000000 | 0.00000000 | 0.00000000 | 0.00000000 | 0.00000000 | 0.00000000 | 0.00000000 | 0.00000000 | 0.00000000 | 0.00000000 | 0.00000000 | 0.00000000 | 0.00000000 | 0.00000000 | 0.00000000 | 0.00000000 | 0.00000000 | 0.00000000 | 0.00000000 | 0.00000000 | 0.00000000 | 0.00000000 | 0.00000000 | 0.00000000 | 0.00000000 | 0.00000000 | 0.00000000 | 0.00000000 | 0.00000000 | 0.00000000 | 0.00000000 | 0.00000000 | 0.00000000 | 0.00000000 | 0.00000000 | 0.00000000 | 0.00000000 | 0.00000000 | 0.00000000 | 0.00000000 | 0.00000000 | 0.00000000 | 0.00000000 | 0.00000000 | 0.00000000 | 0.00000000 | 0.00000000 | 0.00000000 | 0.00000000 | 0.00000000 | 0.00000000 | 0.00000000 | 0.00000000 | 0.00000000 | 0.00000000 | 0.00000000 | 0.00000000 | 0.00000000 | 0.00000000 | 0.00000000 | 0.00000000 | 0.00000000 | 0.00000000 | 0.00000000 | 0.00000000 | 0.00000000 | 0.00000000 | 0.00000000 | 0.00000000 | 0.00000000 | 0.00000000 | 0.00000000 | 0.00000000 | 0.00000000 | 0.00000000 | 0.00000000 | 0.00000000 | 0.00000000 | 0.00000000 | 0.00000000 | 0.00000000 | 0.00000000 | 0.00000000 | 0.00000000 | 0.00000000 | 0.00000000 | 0.00000000 | 0.00000000 | 0.00000000 | 0.00000000 | 0.00000000 | 0.00000000 | 0.00000000 | 0.00000000 | 0.00000000 | 0.00000000 | 0.00000000 | 0.00000000 | 0.00000000 | 0.00000000 | 0.00000000 | 0.00000000 | 0.00000000 | 0.00000000 | 0.00000000 | 0.00000000 | 0.00000000 | 0.00000000 | 0.00000000 | 0.00000000 | 0.00000000 | 0.00000000 | 0.00000000 | 0.00000000 | 0.00000000 | 0.00000000 | 0.00000000 | 0.00000000 | 0.00000000 | 0.00000000 | 0.00000000 | 0.00000000 | 0.00000000 | 0.00000000 | 0.00000000 | 0.00000000 | 0.00000000 | 0.00000000 | 0.00000000 | 0.00000000 | 0.00000000 | 0.00000000 | 0.00000000 | 0.00000000 | 0.00000000 | 0.00000000 | 0.00000000 | 0.00000000 | 0.00000000 | 0.00000000 | 0.00000000 | 0.00000000 | 0.00000000 | 0.00000000 | 0.00000000 | 0.00000000 | 0.00000000 | 0.00000000 | 0.00000000 | 0.00000000 | 0.00000000 | 0.00000000 | 0.00000000 | 0.00000000 | 0.00000000 | 0.00000000 | 0.00000000 | 0.00000000 | 0.00000000 | 0.00000000 | 0.00000000 | 0.00000000 | 0.00000000 | 0.00000000 | 0.00000000 | 0.00000000 | 0.00000000 | 0.00000000 | 0.00000000 | 0.00000000 | 0.00000000 | 0.00000000 | 0.00000000 | 0.00000000 | 0.00000000 | 0.00000000 | 0.00000000 | 0.00000000 | 0.00000000 | 0.00000000 | 0.00000000 | 0.00000000 | 0.00000000 | 0.00000000 | 0.00000000 | 0.00000000 | 0.00000000 | 0.00000000 | 0.00000000 | 0.00000000 | 0.00000000 | 0.00000000 | 0.00000000 | 0.00000000 | 0.00000000 | 0.00000000 | 0.00000000 | 0.00000000 | 0.00000000 | 0.00000000 | 0.00000000 | 0.00000000 | 0.00000000 | 0.00000000 | 0.00000000 | 0.00000000 | 0.00000000 | 0.00000000 | 0.00000000 | 0.00000000 | 0.00000000 | 0.00000000 | 0.00000000 | 0.00000000 | 0.00000000 | 0.00000000 | 0.00000000 | 0.00000000 | 0.00000000 | 0.00000000 | 0.00000000 | 0.00000000 | 0.00000000 | 0.00000000 | 0.00000000 | 0.00000000 | 0.00000000 | 0.00000000 | 0.00000000 | 0.00000000 | 0.00000000 | 0.00000000 | 0.00000000 | 0.00000000 | 0.00000000 | 0.00000000 | 0.00000000 | 0.00000000 | 0.00000000 | 0.00000000 | 0.00000000 | 0.00000000 | 0.00000000 | 0.00000000 | 0.00000000 | 0.00000000 | 0.00000000 | 0.00000000 | 0.00000000 | 0.00000000 | 0.00000000 | 0.00000000 | 0.00000000 | 0.00000000 | 0.00000000 | 0.00000000 | 0.00000000 | 0.00000000 | 0.00000000 | 0.00000000 | 0.00000000 | 0.00000000 | 0.00000000 | 0.00000000 | 0.00000000 | 0.00000000 | 0.00000000 | 0.00000000 | 0.00000000 | 0.00000000 | 0.00000000 | 0.00000000 | 0.00000000 | 0.00000000 | 0.00000000 | 0.00000000 | 0.00000000 | 0.00000000 | 0.00000000 | 0.00000000 | 0.00000000 | 0.00000000 | 0.00000000 | 0.00000000 | 0.00000000 | 0.00000000 | 0.00000000 | 0.00000000 | 0.00000000 | 0.00000000 | 0.00000000 | 0.00000000 | 0.00000000 | 0.00000000 | 0.00000000 | 0.00000000 | 0.00000000 | 0.00000000 | 0.00000000 | 0.00000000 | 0.00000000 | 0.00000000 | 0.00000000 | 0.00000000 | 0.00000000 | 0.00000000 | 0.00000000 | 0.00000000 | 0.00000000 | 0.00000000 | 0.00000000 | 0.00000000 | 0.00000000 | 0.00000000 | 0.00000000 | 0.00000000 | 0.00000000 | 0.00000000 | 0.00000000 | 0.00000000 | 0.00000000 | 0.00000000 | 0.00000000 | 0.00000000 | 0.00000000 | 0.00000000 | 0.00000000 | 0.00000000 | 0.00000000 | 0.00000000 | 0.00000000 | 0.00000000 | 0.00000000 | 0.00000000 | 0.00000000 | 0.00000000 | 0.00000000 | 0.00000000 | 0.00000000 | 0.00000000 | 0.00000000 | 0.00000000 | 0.00000000 | 0.00000000 | 0.00000000 | 0.00000000 | 0.00000000 | 0.00000000 | 0.00000000 | 0.00000000 | 0.00000000 | 0.00000000 | 0.00000000 | 0.00000000 | 0.00000000 | 0.00000000 | 0.00000000 | 0.00000000 | 0.00000000 | 0.00000000 | 0.00000000 | 0.00000000 | 0.00000000 | 0.00000000 | 0.00000000 | 0.00000000 | 0.00000000 | 0.00000000 | 0.00000000 | 0.00000000 | 0.00000000 | 0.00000000 | 0.00000000 | 0.00000000 | 0.00000000 | 0.00000000 | 0.00000000 | 0.00000000 | 0.00000000 | 0.00000000 | 0.00000000 | 0.00000000 | 0.00000000 | 0.00000000 | 0.00000000 | 0.00000000 | 0.00000000 | 0.00000000 | 0.00000000 | 0.00000000 | 0.00000000 | 0.00000000 | 0.00000000 | 0.00000000 | 0.00000000 | 0.00000000 | 0.00000000 | 0.00000000 | 0.00000000 | 0.00000000 | 0.00000000 | 0 |

|   | A          |            |            |            | B          |            |            |            | C          |            |            |            | D          |            |            |            | E          |            |            |            | F          |            |            |            | G          |            |            |            | H          |            |            |            | I          |            |            |            | J          |            |            |            | K          |            |            |            | L          |            |            |            | M          |            |            |            | N          |            |            |            | O          |            |            |            | P          |            |            |            | Q          |            |            |            | R          |            |            |            | S          |            |            |            | T          |            |            |            | U          |            |            |            | V          |            |            |            | W          |            |            |            | X          |            |            |            | Y          |            |            |            | Z          |            |            |            | AA         |            |            |            | AB         |            |            |            | AC         |            |            |            | AD         |            |            |            | AE         |            |            |            | AF         |            |            |            | AG         |            |            |            | AH         |            |            |            | AI         |            |            |            | AJ         |            |            |            | AK         |            |            |            | AL         |            |            |            | AM         |            |            |            | AN         |            |            |            | AO         |            |            |            | AP         |            |            |            | AQ         |            |            |            | AR         |            |            |            | AS         |            |            |            | AT         |            |            |            | AU         |            |            |            | AV         |            |            |            | AW         |            |            |            | AX         |            |            |            | AY         |            |            |            | AZ         |            |            |            | BA         |            |            |            | BB         |            |            |            | BC         |            |            |            | BD         |            |            |            | BE         |            |            |            | BF         |            |            |            | BG         |            |            |            | BH         |            |            |            | BI         |            |            |            | BJ         |            |            |            | BK         |            |            |            | BL         |            |            |            | BM         |            |            |            | BN         |            |            |            | BO         |            |            |            | BP         |            |            |            | BQ         |            |            |            | BR         |            |            |            | BS         |            |            |            | BT         |            |            |            | BU         |            |            |            | BV         |            |            |            | BW         |            |            |            | BX         |            |            |            | BY         |            |            |            | BZ         |            |            |            | CA         |            |            |            | CB         |            |            |            | CC         |            |            |            | CD         |            |            |            | CE         |            |            |            | CF         |            |            |            | CG         |            |            |            | CH         |            |            |            | CI         |            |            |            | CJ         |            |            |            | CK         |            |            |            | CL         |            |            |            | CM         |            |            |            | CN         |            |            |            | CO         |            |            |            | CP         |            |            |            | CQ         |            |            |            | CR         |            |            |            | CS         |            |            |            | CT         |            |            |            | CU         |            |            |            | CV         |            |            |            | CW         |            |            |            | CX         |            |            |            |            |            |            |            |            |            |            |            |            |            |            |            |            |            |            |            |            |            |            |            |            |            |            |            |            |            |            |            |            |            |            |            |            |            |            |            |            |            |            |            |            |            |            |            |            |            |            |            |            |            |            |            |            |            |            |            |            |            |            |            |            |            |            |            |            |            |            |            |            |            |            |            |            |            |            |            |            |            |            |            |            |            |            |            |            |            |            |            |            |            |            |            |            |            |            |            |            |            |            |            |            |            |            |            |            |            |            |            |            |            |            |            |            |            |            |   |
|---|------------|------------|------------|------------|------------|------------|------------|------------|------------|------------|------------|------------|------------|------------|------------|------------|------------|------------|------------|------------|------------|------------|------------|------------|------------|------------|------------|------------|------------|------------|------------|------------|------------|------------|------------|------------|------------|------------|------------|------------|------------|------------|------------|------------|------------|------------|------------|------------|------------|------------|------------|------------|------------|------------|------------|------------|------------|------------|------------|------------|------------|------------|------------|------------|------------|------------|------------|------------|------------|------------|------------|------------|------------|------------|------------|------------|------------|------------|------------|------------|------------|------------|------------|------------|------------|------------|------------|------------|------------|------------|------------|------------|------------|------------|------------|------------|------------|------------|------------|------------|------------|------------|------------|------------|------------|------------|------------|------------|------------|------------|------------|------------|------------|------------|------------|------------|------------|------------|------------|------------|------------|------------|------------|------------|------------|------------|------------|------------|------------|------------|------------|------------|------------|------------|------------|------------|------------|------------|------------|------------|------------|------------|------------|------------|------------|------------|------------|------------|------------|------------|------------|------------|------------|------------|------------|------------|------------|------------|------------|------------|------------|------------|------------|------------|------------|------------|------------|------------|------------|------------|------------|------------|------------|------------|------------|------------|------------|------------|------------|------------|------------|------------|------------|------------|------------|------------|------------|------------|------------|------------|------------|------------|------------|------------|------------|------------|------------|------------|------------|------------|------------|------------|------------|------------|------------|------------|------------|------------|------------|------------|------------|------------|------------|------------|------------|------------|------------|------------|------------|------------|------------|------------|------------|------------|------------|------------|------------|------------|------------|------------|------------|------------|------------|------------|------------|------------|------------|------------|------------|------------|------------|------------|------------|------------|------------|------------|------------|------------|------------|------------|------------|------------|------------|------------|------------|------------|------------|------------|------------|------------|------------|------------|------------|------------|------------|------------|------------|------------|------------|------------|------------|------------|------------|------------|------------|------------|------------|------------|------------|------------|------------|------------|------------|------------|------------|------------|------------|------------|------------|------------|------------|------------|------------|------------|------------|------------|------------|------------|------------|------------|------------|------------|------------|------------|------------|------------|------------|------------|------------|------------|------------|------------|------------|------------|------------|------------|------------|------------|------------|------------|------------|------------|------------|------------|------------|------------|------------|------------|------------|------------|------------|------------|------------|------------|------------|------------|------------|------------|------------|------------|------------|------------|------------|------------|------------|------------|------------|------------|------------|------------|------------|------------|------------|------------|------------|------------|------------|------------|------------|------------|------------|------------|------------|------------|------------|------------|------------|------------|------------|------------|------------|------------|------------|------------|------------|------------|------------|------------|------------|------------|------------|------------|------------|------------|------------|------------|------------|------------|------------|------------|------------|------------|------------|------------|------------|------------|------------|------------|------------|------------|------------|------------|------------|------------|------------|------------|------------|------------|------------|------------|------------|------------|------------|------------|------------|------------|------------|------------|------------|------------|------------|------------|------------|------------|------------|------------|------------|------------|------------|------------|------------|------------|------------|------------|------------|------------|------------|------------|------------|------------|------------|------------|------------|------------|------------|------------|------------|------------|------------|------------|------------|------------|------------|------------|------------|------------|------------|------------|------------|------------|------------|------------|------------|------------|------------|------------|------------|------------|------------|------------|------------|------------|------------|------------|------------|------------|------------|------------|------------|------------|------------|------------|------------|------------|------------|------------|------------|------------|------------|------------|------------|------------|------------|------------|------------|------------|------------|------------|------------|------------|------------|------------|------------|------------|------------|------------|------------|------------|------------|------------|------------|------------|------------|------------|------------|------------|------------|------------|------------|------------|------------|------------|------------|---|
| 1 | 0.00000000 | 0.00000000 | 0.00000000 | 0.00000000 | 0.00000000 | 0.00000000 | 0.00000000 | 0.00000000 | 0.00000000 | 0.00000000 | 0.00000000 | 0.00000000 | 0.00000000 | 0.00000000 | 0.00000000 | 0.00000000 | 0.00000000 | 0.00000000 | 0.00000000 | 0.00000000 | 0.00000000 | 0.00000000 | 0.00000000 | 0.00000000 | 0.00000000 | 0.00000000 | 0.00000000 | 0.00000000 | 0.00000000 | 0.00000000 | 0.00000000 | 0.00000000 | 0.00000000 | 0.00000000 | 0.00000000 | 0.00000000 | 0.00000000 | 0.00000000 | 0.00000000 | 0.00000000 | 0.00000000 | 0.00000000 | 0.00000000 | 0.00000000 | 0.00000000 | 0.00000000 | 0.00000000 | 0.00000000 | 0.00000000 | 0.00000000 | 0.00000000 | 0.00000000 | 0.00000000 | 0.00000000 | 0.00000000 | 0.00000000 | 0.00000000 | 0.00000000 | 0.00000000 | 0.00000000 | 0.00000000 | 0.00000000 | 0.00000000 | 0.00000000 | 0.00000000 | 0.00000000 | 0.00000000 | 0.00000000 | 0.00000000 | 0.00000000 | 0.00000000 | 0.00000000 | 0.00000000 | 0.00000000 | 0.00000000 | 0.00000000 | 0.00000000 | 0.00000000 | 0.00000000 | 0.00000000 | 0.00000000 | 0.00000000 | 0.00000000 | 0.00000000 | 0.00000000 | 0.00000000 | 0.00000000 | 0.00000000 | 0.00000000 | 0.00000000 | 0.00000000 | 0.00000000 | 0.00000000 | 0.00000000 | 0.00000000 | 0.00000000 | 0.00000000 | 0.00000000 | 0.00000000 | 0.00000000 | 0.00000000 | 0.00000000 | 0.00000000 | 0.00000000 | 0.00000000 | 0.00000000 | 0.00000000 | 0.00000000 | 0.00000000 | 0.00000000 | 0.00000000 | 0.00000000 | 0.00000000 | 0.00000000 | 0.00000000 | 0.00000000 | 0.00000000 | 0.00000000 | 0.00000000 | 0.00000000 | 0.00000000 | 0.00000000 | 0.00000000 | 0.00000000 | 0.00000000 | 0.00000000 | 0.00000000 | 0.00000000 | 0.00000000 | 0.00000000 | 0.00000000 | 0.00000000 | 0.00000000 | 0.00000000 | 0.00000000 | 0.00000000 | 0.00000000 | 0.00000000 | 0.00000000 | 0.00000000 | 0.00000000 | 0.00000000 | 0.00000000 | 0.00000000 | 0.00000000 | 0.00000000 | 0.00000000 | 0.00000000 | 0.00000000 | 0.00000000 | 0.00000000 | 0.00000000 | 0.00000000 | 0.00000000 | 0.00000000 | 0.00000000 | 0.00000000 | 0.00000000 | 0.00000000 | 0.00000000 | 0.00000000 | 0.00000000 | 0.00000000 | 0.00000000 | 0.00000000 | 0.00000000 | 0.00000000 | 0.00000000 | 0.00000000 | 0.00000000 | 0.00000000 | 0.00000000 | 0.00000000 | 0.00000000 | 0.00000000 | 0.00000000 | 0.00000000 | 0.00000000 | 0.00000000 | 0.00000000 | 0.00000000 | 0.00000000 | 0.00000000 | 0.00000000 | 0.00000000 | 0.00000000 | 0.00000000 | 0.00000000 | 0.00000000 | 0.00000000 | 0.00000000 | 0.00000000 | 0.00000000 | 0.00000000 | 0.00000000 | 0.00000000 | 0.00000000 | 0.00000000 | 0.00000000 | 0.00000000 | 0.00000000 | 0.00000000 | 0.00000000 | 0.00000000 | 0.00000000 | 0.00000000 | 0.00000000 | 0.00000000 | 0.00000000 | 0.00000000 | 0.00000000 | 0.00000000 | 0.00000000 | 0.00000000 | 0.00000000 | 0.00000000 | 0.00000000 | 0.00000000 | 0.00000000 | 0.00000000 | 0.00000000 | 0.00000000 | 0.00000000 | 0.00000000 | 0.00000000 | 0.00000000 | 0.00000000 | 0.00000000 | 0.00000000 | 0.00000000 | 0.00000000 | 0.00000000 | 0.00000000 | 0.00000000 | 0.00000000 | 0.00000000 | 0.00000000 | 0.00000000 | 0.00000000 | 0.00000000 | 0.00000000 | 0.00000000 | 0.00000000 | 0.00000000 | 0.00000000 | 0.00000000 | 0.00000000 | 0.00000000 | 0.00000000 | 0.00000000 | 0.00000000 | 0.00000000 | 0.00000000 | 0.00000000 | 0.00000000 | 0.00000000 | 0.00000000 | 0.00000000 | 0.00000000 | 0.00000000 | 0.00000000 | 0.00000000 | 0.00000000 | 0.00000000 | 0.00000000 | 0.00000000 | 0.00000000 | 0.00000000 | 0.00000000 | 0.00000000 | 0.00000000 | 0.00000000 | 0.00000000 | 0.00000000 | 0.00000000 | 0.00000000 | 0.00000000 | 0.00000000 | 0.00000000 | 0.00000000 | 0.00000000 | 0.00000000 | 0.00000000 | 0.00000000 | 0.00000000 | 0.00000000 | 0.00000000 | 0.00000000 | 0.00000000 | 0.00000000 | 0.00000000 | 0.00000000 | 0.00000000 | 0.00000000 | 0.00000000 | 0.00000000 | 0.00000000 | 0.00000000 | 0.00000000 | 0.00000000 | 0.00000000 | 0.00000000 | 0.00000000 | 0.00000000 | 0.00000000 | 0.00000000 | 0.00000000 | 0.00000000 | 0.00000000 | 0.00000000 | 0.00000000 | 0.00000000 | 0.00000000 | 0.00000000 | 0.00000000 | 0.00000000 | 0.00000000 | 0.00000000 | 0.00000000 | 0.00000000 | 0.00000000 | 0.00000000 | 0.00000000 | 0.00000000 | 0.00000000 | 0.00000000 | 0.00000000 | 0.00000000 | 0.00000000 | 0.00000000 | 0.00000000 | 0.00000000 | 0.00000000 | 0.00000000 | 0.00000000 | 0.00000000 | 0.00000000 | 0.00000000 | 0.00000000 | 0.00000000 | 0.00000000 | 0.00000000 | 0.00000000 | 0.00000000 | 0.00000000 | 0.00000000 | 0.00000000 | 0.00000000 | 0.00000000 | 0.00000000 | 0.00000000 | 0.00000000 | 0.00000000 | 0.00000000 | 0.00000000 | 0.00000000 | 0.00000000 | 0.00000000 | 0.00000000 | 0.00000000 | 0.00000000 | 0.00000000 | 0.00000000 | 0.00000000 | 0.00000000 | 0.00000000 | 0.00000000 | 0.00000000 | 0.00000000 | 0.00000000 | 0.00000000 | 0.00000000 | 0.00000000 | 0.00000000 | 0.00000000 | 0.00000000 | 0.00000000 | 0.00000000 | 0.00000000 | 0.00000000 | 0.00000000 | 0.00000000 | 0.00000000 | 0.00000000 | 0.00000000 | 0.00000000 | 0.00000000 | 0.00000000 | 0.00000000 | 0.00000000 | 0.00000000 | 0.00000000 | 0.00000000 | 0.00000000 | 0.00000000 | 0.00000000 | 0.00000000 | 0.00000000 | 0.00000000 | 0.00000000 | 0.00000000 | 0.00000000 | 0.00000000 | 0.00000000 | 0.00000000 | 0.00000000 | 0.00000000 | 0.00000000 | 0.00000000 | 0.00000000 | 0.00000000 | 0.00000000 | 0.00000000 | 0.00000000 | 0.00000000 | 0.00000000 | 0.00000000 | 0.00000000 | 0.00000000 | 0.00000000 | 0.00000000 | 0.00000000 | 0.00000000 | 0.00000000 | 0.00000000 | 0.00000000 | 0.00000000 | 0.00000000 | 0.00000000 | 0.00000000 | 0.00000000 | 0.00000000 | 0.00000000 | 0.00000000 | 0.00000000 | 0.00000000 | 0.00000000 | 0.00000000 | 0.00000000 | 0.00000000 | 0.00000000 | 0.00000000 | 0.00000000 | 0.00000000 | 0.00000000 | 0.00000000 | 0.00000000 | 0.00000000 | 0.00000000 | 0.00000000 | 0.00000000 | 0.00000000 | 0.00000000 | 0.00000000 | 0.00000000 | 0.00000000 | 0.00000000 | 0.00000000 | 0.00000000 | 0.00000000 | 0.00000000 | 0.00000000 | 0.00000000 | 0.00000000 | 0.00000000 | 0.00000000 | 0.00000000 | 0.00000000 | 0.00000000 | 0.00000000 | 0.00000000 | 0.00000000 | 0.00000000 | 0.00000000 | 0.00000000 | 0.00000000 | 0.00000000 | 0.00000000 | 0.00000000 | 0.00000000 | 0.00000000 | 0.00000000 | 0.00000000 | 0.00000000 | 0.00000000 | 0.00000000 | 0.00000000 | 0.00000000 | 0.00000000 | 0.00000000 | 0.00000000 | 0.00000000 | 0.00000000 | 0.00000000 | 0.00000000 | 0.00000000 | 0.00000000 | 0.00000000 | 0.00000000 | 0.00000000 | 0.00000000 | 0.00000000 | 0.00000000 | 0.00000000 | 0.00000000 | 0.00000000 | 0.00000000 | 0.00000000 | 0.00000000 | 0.00000000 | 0.00000000 | 0.00000000 | 0.00000000 | 0.00000000 | 0.00000000 | 0.00000000 | 0.00000000 | 0.00000000 | 0.00000000 | 0.00000000 | 0.00000000 | 0.00000000 | 0.00000000 | 0 |

|   | A          |            |            |            | B          |            |            |            | C          |            |            |            | D          |            |            |            | E          |            |            |            | F          |            |            |            | G          |            |            |            | H          |            |            |            | I          |            |            |            | J          |            |            |            | K          |            |            |            | L          |            |            |            | M          |            |            |            | N          |            |            |            | O          |            |            |            | P          |            |            |            | Q          |            |            |            | R          |            |            |            | S          |            |            |            | T          |            |            |            | U          |            |            |            | V          |            |            |            | W          |            |            |            | X          |            |            |            | Y          |            |            |            | Z          |            |            |            | AA         |            |            |            | AB         |            |            |            | AC         |            |            |            | AD         |            |            |            | AE         |            |            |            | AF         |            |            |            | AG         |            |            |            | AH         |            |            |            | AI         |            |            |            | AJ         |            |            |            | AK         |            |            |            | AL         |            |            |            | AM         |            |            |            | AN         |            |            |            | AO         |            |            |            | AP         |            |            |            | AQ         |            |            |            | AR         |            |            |            | AS         |            |            |            | AT         |            |            |            | AU         |            |            |            | AV         |            |            |            | AW         |            |            |            | AX         |            |            |            | AY         |            |            |            | AZ         |            |            |            | BA         |            |            |            | BB         |            |            |            | BC         |            |            |            | BD         |            |            |            | BE         |            |            |            | BF         |            |            |            | BG         |            |            |            | BH         |            |            |            | BI         |            |            |            | BJ         |            |            |            | BK         |            |            |            | BL         |            |            |            | BM         |            |            |            | BN         |            |            |            | BO         |            |            |            | BP         |            |            |            | BQ         |            |            |            | BR         |            |            |            | BS         |            |            |            | BT         |            |            |            | BU         |            |            |            | BV         |            |            |            | BW         |            |            |            | BX         |            |            |            | BY         |            |            |            | BZ         |            |            |            | CA         |            |            |            | CB         |            |            |            | CC         |            |            |            | CD         |            |            |            | CE         |            |            |            | CF         |            |            |            | CG         |            |            |            | CH         |            |            |            | CI         |            |            |            | CJ         |            |            |            | CK         |            |            |            | CL         |            |            |            | CM         |            |            |            | CN         |            |            |            | CO         |            |            |            | CP         |            |            |            | CQ         |            |            |            | CR         |            |            |            | CS         |            |            |            | CT         |            |            |            | CU         |            |            |            | CV         |            |            |            | CW         |            |            |            | CX         |            |            |            |            |            |            |            |            |            |            |            |            |            |            |            |            |            |            |            |            |            |            |            |            |            |            |            |            |            |            |            |            |            |            |            |            |            |            |            |            |            |            |            |            |            |            |            |            |            |            |            |            |            |            |            |            |            |            |            |            |            |            |            |            |            |            |            |            |            |            |            |            |            |            |            |            |            |            |            |            |            |            |            |            |            |            |            |            |            |            |            |            |            |            |            |            |            |            |            |            |            |            |            |            |            |            |            |            |            |            |            |            |            |            |            |            |            |            |   |
|---|------------|------------|------------|------------|------------|------------|------------|------------|------------|------------|------------|------------|------------|------------|------------|------------|------------|------------|------------|------------|------------|------------|------------|------------|------------|------------|------------|------------|------------|------------|------------|------------|------------|------------|------------|------------|------------|------------|------------|------------|------------|------------|------------|------------|------------|------------|------------|------------|------------|------------|------------|------------|------------|------------|------------|------------|------------|------------|------------|------------|------------|------------|------------|------------|------------|------------|------------|------------|------------|------------|------------|------------|------------|------------|------------|------------|------------|------------|------------|------------|------------|------------|------------|------------|------------|------------|------------|------------|------------|------------|------------|------------|------------|------------|------------|------------|------------|------------|------------|------------|------------|------------|------------|------------|------------|------------|------------|------------|------------|------------|------------|------------|------------|------------|------------|------------|------------|------------|------------|------------|------------|------------|------------|------------|------------|------------|------------|------------|------------|------------|------------|------------|------------|------------|------------|------------|------------|------------|------------|------------|------------|------------|------------|------------|------------|------------|------------|------------|------------|------------|------------|------------|------------|------------|------------|------------|------------|------------|------------|------------|------------|------------|------------|------------|------------|------------|------------|------------|------------|------------|------------|------------|------------|------------|------------|------------|------------|------------|------------|------------|------------|------------|------------|------------|------------|------------|------------|------------|------------|------------|------------|------------|------------|------------|------------|------------|------------|------------|------------|------------|------------|------------|------------|------------|------------|------------|------------|------------|------------|------------|------------|------------|------------|------------|------------|------------|------------|------------|------------|------------|------------|------------|------------|------------|------------|------------|------------|------------|------------|------------|------------|------------|------------|------------|------------|------------|------------|------------|------------|------------|------------|------------|------------|------------|------------|------------|------------|------------|------------|------------|------------|------------|------------|------------|------------|------------|------------|------------|------------|------------|------------|------------|------------|------------|------------|------------|------------|------------|------------|------------|------------|------------|------------|------------|------------|------------|------------|------------|------------|------------|------------|------------|------------|------------|------------|------------|------------|------------|------------|------------|------------|------------|------------|------------|------------|------------|------------|------------|------------|------------|------------|------------|------------|------------|------------|------------|------------|------------|------------|------------|------------|------------|------------|------------|------------|------------|------------|------------|------------|------------|------------|------------|------------|------------|------------|------------|------------|------------|------------|------------|------------|------------|------------|------------|------------|------------|------------|------------|------------|------------|------------|------------|------------|------------|------------|------------|------------|------------|------------|------------|------------|------------|------------|------------|------------|------------|------------|------------|------------|------------|------------|------------|------------|------------|------------|------------|------------|------------|------------|------------|------------|------------|------------|------------|------------|------------|------------|------------|------------|------------|------------|------------|------------|------------|------------|------------|------------|------------|------------|------------|------------|------------|------------|------------|------------|------------|------------|------------|------------|------------|------------|------------|------------|------------|------------|------------|------------|------------|------------|------------|------------|------------|------------|------------|------------|------------|------------|------------|------------|------------|------------|------------|------------|------------|------------|------------|------------|------------|------------|------------|------------|------------|------------|------------|------------|------------|------------|------------|------------|------------|------------|------------|------------|------------|------------|------------|------------|------------|------------|------------|------------|------------|------------|------------|------------|------------|------------|------------|------------|------------|------------|------------|------------|------------|------------|------------|------------|------------|------------|------------|------------|------------|------------|------------|------------|------------|------------|------------|------------|------------|------------|------------|------------|------------|------------|------------|------------|------------|------------|------------|------------|------------|------------|------------|------------|------------|------------|------------|------------|------------|------------|------------|------------|------------|------------|------------|------------|------------|------------|------------|------------|------------|------------|------------|------------|------------|------------|------------|------------|------------|------------|------------|------------|---|
| A | 0.00000000 | 0.00000000 | 0.00000000 | 0.00000000 | 0.00000000 | 0.00000000 | 0.00000000 | 0.00000000 | 0.00000000 | 0.00000000 | 0.00000000 | 0.00000000 | 0.00000000 | 0.00000000 | 0.00000000 | 0.00000000 | 0.00000000 | 0.00000000 | 0.00000000 | 0.00000000 | 0.00000000 | 0.00000000 | 0.00000000 | 0.00000000 | 0.00000000 | 0.00000000 | 0.00000000 | 0.00000000 | 0.00000000 | 0.00000000 | 0.00000000 | 0.00000000 | 0.00000000 | 0.00000000 | 0.00000000 | 0.00000000 | 0.00000000 | 0.00000000 | 0.00000000 | 0.00000000 | 0.00000000 | 0.00000000 | 0.00000000 | 0.00000000 | 0.00000000 | 0.00000000 | 0.00000000 | 0.00000000 | 0.00000000 | 0.00000000 | 0.00000000 | 0.00000000 | 0.00000000 | 0.00000000 | 0.00000000 | 0.00000000 | 0.00000000 | 0.00000000 | 0.00000000 | 0.00000000 | 0.00000000 | 0.00000000 | 0.00000000 | 0.00000000 | 0.00000000 | 0.00000000 | 0.00000000 | 0.00000000 | 0.00000000 | 0.00000000 | 0.00000000 | 0.00000000 | 0.00000000 | 0.00000000 | 0.00000000 | 0.00000000 | 0.00000000 | 0.00000000 | 0.00000000 | 0.00000000 | 0.00000000 | 0.00000000 | 0.00000000 | 0.00000000 | 0.00000000 | 0.00000000 | 0.00000000 | 0.00000000 | 0.00000000 | 0.00000000 | 0.00000000 | 0.00000000 | 0.00000000 | 0.00000000 | 0.00000000 | 0.00000000 | 0.00000000 | 0.00000000 | 0.00000000 | 0.00000000 | 0.00000000 | 0.00000000 | 0.00000000 | 0.00000000 | 0.00000000 | 0.00000000 | 0.00000000 | 0.00000000 | 0.00000000 | 0.00000000 | 0.00000000 | 0.00000000 | 0.00000000 | 0.00000000 | 0.00000000 | 0.00000000 | 0.00000000 | 0.00000000 | 0.00000000 | 0.00000000 | 0.00000000 | 0.00000000 | 0.00000000 | 0.00000000 | 0.00000000 | 0.00000000 | 0.00000000 | 0.00000000 | 0.00000000 | 0.00000000 | 0.00000000 | 0.00000000 | 0.00000000 | 0.00000000 | 0.00000000 | 0.00000000 | 0.00000000 | 0.00000000 | 0.00000000 | 0.00000000 | 0.00000000 | 0.00000000 | 0.00000000 | 0.00000000 | 0.00000000 | 0.00000000 | 0.00000000 | 0.00000000 | 0.00000000 | 0.00000000 | 0.00000000 | 0.00000000 | 0.00000000 | 0.00000000 | 0.00000000 | 0.00000000 | 0.00000000 | 0.00000000 | 0.00000000 | 0.00000000 | 0.00000000 | 0.00000000 | 0.00000000 | 0.00000000 | 0.00000000 | 0.00000000 | 0.00000000 | 0.00000000 | 0.00000000 | 0.00000000 | 0.00000000 | 0.00000000 | 0.00000000 | 0.00000000 | 0.00000000 | 0.00000000 | 0.00000000 | 0.00000000 | 0.00000000 | 0.00000000 | 0.00000000 | 0.00000000 | 0.00000000 | 0.00000000 | 0.00000000 | 0.00000000 | 0.00000000 | 0.00000000 | 0.00000000 | 0.00000000 | 0.00000000 | 0.00000000 | 0.00000000 | 0.00000000 | 0.00000000 | 0.00000000 | 0.00000000 | 0.00000000 | 0.00000000 | 0.00000000 | 0.00000000 | 0.00000000 | 0.00000000 | 0.00000000 | 0.00000000 | 0.00000000 | 0.00000000 | 0.00000000 | 0.00000000 | 0.00000000 | 0.00000000 | 0.00000000 | 0.00000000 | 0.00000000 | 0.00000000 | 0.00000000 | 0.00000000 | 0.00000000 | 0.00000000 | 0.00000000 | 0.00000000 | 0.00000000 | 0.00000000 | 0.00000000 | 0.00000000 | 0.00000000 | 0.00000000 | 0.00000000 | 0.00000000 | 0.00000000 | 0.00000000 | 0.00000000 | 0.00000000 | 0.00000000 | 0.00000000 | 0.00000000 | 0.00000000 | 0.00000000 | 0.00000000 | 0.00000000 | 0.00000000 | 0.00000000 | 0.00000000 | 0.00000000 | 0.00000000 | 0.00000000 | 0.00000000 | 0.00000000 | 0.00000000 | 0.00000000 | 0.00000000 | 0.00000000 | 0.00000000 | 0.00000000 | 0.00000000 | 0.00000000 | 0.00000000 | 0.00000000 | 0.00000000 | 0.00000000 | 0.00000000 | 0.00000000 | 0.00000000 | 0.00000000 | 0.00000000 | 0.00000000 | 0.00000000 | 0.00000000 | 0.00000000 | 0.00000000 | 0.00000000 | 0.00000000 | 0.00000000 | 0.00000000 | 0.00000000 | 0.00000000 | 0.00000000 | 0.00000000 | 0.00000000 | 0.00000000 | 0.00000000 | 0.00000000 | 0.00000000 | 0.00000000 | 0.00000000 | 0.00000000 | 0.00000000 | 0.00000000 | 0.00000000 | 0.00000000 | 0.00000000 | 0.00000000 | 0.00000000 | 0.00000000 | 0.00000000 | 0.00000000 | 0.00000000 | 0.00000000 | 0.00000000 | 0.00000000 | 0.00000000 | 0.00000000 | 0.00000000 | 0.00000000 | 0.00000000 | 0.00000000 | 0.00000000 | 0.00000000 | 0.00000000 | 0.00000000 | 0.00000000 | 0.00000000 | 0.00000000 | 0.00000000 | 0.00000000 | 0.00000000 | 0.00000000 | 0.00000000 | 0.00000000 | 0.00000000 | 0.00000000 | 0.00000000 | 0.00000000 | 0.00000000 | 0.00000000 | 0.00000000 | 0.00000000 | 0.00000000 | 0.00000000 | 0.00000000 | 0.00000000 | 0.00000000 | 0.00000000 | 0.00000000 | 0.00000000 | 0.00000000 | 0.00000000 | 0.00000000 | 0.00000000 | 0.00000000 | 0.00000000 | 0.00000000 | 0.00000000 | 0.00000000 | 0.00000000 | 0.00000000 | 0.00000000 | 0.00000000 | 0.00000000 | 0.00000000 | 0.00000000 | 0.00000000 | 0.00000000 | 0.00000000 | 0.00000000 | 0.00000000 | 0.00000000 | 0.00000000 | 0.00000000 | 0.00000000 | 0.00000000 | 0.00000000 | 0.00000000 | 0.00000000 | 0.00000000 | 0.00000000 | 0.00000000 | 0.00000000 | 0.00000000 | 0.00000000 | 0.00000000 | 0.00000000 | 0.00000000 | 0.00000000 | 0.00000000 | 0.00000000 | 0.00000000 | 0.00000000 | 0.00000000 | 0.00000000 | 0.00000000 | 0.00000000 | 0.00000000 | 0.00000000 | 0.00000000 | 0.00000000 | 0.00000000 | 0.00000000 | 0.00000000 | 0.00000000 | 0.00000000 | 0.00000000 | 0.00000000 | 0.00000000 | 0.00000000 | 0.00000000 | 0.00000000 | 0.00000000 | 0.00000000 | 0.00000000 | 0.00000000 | 0.00000000 | 0.00000000 | 0.00000000 | 0.00000000 | 0.00000000 | 0.00000000 | 0.00000000 | 0.00000000 | 0.00000000 | 0.00000000 | 0.00000000 | 0.00000000 | 0.00000000 | 0.00000000 | 0.00000000 | 0.00000000 | 0.00000000 | 0.00000000 | 0.00000000 | 0.00000000 | 0.00000000 | 0.00000000 | 0.00000000 | 0.00000000 | 0.00000000 | 0.00000000 | 0.00000000 | 0.00000000 | 0.00000000 | 0.00000000 | 0.00000000 | 0.00000000 | 0.00000000 | 0.00000000 | 0.00000000 | 0.00000000 | 0.00000000 | 0.00000000 | 0.00000000 | 0.00000000 | 0.00000000 | 0.00000000 | 0.00000000 | 0.00000000 | 0.00000000 | 0.00000000 | 0.00000000 | 0.00000000 | 0.00000000 | 0.00000000 | 0.00000000 | 0.00000000 | 0.00000000 | 0.00000000 | 0.00000000 | 0.00000000 | 0.00000000 | 0.00000000 | 0.00000000 | 0.00000000 | 0.00000000 | 0.00000000 | 0.00000000 | 0.00000000 | 0.00000000 | 0.00000000 | 0.00000000 | 0.00000000 | 0.00000000 | 0.00000000 | 0.00000000 | 0.00000000 | 0.00000000 | 0.00000000 | 0.00000000 | 0.00000000 | 0.00000000 | 0.00000000 | 0.00000000 | 0.00000000 | 0.00000000 | 0.00000000 | 0.00000000 | 0.00000000 | 0.00000000 | 0.00000000 | 0.00000000 | 0.00000000 | 0.00000000 | 0.00000000 | 0.00000000 | 0.00000000 | 0.00000000 | 0.00000000 | 0.00000000 | 0.00000000 | 0.00000000 | 0.00000000 | 0.00000000 | 0.00000000 | 0.00000000 | 0.00000000 | 0.00000000 | 0.00000000 | 0.00000000 | 0.00000000 | 0.00000000 | 0.00000000 | 0.00000000 | 0.00000000 | 0.00000000 | 0.00000000 | 0.00000000 | 0.00000000 | 0.00000000 | 0.00000000 | 0.00000000 | 0.00000000 | 0.00000000 | 0.00000000 | 0.00000000 | 0.00000000 | 0 |

[illegible]

[illegible]

[illegible]

[illegible]

[illegible]

[illegible]

| Transit | A          | B          | C          | D          | E          | F          | G          | H          | I          | J          | K          | L          | M          | N          | O          | P          | Q          | R          | S          | T          | U          | V |
|---------|------------|------------|------------|------------|------------|------------|------------|------------|------------|------------|------------|------------|------------|------------|------------|------------|------------|------------|------------|------------|------------|---|
| A       |            |            |            |            |            |            |            |            |            |            |            |            |            |            |            |            |            |            |            |            |            |   |
| B       | 0.0021120  |            |            |            |            |            |            |            |            |            |            |            |            |            |            |            |            |            |            |            |            |   |
| C       | 0.0014637  | 0.00196426 |            |            |            |            |            |            |            |            |            |            |            |            |            |            |            |            |            |            |            |   |
| D       | 0.00176621 | 0.00173921 | 0.00196426 |            |            |            |            |            |            |            |            |            |            |            |            |            |            |            |            |            |            |   |
| E       | 0.00205923 | 0.00171829 | 0.00173921 | 0.00196426 |            |            |            |            |            |            |            |            |            |            |            |            |            |            |            |            |            |   |
| F       | 0.00235225 | 0.00166732 | 0.00166732 | 0.00171829 | 0.00196426 |            |            |            |            |            |            |            |            |            |            |            |            |            |            |            |            |   |
| G       | 0.00264527 | 0.00161635 | 0.00161635 | 0.00166732 | 0.00171829 | 0.00196426 |            |            |            |            |            |            |            |            |            |            |            |            |            |            |            |   |
| H       | 0.00293829 | 0.00156538 | 0.00156538 | 0.00161635 | 0.00166732 | 0.00171829 | 0.00196426 |            |            |            |            |            |            |            |            |            |            |            |            |            |            |   |
| I       | 0.00323131 | 0.00151441 | 0.00151441 | 0.00156538 | 0.00161635 | 0.00166732 | 0.00171829 | 0.00196426 |            |            |            |            |            |            |            |            |            |            |            |            |            |   |
| J       | 0.00352433 | 0.00146344 | 0.00146344 | 0.00151441 | 0.00156538 | 0.00161635 | 0.00166732 | 0.00171829 | 0.00196426 |            |            |            |            |            |            |            |            |            |            |            |            |   |
| K       | 0.00381735 | 0.00141247 | 0.00141247 | 0.00146344 | 0.00151441 | 0.00156538 | 0.00161635 | 0.00166732 | 0.00171829 | 0.00196426 |            |            |            |            |            |            |            |            |            |            |            |   |
| L       | 0.00411037 | 0.00136150 | 0.00136150 | 0.00141247 | 0.00146344 | 0.00151441 | 0.00156538 | 0.00161635 | 0.00166732 | 0.00171829 | 0.00196426 |            |            |            |            |            |            |            |            |            |            |   |
| M       | 0.00440339 | 0.00131053 | 0.00131053 | 0.00136150 | 0.00141247 | 0.00146344 | 0.00151441 | 0.00156538 | 0.00161635 | 0.00166732 | 0.00171829 | 0.00196426 |            |            |            |            |            |            |            |            |            |   |
| N       | 0.00469641 | 0.00125956 | 0.00125956 | 0.00131053 | 0.00136150 | 0.00141247 | 0.00146344 | 0.00151441 | 0.00156538 | 0.00161635 | 0.00166732 | 0.00171829 | 0.00196426 |            |            |            |            |            |            |            |            |   |
| O       | 0.00498943 | 0.00120859 | 0.00120859 | 0.00125956 | 0.00131053 | 0.00136150 | 0.00141247 | 0.00146344 | 0.00151441 | 0.00156538 | 0.00161635 | 0.00166732 | 0.00171829 | 0.00196426 |            |            |            |            |            |            |            |   |
| P       | 0.00528245 | 0.00115762 | 0.00115762 | 0.00120859 | 0.00125956 | 0.00131053 | 0.00136150 | 0.00141247 | 0.00146344 | 0.00151441 | 0.00156538 | 0.00161635 | 0.00166732 | 0.00171829 | 0.00196426 |            |            |            |            |            |            |   |
| Q       | 0.00557547 | 0.00110665 | 0.00110665 | 0.00115762 | 0.00120859 | 0.00125956 | 0.00131053 | 0.00136150 | 0.00141247 | 0.00146344 | 0.00151441 | 0.00156538 | 0.00161635 | 0.00166732 | 0.00171829 | 0.00196426 |            |            |            |            |            |   |
| R       | 0.00586849 | 0.00105568 | 0.00105568 | 0.00110665 | 0.00115762 | 0.00120859 | 0.00125956 | 0.00131053 | 0.00136150 | 0.00141247 | 0.00146344 | 0.00151441 | 0.00156538 | 0.00161635 | 0.00166732 | 0.00171829 | 0.00196426 |            |            |            |            |   |
| S       | 0.00616151 | 0.00100471 | 0.00100471 | 0.00105568 | 0.00110665 | 0.00115762 | 0.00120859 | 0.00125956 | 0.00131053 | 0.00136150 | 0.00141247 | 0.00146344 | 0.00151441 | 0.00156538 | 0.00161635 | 0.00166732 | 0.00171829 | 0.00196426 |            |            |            |   |
| T       | 0.00645453 | 0.00095374 | 0.00095374 | 0.00100471 | 0.00105568 | 0.00110665 | 0.00115762 | 0.00120859 | 0.00125956 | 0.00131053 | 0.00136150 | 0.00141247 | 0.00146344 | 0.00151441 | 0.00156538 | 0.00161635 | 0.00166732 | 0.00171829 | 0.00196426 |            |            |   |
| U       | 0.00674755 | 0.00090277 | 0.00090277 | 0.00095374 | 0.00100471 | 0.00105568 | 0.00110665 | 0.00115762 | 0.00120859 | 0.00125956 | 0.00131053 | 0.00136150 | 0.00141247 | 0.00146344 | 0.00151441 | 0.00156538 | 0.00161635 | 0.00166732 | 0.00171829 | 0.00196426 |            |   |
| V       | 0.00704057 | 0.00085180 | 0.00085180 | 0.00090277 | 0.00095374 | 0.00100471 | 0.00105568 | 0.00110665 | 0.00115762 | 0.00120859 | 0.00125956 | 0.00131053 | 0.00136150 | 0.00141247 | 0.00146344 | 0.00151441 | 0.00156538 | 0.00161635 | 0.00166732 | 0.00171829 | 0.00196426 |   |

[illegible]

|   | H1         |            | H2         |            | H3         |            | H4         |            | H5         |            | H6         |            | H7         |            | H8         |            | H9         |            | H10        |            | H11        |            | H12        |            | H13        |            | H14        |            | H15        |            | H16        |            | H17        |            | H18        |            | H19        |            | H20        |            | H21        |            | H22        |            | H23        |            | H24        |            | H25        |            | H26        |            | H27        |            | H28        |            | H29        |            | H30        |            | H31        |            | H32        |            | H33        |            | H34        |            | H35        |            | H36        |            | H37        |            | H38        |            | H39        |            | H40        |            | H41        |            | H42        |            | H43        |            | H44        |            | H45        |            | H46        |            | H47        |            | H48        |            | H49        |            | H50        |            | H51        |            | H52        |            | H53        |            | H54        |            | H55        |            | H56        |            | H57        |            | H58        |            | H59        |            | H60        |            | H61        |            | H62        |            | H63        |            | H64        |            | H65        |            | H66        |            | H67        |            | H68        |            | H69        |            | H70        |            | H71        |            | H72        |            | H73        |            | H74        |            | H75        |            | H76        |            | H77        |            | H78        |            | H79        |            | H80        |            | H81        |            | H82        |            | H83        |            | H84        |            | H85        |            | H86        |            | H87        |            | H88        |            | H89        |            | H90        |            | H91        |            | H92        |            | H93        |            | H94        |            | H95        |            | H96        |            | H97        |            | H98        |            | H99        |            | H100       |            | H101       |            | H102       |            | H103       |            | H104       |            | H105       |            | H106       |            | H107       |            | H108       |            | H109       |            | H110       |            | H111       |            | H112       |            | H113       |            | H114       |            | H115       |            | H116       |            | H117       |            | H118       |            | H119       |            | H120       |            | H121       |            | H122       |            | H123       |            | H124       |            | H125       |            | H126       |            | H127       |            | H128       |            | H129       |            | H130       |            | H131       |            | H132       |            | H133       |            | H134       |            | H135       |            | H136       |            | H137       |            | H138       |            | H139       |            | H140       |            | H141       |            | H142       |            | H143       |            | H144       |            | H145       |            | H146       |            | H147       |            | H148       |            | H149       |            | H150       |            | H151       |            | H152       |            | H153       |            | H154       |            | H155       |            | H156       |            | H157       |            | H158       |            | H159       |            | H160       |            | H161       |            | H162       |            | H163       |            | H164       |            | H165       |            | H166       |            | H167       |            | H168       |            | H169       |            | H170       |            | H171       |            | H172       |            | H173       |            | H174       |            | H175       |            | H176       |            | H177       |            | H178       |            | H179       |            | H180       |            | H181       |            | H182       |            | H183       |            | H184       |            | H185       |            | H186       |            | H187       |            | H188       |            | H189       |            | H190       |            | H191       |            | H192       |            | H193       |            | H194       |            | H195 |  | H196 |  | H197 |  | H198 |  | H199 |  | H200 |  |
|---|------------|------------|------------|------------|------------|------------|------------|------------|------------|------------|------------|------------|------------|------------|------------|------------|------------|------------|------------|------------|------------|------------|------------|------------|------------|------------|------------|------------|------------|------------|------------|------------|------------|------------|------------|------------|------------|------------|------------|------------|------------|------------|------------|------------|------------|------------|------------|------------|------------|------------|------------|------------|------------|------------|------------|------------|------------|------------|------------|------------|------------|------------|------------|------------|------------|------------|------------|------------|------------|------------|------------|------------|------------|------------|------------|------------|------------|------------|------------|------------|------------|------------|------------|------------|------------|------------|------------|------------|------------|------------|------------|------------|------------|------------|------------|------------|------------|------------|------------|------------|------------|------------|------------|------------|------------|------------|------------|------------|------------|------------|------------|------------|------------|------------|------------|------------|------------|------------|------------|------------|------------|------------|------------|------------|------------|------------|------------|------------|------------|------------|------------|------------|------------|------------|------------|------------|------------|------------|------------|------------|------------|------------|------------|------------|------------|------------|------------|------------|------------|------------|------------|------------|------------|------------|------------|------------|------------|------------|------------|------------|------------|------------|------------|------------|------------|------------|------------|------------|------------|------------|------------|------------|------------|------------|------------|------------|------------|------------|------------|------------|------------|------------|------------|------------|------------|------------|------------|------------|------------|------------|------------|------------|------------|------------|------------|------------|------------|------------|------------|------------|------------|------------|------------|------------|------------|------------|------------|------------|------------|------------|------------|------------|------------|------------|------------|------------|------------|------------|------------|------------|------------|------------|------------|------------|------------|------------|------------|------------|------------|------------|------------|------------|------------|------------|------------|------------|------------|------------|------------|------------|------------|------------|------------|------------|------------|------------|------------|------------|------------|------------|------------|------------|------------|------------|------------|------------|------------|------------|------------|------------|------------|------------|------------|------------|------------|------------|------------|------------|------------|------------|------------|------------|------------|------------|------------|------------|------------|------------|------------|------------|------------|------------|------------|------------|------------|------------|------------|------------|------------|------------|------------|------------|------------|------------|------------|------------|------------|------------|------------|------------|------------|------------|------------|------------|------------|------------|------------|------------|------------|------------|------------|------------|------------|------------|------------|------------|------------|------------|------------|------------|------------|------------|------------|------------|------------|------------|------------|------------|------------|------------|------------|------------|------------|------------|------------|------------|------------|------------|------------|------------|------------|------------|------------|------------|------------|------------|------------|------------|------------|------------|------------|------------|------------|------------|------------|------------|------------|------------|------------|------------|------------|------------|------------|------------|------------|------------|------------|------------|------------|------------|------------|------------|------------|------------|------------|------------|------------|------------|------------|------------|------------|------------|------------|------------|------------|------------|------------|------------|------|--|------|--|------|--|------|--|------|--|------|--|
| A | 0.00041367 | 0.00070174 | 0.00023223 | 0.00041917 | 0.00040705 | 0.00041917 | 0.00040705 | 0.00041917 | 0.00040705 | 0.00041917 | 0.00040705 | 0.00041917 | 0.00040705 | 0.00041917 | 0.00040705 | 0.00041917 | 0.00040705 | 0.00041917 | 0.00040705 | 0.00041917 | 0.00040705 | 0.00041917 | 0.00040705 | 0.00041917 | 0.00040705 | 0.00041917 | 0.00040705 | 0.00041917 | 0.00040705 | 0.00041917 | 0.00040705 | 0.00041917 | 0.00040705 | 0.00041917 | 0.00040705 | 0.00041917 | 0.00040705 | 0.00041917 | 0.00040705 | 0.00041917 | 0.00040705 | 0.00041917 | 0.00040705 | 0.00041917 | 0.00040705 | 0.00041917 | 0.00040705 | 0.00041917 | 0.00040705 | 0.00041917 | 0.00040705 | 0.00041917 | 0.00040705 | 0.00041917 | 0.00040705 | 0.00041917 | 0.00040705 | 0.00041917 | 0.00040705 | 0.00041917 | 0.00040705 | 0.00041917 | 0.00040705 | 0.00041917 | 0.00040705 | 0.00041917 | 0.00040705 | 0.00041917 | 0.00040705 | 0.00041917 | 0.00040705 | 0.00041917 | 0.00040705 | 0.00041917 | 0.00040705 | 0.00041917 | 0.00040705 | 0.00041917 | 0.00040705 | 0.00041917 | 0.00040705 | 0.00041917 | 0.00040705 | 0.00041917 | 0.00040705 | 0.00041917 | 0.00040705 | 0.00041917 | 0.00040705 | 0.00041917 | 0.00040705 | 0.00041917 | 0.00040705 | 0.00041917 | 0.00040705 | 0.00041917 | 0.00040705 | 0.00041917 | 0.00040705 | 0.00041917 | 0.00040705 | 0.00041917 | 0.00040705 | 0.00041917 | 0.00040705 | 0.00041917 | 0.00040705 | 0.00041917 | 0.00040705 | 0.00041917 | 0.00040705 | 0.00041917 | 0.00040705 | 0.00041917 | 0.00040705 | 0.00041917 | 0.00040705 | 0.00041917 | 0.00040705 | 0.00041917 | 0.00040705 | 0.00041917 | 0.00040705 | 0.00041917 | 0.00040705 | 0.00041917 | 0.00040705 | 0.00041917 | 0.00040705 | 0.00041917 | 0.00040705 | 0.00041917 | 0.00040705 | 0.00041917 | 0.00040705 | 0.00041917 | 0.00040705 | 0.00041917 | 0.00040705 | 0.00041917 | 0.00040705 | 0.00041917 | 0.00040705 | 0.00041917 | 0.00040705 | 0.00041917 | 0.00040705 | 0.00041917 | 0.00040705 | 0.00041917 | 0.00040705 | 0.00041917 | 0.00040705 | 0.00041917 | 0.00040705 | 0.00041917 | 0.00040705 | 0.00041917 | 0.00040705 | 0.00041917 | 0.00040705 | 0.00041917 | 0.00040705 | 0.00041917 | 0.00040705 | 0.00041917 | 0.00040705 | 0.00041917 | 0.00040705 | 0.00041917 | 0.00040705 | 0.00041917 | 0.00040705 | 0.00041917 | 0.00040705 | 0.00041917 | 0.00040705 | 0.00041917 | 0.00040705 | 0.00041917 | 0.00040705 | 0.00041917 | 0.00040705 | 0.00041917 | 0.00040705 | 0.00041917 | 0.00040705 | 0.00041917 | 0.00040705 | 0.00041917 | 0.00040705 | 0.00041917 | 0.00040705 | 0.00041917 | 0.00040705 | 0.00041917 | 0.00040705 | 0.00041917 | 0.00040705 | 0.00041917 | 0.00040705 | 0.00041917 | 0.00040705 | 0.00041917 | 0.00040705 | 0.00041917 | 0.00040705 | 0.00041917 | 0.00040705 | 0.00041917 | 0.00040705 | 0.00041917 | 0.00040705 | 0.00041917 | 0.00040705 | 0.00041917 | 0.00040705 | 0.00041917 | 0.00040705 | 0.00041917 | 0.00040705 | 0.00041917 | 0.00040705 | 0.00041917 | 0.00040705 | 0.00041917 | 0.00040705 | 0.00041917 | 0.00040705 | 0.00041917 | 0.00040705 | 0.00041917 | 0.00040705 | 0.00041917 | 0.00040705 | 0.00041917 | 0.00040705 | 0.00041917 | 0.00040705 | 0.00041917 | 0.00040705 | 0.00041917 | 0.00040705 | 0.00041917 | 0.00040705 | 0.00041917 | 0.00040705 | 0.00041917 | 0.00040705 | 0.00041917 | 0.00040705 | 0.00041917 | 0.00040705 | 0.00041917 | 0.00040705 | 0.00041917 | 0.00040705 | 0.00041917 | 0.00040705 | 0.00041917 | 0.00040705 | 0.00041917 | 0.00040705 | 0.00041917 | 0.00040705 | 0.00041917 | 0.00040705 | 0.00041917 | 0.00040705 | 0.00041917 | 0.00040705 | 0.00041917 | 0.00040705 | 0.00041917 | 0.00040705 | 0.00041917 | 0.00040705 | 0.00041917 | 0.00040705 | 0.00041917 | 0.00040705 | 0.00041917 | 0.00040705 | 0.00041917 | 0.00040705 | 0.00041917 | 0.00040705 | 0.00041917 | 0.00040705 | 0.00041917 | 0.00040705 | 0.00041917 | 0.00040705 | 0.00041917 | 0.00040705 | 0.00041917 | 0.00040705 | 0.00041917 | 0.00040705 | 0.00041917 | 0.00040705 | 0.00041917 | 0.00040705 | 0.00041917 | 0.00040705 | 0.00041917 | 0.00040705 | 0.00041917 | 0.00040705 | 0.00041917 | 0.00040705 | 0.00041917 | 0.00040705 | 0.00041917 | 0.00040705 | 0.00041917 | 0.00040705 | 0.00041917 | 0.00040705 | 0.00041917 | 0.00040705 | 0.00041917 | 0.00040705 | 0.00041917 | 0.00040705 | 0.00041917 | 0.00040705 | 0.00041917 | 0.00040705 | 0.00041917 | 0.00040705 | 0.00041917 | 0.00040705 | 0.00041917 | 0.00040705 | 0.00041917 | 0.00040705 | 0.00041917 | 0.00040705 | 0.00041917 | 0.00040705 | 0.00041917 | 0.00040705 | 0.00041917 | 0.00040705 | 0.00041917 | 0.00040705 | 0.00041917 | 0.00040705 | 0.00041917 | 0.00040705 | 0.00041917 | 0.00040705 | 0.00041917 | 0.00040705 | 0.00041917 | 0.00040705 | 0.00041917 | 0.00040705 | 0.00041917 | 0.00040705 | 0.00041917 | 0.00040705 | 0.00041917 | 0.00040705 | 0.00041917 | 0.00040705 | 0.00041917 | 0.00040705 | 0.00041917 | 0.00040705 | 0.00041917 | 0.00040705 | 0.00041917 | 0.00040705 | 0.00041917 | 0.00040705 | 0.00041917 | 0.00040705 | 0.00041917 | 0.00040705 | 0.00041917 | 0.00040705 | 0.00041917 | 0.00040705 | 0.00041917 | 0.00040705 | 0.00041917 |      |  |      |  |      |  |      |  |      |  |      |  |

|   | H1         |            | H2         |            | H3         |            | H4         |            | H5         |            | H6         |            | H7         |            | H8         |            | H9         |            | H10        |            | H11        |            | H12        |            | H13        |            | H14        |            | H15        |            | H16        |            | H17        |            | H18        |            | H19        |            | H20        |            | H21        |            | H22        |            | H23        |            | H24        |            | H25        |            | H26        |            | H27        |            | H28        |            | H29        |            | H30        |            | H31        |            | H32        |            | H33        |            | H34        |            | H35        |            | H36        |            | H37        |            | H38        |            | H39        |            | H40        |            | H41        |            | H42        |            | H43        |            | H44        |            | H45        |            | H46        |            | H47        |            | H48        |            | H49        |            | H50        |            | H51        |            | H52        |            | H53        |            | H54        |            | H55        |            | H56        |            | H57        |            | H58        |            | H59        |            | H60        |            | H61        |            | H62        |            | H63        |            | H64        |            | H65        |            | H66        |            | H67        |            | H68        |            | H69        |            | H70        |            | H71        |            | H72        |            | H73        |            | H74        |            | H75        |            | H76        |            | H77        |            | H78        |            | H79        |            | H80        |            | H81        |            | H82        |            | H83        |            | H84        |            | H85        |            | H86        |            | H87        |            | H88        |            | H89        |            | H90        |            | H91        |            | H92        |            | H93        |            | H94        |            | H95        |            | H96        |            | H97        |            | H98        |            | H99        |            | H100       |            | H101       |            | H102       |            | H103       |            | H104       |            | H105       |            | H106       |            | H107       |            | H108       |            | H109       |            | H110       |            | H111       |            | H112       |            | H113       |            | H114       |            | H115       |            | H116       |            | H117       |            | H118       |            | H119       |            | H120       |            | H121       |            | H122       |            | H123       |            | H124       |            | H125       |            | H126       |            | H127       |            | H128       |            | H129       |            | H130       |            | H131       |            | H132       |            | H133       |            | H134       |            | H135       |            | H136       |            | H137       |            | H138       |            | H139       |            | H140       |            | H141       |            | H142       |            | H143       |            | H144       |            | H145       |            | H146       |            | H147       |            | H148       |            | H149       |            | H150       |            | H151       |            | H152       |            | H153       |            | H154       |            | H155       |            | H156       |            | H157       |            | H158       |            | H159       |            | H160       |            | H161       |            | H162       |            | H163       |            | H164       |            | H165       |            | H166       |            | H167       |            | H168       |            | H169       |            | H170       |            | H171       |            | H172       |            | H173       |            | H174       |            | H175       |            | H176       |            | H177       |            | H178       |            | H179       |            | H180       |            | H181       |            | H182       |            | H183       |            | H184       |            | H185       |            | H186       |            | H187       |            | H188       |            | H189       |            | H190       |            | H191       |            | H192       |            | H193       |            | H194       |            | H195 |  | H196 |  | H197 |  | H198 |  | H199 |  | H200 |  |
|---|------------|------------|------------|------------|------------|------------|------------|------------|------------|------------|------------|------------|------------|------------|------------|------------|------------|------------|------------|------------|------------|------------|------------|------------|------------|------------|------------|------------|------------|------------|------------|------------|------------|------------|------------|------------|------------|------------|------------|------------|------------|------------|------------|------------|------------|------------|------------|------------|------------|------------|------------|------------|------------|------------|------------|------------|------------|------------|------------|------------|------------|------------|------------|------------|------------|------------|------------|------------|------------|------------|------------|------------|------------|------------|------------|------------|------------|------------|------------|------------|------------|------------|------------|------------|------------|------------|------------|------------|------------|------------|------------|------------|------------|------------|------------|------------|------------|------------|------------|------------|------------|------------|------------|------------|------------|------------|------------|------------|------------|------------|------------|------------|------------|------------|------------|------------|------------|------------|------------|------------|------------|------------|------------|------------|------------|------------|------------|------------|------------|------------|------------|------------|------------|------------|------------|------------|------------|------------|------------|------------|------------|------------|------------|------------|------------|------------|------------|------------|------------|------------|------------|------------|------------|------------|------------|------------|------------|------------|------------|------------|------------|------------|------------|------------|------------|------------|------------|------------|------------|------------|------------|------------|------------|------------|------------|------------|------------|------------|------------|------------|------------|------------|------------|------------|------------|------------|------------|------------|------------|------------|------------|------------|------------|------------|------------|------------|------------|------------|------------|------------|------------|------------|------------|------------|------------|------------|------------|------------|------------|------------|------------|------------|------------|------------|------------|------------|------------|------------|------------|------------|------------|------------|------------|------------|------------|------------|------------|------------|------------|------------|------------|------------|------------|------------|------------|------------|------------|------------|------------|------------|------------|------------|------------|------------|------------|------------|------------|------------|------------|------------|------------|------------|------------|------------|------------|------------|------------|------------|------------|------------|------------|------------|------------|------------|------------|------------|------------|------------|------------|------------|------------|------------|------------|------------|------------|------------|------------|------------|------------|------------|------------|------------|------------|------------|------------|------------|------------|------------|------------|------------|------------|------------|------------|------------|------------|------------|------------|------------|------------|------------|------------|------------|------------|------------|------------|------------|------------|------------|------------|------------|------------|------------|------------|------------|------------|------------|------------|------------|------------|------------|------------|------------|------------|------------|------------|------------|------------|------------|------------|------------|------------|------------|------------|------------|------------|------------|------------|------------|------------|------------|------------|------------|------------|------------|------------|------------|------------|------------|------------|------------|------------|------------|------------|------------|------------|------------|------------|------------|------------|------------|------------|------------|------------|------------|------------|------------|------------|------------|------------|------------|------------|------------|------------|------------|------------|------------|------------|------------|------------|------------|------------|------------|------------|------------|------------|------------|------------|------------|------|--|------|--|------|--|------|--|------|--|------|--|
| A | 0.00041367 | 0.00070174 | 0.00023223 | 0.00041917 | 0.00040705 | 0.00041917 | 0.00040705 | 0.00041917 | 0.00040705 | 0.00041917 | 0.00040705 | 0.00041917 | 0.00040705 | 0.00041917 | 0.00040705 | 0.00041917 | 0.00040705 | 0.00041917 | 0.00040705 | 0.00041917 | 0.00040705 | 0.00041917 | 0.00040705 | 0.00041917 | 0.00040705 | 0.00041917 | 0.00040705 | 0.00041917 | 0.00040705 | 0.00041917 | 0.00040705 | 0.00041917 | 0.00040705 | 0.00041917 | 0.00040705 | 0.00041917 | 0.00040705 | 0.00041917 | 0.00040705 | 0.00041917 | 0.00040705 | 0.00041917 | 0.00040705 | 0.00041917 | 0.00040705 | 0.00041917 | 0.00040705 | 0.00041917 | 0.00040705 | 0.00041917 | 0.00040705 | 0.00041917 | 0.00040705 | 0.00041917 | 0.00040705 | 0.00041917 | 0.00040705 | 0.00041917 | 0.00040705 | 0.00041917 | 0.00040705 | 0.00041917 | 0.00040705 | 0.00041917 | 0.00040705 | 0.00041917 | 0.00040705 | 0.00041917 | 0.00040705 | 0.00041917 | 0.00040705 | 0.00041917 | 0.00040705 | 0.00041917 | 0.00040705 | 0.00041917 | 0.00040705 | 0.00041917 | 0.00040705 | 0.00041917 | 0.00040705 | 0.00041917 | 0.00040705 | 0.00041917 | 0.00040705 | 0.00041917 | 0.00040705 | 0.00041917 | 0.00040705 | 0.00041917 | 0.00040705 | 0.00041917 | 0.00040705 | 0.00041917 | 0.00040705 | 0.00041917 | 0.00040705 | 0.00041917 | 0.00040705 | 0.00041917 | 0.00040705 | 0.00041917 | 0.00040705 | 0.00041917 | 0.00040705 | 0.00041917 | 0.00040705 | 0.00041917 | 0.00040705 | 0.00041917 | 0.00040705 | 0.00041917 | 0.00040705 | 0.00041917 | 0.00040705 | 0.00041917 | 0.00040705 | 0.00041917 | 0.00040705 | 0.00041917 | 0.00040705 | 0.00041917 | 0.00040705 | 0.00041917 | 0.00040705 | 0.00041917 | 0.00040705 | 0.00041917 | 0.00040705 | 0.00041917 | 0.00040705 | 0.00041917 | 0.00040705 | 0.00041917 | 0.00040705 | 0.00041917 | 0.00040705 | 0.00041917 | 0.00040705 | 0.00041917 | 0.00040705 | 0.00041917 | 0.00040705 | 0.00041917 | 0.00040705 | 0.00041917 | 0.00040705 | 0.00041917 | 0.00040705 | 0.00041917 | 0.00040705 | 0.00041917 | 0.00040705 | 0.00041917 | 0.00040705 | 0.00041917 | 0.00040705 | 0.00041917 | 0.00040705 | 0.00041917 | 0.00040705 | 0.00041917 | 0.00040705 | 0.00041917 | 0.00040705 | 0.00041917 | 0.00040705 | 0.00041917 | 0.00040705 | 0.00041917 | 0.00040705 | 0.00041917 | 0.00040705 | 0.00041917 | 0.00040705 | 0.00041917 | 0.00040705 | 0.00041917 | 0.00040705 | 0.00041917 | 0.00040705 | 0.00041917 | 0.00040705 | 0.00041917 | 0.00040705 | 0.00041917 | 0.00040705 | 0.00041917 | 0.00040705 | 0.00041917 | 0.00040705 | 0.00041917 | 0.00040705 | 0.00041917 | 0.00040705 | 0.00041917 | 0.00040705 | 0.00041917 | 0.00040705 | 0.00041917 | 0.00040705 | 0.00041917 | 0.00040705 | 0.00041917 | 0.00040705 | 0.00041917 | 0.00040705 | 0.00041917 | 0.00040705 | 0.00041917 | 0.00040705 | 0.00041917 | 0.00040705 | 0.00041917 | 0.00040705 | 0.00041917 | 0.00040705 | 0.00041917 | 0.00040705 | 0.00041917 | 0.00040705 | 0.00041917 | 0.00040705 | 0.00041917 | 0.00040705 | 0.00041917 | 0.00040705 | 0.00041917 | 0.00040705 | 0.00041917 | 0.00040705 | 0.00041917 | 0.00040705 | 0.00041917 | 0.00040705 | 0.00041917 | 0.00040705 | 0.00041917 | 0.00040705 | 0.00041917 | 0.00040705 | 0.00041917 | 0.00040705 | 0.00041917 | 0.00040705 | 0.00041917 | 0.00040705 | 0.00041917 | 0.00040705 | 0.00041917 | 0.00040705 | 0.00041917 | 0.00040705 | 0.00041917 | 0.00040705 | 0.00041917 | 0.00040705 | 0.00041917 | 0.00040705 | 0.00041917 | 0.00040705 | 0.00041917 | 0.00040705 | 0.00041917 | 0.00040705 | 0.00041917 | 0.00040705 | 0.00041917 | 0.00040705 | 0.00041917 | 0.00040705 | 0.00041917 | 0.00040705 | 0.00041917 | 0.00040705 | 0.00041917 | 0.00040705 | 0.00041917 | 0.00040705 | 0.00041917 | 0.00040705 | 0.00041917 | 0.00040705 | 0.00041917 | 0.00040705 | 0.00041917 | 0.00040705 | 0.00041917 | 0.00040705 | 0.00041917 | 0.00040705 | 0.00041917 | 0.00040705 | 0.00041917 | 0.00040705 | 0.00041917 | 0.00040705 | 0.00041917 | 0.00040705 | 0.00041917 | 0.00040705 | 0.00041917 | 0.00040705 | 0.00041917 | 0.00040705 | 0.00041917 | 0.00040705 | 0.00041917 | 0.00040705 | 0.00041917 | 0.00040705 | 0.00041917 | 0.00040705 | 0.00041917 | 0.00040705 | 0.00041917 | 0.00040705 | 0.00041917 | 0.00040705 | 0.00041917 | 0.00040705 | 0.00041917 | 0.00040705 | 0.00041917 | 0.00040705 | 0.00041917 | 0.00040705 | 0.00041917 | 0.00040705 | 0.00041917 | 0.00040705 | 0.00041917 | 0.00040705 | 0.00041917 | 0.00040705 | 0.00041917 | 0.00040705 | 0.00041917 | 0.00040705 | 0.00041917 | 0.00040705 | 0.00041917 | 0.00040705 | 0.00041917 | 0.00040705 | 0.00041917 | 0.00040705 | 0.00041917 | 0.00040705 | 0.00041917 | 0.00040705 | 0.00041917 | 0.00040705 | 0.00041917 | 0.00040705 | 0.00041917 | 0.00040705 | 0.00041917 | 0.00040705 | 0.00041917 | 0.00040705 | 0.00041917 | 0.00040705 | 0.00041917 | 0.00040705 | 0.00041917 | 0.00040705 | 0.00041917 | 0.00040705 | 0.00041917 | 0.00040705 | 0.00041917 | 0.00040705 | 0.00041917 | 0.00040705 | 0.00041917 | 0.00040705 | 0.00041917 | 0.00040705 | 0.00041917 | 0.00040705 | 0.00041917 | 0.00040705 | 0.00041917 | 0.00040705 | 0.00041917 | 0.00040705 | 0.00041917 |      |  |      |  |      |  |      |  |      |  |      |  |

[illegible]

[illegible]

[illegible]

[illegible]

[illegible]



[illegible]

[illegible]





[illegible]

[illegible]

| Transit | A          | B          | C          | D          | E          | F          | G          | H          | I          | J          | K          | L          | M          | N          | O          | P          | Q          | R          | S          | T          | U          | V |
|---------|------------|------------|------------|------------|------------|------------|------------|------------|------------|------------|------------|------------|------------|------------|------------|------------|------------|------------|------------|------------|------------|---|
| A       |            |            |            |            |            |            |            |            |            |            |            |            |            |            |            |            |            |            |            |            |            |   |
| B       | 0.0021120  |            |            |            |            |            |            |            |            |            |            |            |            |            |            |            |            |            |            |            |            |   |
| C       | 0.0014637  | 0.00196426 |            |            |            |            |            |            |            |            |            |            |            |            |            |            |            |            |            |            |            |   |
| D       | 0.00176621 | 0.00173921 | 0.00196426 |            |            |            |            |            |            |            |            |            |            |            |            |            |            |            |            |            |            |   |
| E       | 0.00205923 | 0.00171829 | 0.00173921 | 0.00196426 |            |            |            |            |            |            |            |            |            |            |            |            |            |            |            |            |            |   |
| F       | 0.00235225 | 0.00166732 | 0.00166732 | 0.00171829 | 0.00196426 |            |            |            |            |            |            |            |            |            |            |            |            |            |            |            |            |   |
| G       | 0.00264527 | 0.00161635 | 0.00161635 | 0.00166732 | 0.00171829 | 0.00196426 |            |            |            |            |            |            |            |            |            |            |            |            |            |            |            |   |
| H       | 0.00293829 | 0.00156538 | 0.00156538 | 0.00161635 | 0.00166732 | 0.00171829 | 0.00196426 |            |            |            |            |            |            |            |            |            |            |            |            |            |            |   |
| I       | 0.00323131 | 0.00151441 | 0.00151441 | 0.00156538 | 0.00161635 | 0.00166732 | 0.00171829 | 0.00196426 |            |            |            |            |            |            |            |            |            |            |            |            |            |   |
| J       | 0.00352433 | 0.00146344 | 0.00146344 | 0.00151441 | 0.00156538 | 0.00161635 | 0.00166732 | 0.00171829 | 0.00196426 |            |            |            |            |            |            |            |            |            |            |            |            |   |
| K       | 0.00381735 | 0.00141247 | 0.00141247 | 0.00146344 | 0.00151441 | 0.00156538 | 0.00161635 | 0.00166732 | 0.00171829 | 0.00196426 |            |            |            |            |            |            |            |            |            |            |            |   |
| L       | 0.00411037 | 0.00136150 | 0.00136150 | 0.00141247 | 0.00146344 | 0.00151441 | 0.00156538 | 0.00161635 | 0.00166732 | 0.00171829 | 0.00196426 |            |            |            |            |            |            |            |            |            |            |   |
| M       | 0.00440339 | 0.00131053 | 0.00131053 | 0.00136150 | 0.00141247 | 0.00146344 | 0.00151441 | 0.00156538 | 0.00161635 | 0.00166732 | 0.00171829 | 0.00196426 |            |            |            |            |            |            |            |            |            |   |
| N       | 0.00469641 | 0.00125956 | 0.00125956 | 0.00131053 | 0.00136150 | 0.00141247 | 0.00146344 | 0.00151441 | 0.00156538 | 0.00161635 | 0.00166732 | 0.00171829 | 0.00196426 |            |            |            |            |            |            |            |            |   |
| O       | 0.00498943 | 0.00120859 | 0.00120859 | 0.00125956 | 0.00131053 | 0.00136150 | 0.00141247 | 0.00146344 | 0.00151441 | 0.00156538 | 0.00161635 | 0.00166732 | 0.00171829 | 0.00196426 |            |            |            |            |            |            |            |   |
| P       | 0.00528245 | 0.00115762 | 0.00115762 | 0.00120859 | 0.00125956 | 0.00131053 | 0.00136150 | 0.00141247 | 0.00146344 | 0.00151441 | 0.00156538 | 0.00161635 | 0.00166732 | 0.00171829 | 0.00196426 |            |            |            |            |            |            |   |
| Q       | 0.00557547 | 0.00110665 | 0.00110665 | 0.00115762 | 0.00120859 | 0.00125956 | 0.00131053 | 0.00136150 | 0.00141247 | 0.00146344 | 0.00151441 | 0.00156538 | 0.00161635 | 0.00166732 | 0.00171829 | 0.00196426 |            |            |            |            |            |   |
| R       | 0.00586849 | 0.00105568 | 0.00105568 | 0.00110665 | 0.00115762 | 0.00120859 | 0.00125956 | 0.00131053 | 0.00136150 | 0.00141247 | 0.00146344 | 0.00151441 | 0.00156538 | 0.00161635 | 0.00166732 | 0.00171829 | 0.00196426 |            |            |            |            |   |
| S       | 0.00616151 | 0.00100471 | 0.00100471 | 0.00105568 | 0.00110665 | 0.00115762 | 0.00120859 | 0.00125956 | 0.00131053 | 0.00136150 | 0.00141247 | 0.00146344 | 0.00151441 | 0.00156538 | 0.00161635 | 0.00166732 | 0.00171829 | 0.00196426 |            |            |            |   |
| T       | 0.00645453 | 0.00095374 | 0.00095374 | 0.00100471 | 0.00105568 | 0.00110665 | 0.00115762 | 0.00120859 | 0.00125956 | 0.00131053 | 0.00136150 | 0.00141247 | 0.00146344 | 0.00151441 | 0.00156538 | 0.00161635 | 0.00166732 | 0.00171829 | 0.00196426 |            |            |   |
| U       | 0.00674755 | 0.00090277 | 0.00090277 | 0.00095374 | 0.00100471 | 0.00105568 | 0.00110665 | 0.00115762 | 0.00120859 | 0.00125956 | 0.00131053 | 0.00136150 | 0.00141247 | 0.00146344 | 0.00151441 | 0.00156538 | 0.00161635 | 0.00166732 | 0.00171829 | 0.00196426 |            |   |
| V       | 0.00704057 | 0.00085180 | 0.00085180 | 0.00090277 | 0.00095374 | 0.00100471 | 0.00105568 | 0.00110665 | 0.00115762 | 0.00120859 | 0.00125956 | 0.00131053 | 0.00136150 | 0.00141247 | 0.00146344 | 0.00151441 | 0.00156538 | 0.00161635 | 0.00166732 | 0.00171829 | 0.00196426 |   |

[illegible]

[illegible]

[illegible]

[illegible]

[illegible]

[illegible]



|   | H1         |           | H2        |           | H3        |           | H4        |           | H5        |           | H6        |           | H7        |           | H8        |           | H9        |           | H10       |           | H11       |           | H12       |           | H13       |           | H14       |           | H15       |           | H16       |           | H17       |           | H18       |           | H19       |           | H20       |           | H21       |           | H22       |           | H23       |           | H24       |           | H25       |           | H26       |           | H27       |           | H28       |           | H29       |           | H30       |           | H31       |           | H32       |           | H33       |           | H34       |           | H35       |           | H36       |           | H37       |           | H38       |           | H39       |           | H40       |           | H41       |           | H42       |           | H43       |           | H44       |           | H45       |           | H46       |           | H47       |           | H48       |           | H49       |           | H50       |           | H51       |           | H52       |           | H53       |           | H54       |           | H55       |           | H56       |           | H57       |           | H58       |           | H59       |           | H60       |           | H61       |           | H62       |           | H63       |           | H64       |           | H65       |           | H66       |           | H67       |           | H68       |           | H69       |           | H70       |           | H71       |           | H72       |           | H73       |           | H74       |           | H75       |           | H76       |           | H77       |           | H78       |           | H79       |           | H80       |           | H81       |           | H82       |           | H83       |           | H84       |           | H85       |           | H86       |           | H87       |           | H88       |           | H89       |           | H90       |           | H91       |           | H92       |           | H93       |           | H94       |           | H95       |           | H96       |           | H97       |           | H98       |           | H99       |           | H100      |           | H101      |           | H102      |           | H103      |           | H104      |           | H105      |           | H106      |           | H107      |           | H108      |           | H109      |           | H110      |           | H111      |           | H112      |           | H113      |           | H114      |           | H115      |           | H116      |           | H117      |           | H118      |           | H119      |           | H120      |           | H121      |           | H122      |           | H123      |           | H124      |           | H125      |           | H126      |           | H127      |           | H128      |           | H129      |           | H130      |           | H131      |           | H132      |           | H133      |           | H134      |           | H135      |           | H136      |           | H137      |           | H138      |           | H139      |           | H140      |           | H141      |           | H142      |           | H143      |           | H144      |           | H145      |           | H146      |           | H147      |           | H148      |           | H149      |           | H150      |           | H151      |           | H152      |           | H153      |           | H154      |           | H155      |           | H156      |           | H157      |           | H158      |           | H159      |           | H160      |           | H161      |           | H162      |           | H163      |           | H164      |           | H165      |           | H166      |           | H167      |           | H168      |           | H169      |           | H170      |           | H171      |           | H172      |           | H173      |           | H174      |           | H175      |           | H176      |           | H177      |           | H178      |           | H179      |           | H180      |           | H181      |           | H182      |           | H183      |           | H184      |           | H185      |           | H186      |           | H187      |           | H188      |           | H189      |           | H190      |           | H191      |           | H192      |           | H193      |           | H194      |           | H195      |           | H196      |           | H197      |           | H198      |           | H199      |           | H200      |           |           |           |           |           |           |           |           |           |           |
|---|------------|-----------|-----------|-----------|-----------|-----------|-----------|-----------|-----------|-----------|-----------|-----------|-----------|-----------|-----------|-----------|-----------|-----------|-----------|-----------|-----------|-----------|-----------|-----------|-----------|-----------|-----------|-----------|-----------|-----------|-----------|-----------|-----------|-----------|-----------|-----------|-----------|-----------|-----------|-----------|-----------|-----------|-----------|-----------|-----------|-----------|-----------|-----------|-----------|-----------|-----------|-----------|-----------|-----------|-----------|-----------|-----------|-----------|-----------|-----------|-----------|-----------|-----------|-----------|-----------|-----------|-----------|-----------|-----------|-----------|-----------|-----------|-----------|-----------|-----------|-----------|-----------|-----------|-----------|-----------|-----------|-----------|-----------|-----------|-----------|-----------|-----------|-----------|-----------|-----------|-----------|-----------|-----------|-----------|-----------|-----------|-----------|-----------|-----------|-----------|-----------|-----------|-----------|-----------|-----------|-----------|-----------|-----------|-----------|-----------|-----------|-----------|-----------|-----------|-----------|-----------|-----------|-----------|-----------|-----------|-----------|-----------|-----------|-----------|-----------|-----------|-----------|-----------|-----------|-----------|-----------|-----------|-----------|-----------|-----------|-----------|-----------|-----------|-----------|-----------|-----------|-----------|-----------|-----------|-----------|-----------|-----------|-----------|-----------|-----------|-----------|-----------|-----------|-----------|-----------|-----------|-----------|-----------|-----------|-----------|-----------|-----------|-----------|-----------|-----------|-----------|-----------|-----------|-----------|-----------|-----------|-----------|-----------|-----------|-----------|-----------|-----------|-----------|-----------|-----------|-----------|-----------|-----------|-----------|-----------|-----------|-----------|-----------|-----------|-----------|-----------|-----------|-----------|-----------|-----------|-----------|-----------|-----------|-----------|-----------|-----------|-----------|-----------|-----------|-----------|-----------|-----------|-----------|-----------|-----------|-----------|-----------|-----------|-----------|-----------|-----------|-----------|-----------|-----------|-----------|-----------|-----------|-----------|-----------|-----------|-----------|-----------|-----------|-----------|-----------|-----------|-----------|-----------|-----------|-----------|-----------|-----------|-----------|-----------|-----------|-----------|-----------|-----------|-----------|-----------|-----------|-----------|-----------|-----------|-----------|-----------|-----------|-----------|-----------|-----------|-----------|-----------|-----------|-----------|-----------|-----------|-----------|-----------|-----------|-----------|-----------|-----------|-----------|-----------|-----------|-----------|-----------|-----------|-----------|-----------|-----------|-----------|-----------|-----------|-----------|-----------|-----------|-----------|-----------|-----------|-----------|-----------|-----------|-----------|-----------|-----------|-----------|-----------|-----------|-----------|-----------|-----------|-----------|-----------|-----------|-----------|-----------|-----------|-----------|-----------|-----------|-----------|-----------|-----------|-----------|-----------|-----------|-----------|-----------|-----------|-----------|-----------|-----------|-----------|-----------|-----------|-----------|-----------|-----------|-----------|-----------|-----------|-----------|-----------|-----------|-----------|-----------|-----------|-----------|-----------|-----------|-----------|-----------|-----------|-----------|-----------|-----------|-----------|-----------|-----------|-----------|-----------|-----------|-----------|-----------|-----------|-----------|-----------|-----------|-----------|-----------|-----------|-----------|-----------|-----------|-----------|-----------|-----------|-----------|-----------|-----------|-----------|-----------|-----------|-----------|-----------|-----------|-----------|-----------|-----------|-----------|-----------|-----------|-----------|-----------|-----------|-----------|-----------|-----------|-----------|-----------|-----------|-----------|-----------|-----------|-----------|-----------|-----------|-----------|-----------|-----------|-----------|-----------|-----------|-----------|-----------|-----------|-----------|-----------|-----------|-----------|-----------|-----------|-----------|
| A | 0.00041367 | 0.0007174 | 0.0002323 | 0.0004197 | 0.0004197 | 0.0004197 | 0.0004197 | 0.0004197 | 0.0004197 | 0.0004197 | 0.0004197 | 0.0004197 | 0.0004197 | 0.0004197 | 0.0004197 | 0.0004197 | 0.0004197 | 0.0004197 | 0.0004197 | 0.0004197 | 0.0004197 | 0.0004197 | 0.0004197 | 0.0004197 | 0.0004197 | 0.0004197 | 0.0004197 | 0.0004197 | 0.0004197 | 0.0004197 | 0.0004197 | 0.0004197 | 0.0004197 | 0.0004197 | 0.0004197 | 0.0004197 | 0.0004197 | 0.0004197 | 0.0004197 | 0.0004197 | 0.0004197 | 0.0004197 | 0.0004197 | 0.0004197 | 0.0004197 | 0.0004197 | 0.0004197 | 0.0004197 | 0.0004197 | 0.0004197 | 0.0004197 | 0.0004197 | 0.0004197 | 0.0004197 | 0.0004197 | 0.0004197 | 0.0004197 | 0.0004197 | 0.0004197 | 0.0004197 | 0.0004197 | 0.0004197 | 0.0004197 | 0.0004197 | 0.0004197 | 0.0004197 | 0.0004197 | 0.0004197 | 0.0004197 | 0.0004197 | 0.0004197 | 0.0004197 | 0.0004197 | 0.0004197 | 0.0004197 | 0.0004197 | 0.0004197 | 0.0004197 | 0.0004197 | 0.0004197 | 0.0004197 | 0.0004197 | 0.0004197 | 0.0004197 | 0.0004197 | 0.0004197 | 0.0004197 | 0.0004197 | 0.0004197 | 0.0004197 | 0.0004197 | 0.0004197 | 0.0004197 | 0.0004197 | 0.0004197 | 0.0004197 | 0.0004197 | 0.0004197 | 0.0004197 | 0.0004197 | 0.0004197 | 0.0004197 | 0.0004197 | 0.0004197 | 0.0004197 | 0.0004197 | 0.0004197 | 0.0004197 | 0.0004197 | 0.0004197 | 0.0004197 | 0.0004197 | 0.0004197 | 0.0004197 | 0.0004197 | 0.0004197 | 0.0004197 | 0.0004197 | 0.0004197 | 0.0004197 | 0.0004197 | 0.0004197 | 0.0004197 | 0.0004197 | 0.0004197 | 0.0004197 | 0.0004197 | 0.0004197 | 0.0004197 | 0.0004197 | 0.0004197 | 0.0004197 | 0.0004197 | 0.0004197 | 0.0004197 | 0.0004197 | 0.0004197 | 0.0004197 | 0.0004197 | 0.0004197 | 0.0004197 | 0.0004197 | 0.0004197 | 0.0004197 | 0.0004197 | 0.0004197 | 0.0004197 | 0.0004197 | 0.0004197 | 0.0004197 | 0.0004197 | 0.0004197 | 0.0004197 | 0.0004197 | 0.0004197 | 0.0004197 | 0.0004197 | 0.0004197 | 0.0004197 | 0.0004197 | 0.0004197 | 0.0004197 | 0.0004197 | 0.0004197 | 0.0004197 | 0.0004197 | 0.0004197 | 0.0004197 | 0.0004197 | 0.0004197 | 0.0004197 | 0.0004197 | 0.0004197 | 0.0004197 | 0.0004197 | 0.0004197 | 0.0004197 | 0.0004197 | 0.0004197 | 0.0004197 | 0.0004197 | 0.0004197 | 0.0004197 | 0.0004197 | 0.0004197 | 0.0004197 | 0.0004197 | 0.0004197 | 0.0004197 | 0.0004197 | 0.0004197 | 0.0004197 | 0.0004197 | 0.0004197 | 0.0004197 | 0.0004197 | 0.0004197 | 0.0004197 | 0.0004197 | 0.0004197 | 0.0004197 | 0.0004197 | 0.0004197 | 0.0004197 | 0.0004197 | 0.0004197 | 0.0004197 | 0.0004197 | 0.0004197 | 0.0004197 | 0.0004197 | 0.0004197 | 0.0004197 | 0.0004197 | 0.0004197 | 0.0004197 | 0.0004197 | 0.0004197 | 0.0004197 | 0.0004197 | 0.0004197 | 0.0004197 | 0.0004197 | 0.0004197 | 0.0004197 | 0.0004197 | 0.0004197 | 0.0004197 | 0.0004197 | 0.0004197 | 0.0004197 | 0.0004197 | 0.0004197 | 0.0004197 | 0.0004197 | 0.0004197 | 0.0004197 | 0.0004197 | 0.0004197 | 0.0004197 | 0.0004197 | 0.0004197 | 0.0004197 | 0.0004197 | 0.0004197 | 0.0004197 | 0.0004197 | 0.0004197 | 0.0004197 | 0.0004197 | 0.0004197 | 0.0004197 | 0.0004197 | 0.0004197 | 0.0004197 | 0.0004197 | 0.0004197 | 0.0004197 | 0.0004197 | 0.0004197 | 0.0004197 | 0.0004197 | 0.0004197 | 0.0004197 | 0.0004197 | 0.0004197 | 0.0004197 | 0.0004197 | 0.0004197 | 0.0004197 | 0.0004197 | 0.0004197 | 0.0004197 | 0.0004197 | 0.0004197 | 0.0004197 | 0.0004197 | 0.0004197 | 0.0004197 | 0.0004197 | 0.0004197 | 0.0004197 | 0.0004197 | 0.0004197 | 0.0004197 | 0.0004197 | 0.0004197 | 0.0004197 | 0.0004197 | 0.0004197 | 0.0004197 | 0.0004197 | 0.0004197 | 0.0004197 | 0.0004197 | 0.0004197 | 0.0004197 | 0.0004197 | 0.0004197 | 0.0004197 | 0.0004197 | 0.0004197 | 0.0004197 | 0.0004197 | 0.0004197 | 0.0004197 | 0.0004197 | 0.0004197 | 0.0004197 | 0.0004197 | 0.0004197 | 0.0004197 | 0.0004197 | 0.0004197 | 0.0004197 | 0.0004197 | 0.0004197 | 0.0004197 | 0.0004197 | 0.0004197 | 0.0004197 | 0.0004197 | 0.0004197 | 0.0004197 | 0.0004197 | 0.0004197 | 0.0004197 | 0.0004197 | 0.0004197 | 0.0004197 | 0.0004197 | 0.0004197 | 0.0004197 | 0.0004197 | 0.0004197 | 0.0004197 | 0.0004197 | 0.0004197 | 0.0004197 | 0.0004197 | 0.0004197 | 0.0004197 | 0.0004197 | 0.0004197 | 0.0004197 | 0.0004197 | 0.0004197 | 0.0004197 | 0.0004197 | 0.0004197 | 0.0004197 | 0.0004197 | 0.0004197 | 0.0004197 | 0.0004197 | 0.0004197 | 0.0004197 | 0.0004197 | 0.0004197 | 0.0004197 | 0.0004197 | 0.0004197 | 0.0004197 | 0.0004197 | 0.0004197 | 0.0004197 | 0.0004197 | 0.0004197 | 0.0004197 | 0.0004197 | 0.0004197 | 0.0004197 | 0.0004197 | 0.0004197 | 0.0004197 | 0.0004197 | 0.0004197 | 0.0004197 | 0.0004197 | 0.0004197 | 0.0004197 | 0.0004197 | 0.0004197 | 0.0004197 | 0.0004197 | 0.0004197 | 0.0004197 | 0.0004197 | 0.0004197 | 0.0004197 | 0.0004197 | 0.0004197 | 0.0004197 | 0.0004197 | 0.0004197 | 0.0004197 | 0.0004197 | 0.0004197 | 0.0004197 | 0.0004197 | 0.0004197 | 0.0004197 | 0.0004197 | 0.0004197 | 0.0004197 | 0.0004197 | 0.0004197 | 0.0004197 | 0.0004197 |

[illegible]

[illegible]

[illegible]

[illegible]

| Transit | A          | B          | C          | D          | E          | F          | G          | H          | I          | J          | K          | L          | M          | N          | O          | P          | Q          | R          | S          | T          | U          | V |
|---------|------------|------------|------------|------------|------------|------------|------------|------------|------------|------------|------------|------------|------------|------------|------------|------------|------------|------------|------------|------------|------------|---|
| A       |            |            |            |            |            |            |            |            |            |            |            |            |            |            |            |            |            |            |            |            |            |   |
| B       | 0.0021120  |            |            |            |            |            |            |            |            |            |            |            |            |            |            |            |            |            |            |            |            |   |
| C       | 0.0014637  | 0.00196426 |            |            |            |            |            |            |            |            |            |            |            |            |            |            |            |            |            |            |            |   |
| D       | 0.00176621 | 0.00173921 | 0.00196426 |            |            |            |            |            |            |            |            |            |            |            |            |            |            |            |            |            |            |   |
| E       | 0.00205923 | 0.00171829 | 0.00173921 | 0.00196426 |            |            |            |            |            |            |            |            |            |            |            |            |            |            |            |            |            |   |
| F       | 0.00235225 | 0.00166732 | 0.00166732 | 0.00171829 | 0.00196426 |            |            |            |            |            |            |            |            |            |            |            |            |            |            |            |            |   |
| G       | 0.00264527 | 0.00161635 | 0.00161635 | 0.00166732 | 0.00171829 | 0.00196426 |            |            |            |            |            |            |            |            |            |            |            |            |            |            |            |   |
| H       | 0.00293829 | 0.00156538 | 0.00156538 | 0.00161635 | 0.00166732 | 0.00171829 | 0.00196426 |            |            |            |            |            |            |            |            |            |            |            |            |            |            |   |
| I       | 0.00323131 | 0.00151441 | 0.00151441 | 0.00156538 | 0.00161635 | 0.00166732 | 0.00171829 | 0.00196426 |            |            |            |            |            |            |            |            |            |            |            |            |            |   |
| J       | 0.00352433 | 0.00146344 | 0.00146344 | 0.00151441 | 0.00156538 | 0.00161635 | 0.00166732 | 0.00171829 | 0.00196426 |            |            |            |            |            |            |            |            |            |            |            |            |   |
| K       | 0.00381735 | 0.00141247 | 0.00141247 | 0.00146344 | 0.00151441 | 0.00156538 | 0.00161635 | 0.00166732 | 0.00171829 | 0.00196426 |            |            |            |            |            |            |            |            |            |            |            |   |
| L       | 0.00411037 | 0.00136150 | 0.00136150 | 0.00141247 | 0.00146344 | 0.00151441 | 0.00156538 | 0.00161635 | 0.00166732 | 0.00171829 | 0.00196426 |            |            |            |            |            |            |            |            |            |            |   |
| M       | 0.00440339 | 0.00131053 | 0.00131053 | 0.00136150 | 0.00141247 | 0.00146344 | 0.00151441 | 0.00156538 | 0.00161635 | 0.00166732 | 0.00171829 | 0.00196426 |            |            |            |            |            |            |            |            |            |   |
| N       | 0.00469641 | 0.00125956 | 0.00125956 | 0.00131053 | 0.00136150 | 0.00141247 | 0.00146344 | 0.00151441 | 0.00156538 | 0.00161635 | 0.00166732 | 0.00171829 | 0.00196426 |            |            |            |            |            |            |            |            |   |
| O       | 0.00498943 | 0.00120859 | 0.00120859 | 0.00125956 | 0.00131053 | 0.00136150 | 0.00141247 | 0.00146344 | 0.00151441 | 0.00156538 | 0.00161635 | 0.00166732 | 0.00171829 | 0.00196426 |            |            |            |            |            |            |            |   |
| P       | 0.00528245 | 0.00115762 | 0.00115762 | 0.00120859 | 0.00125956 | 0.00131053 | 0.00136150 | 0.00141247 | 0.00146344 | 0.00151441 | 0.00156538 | 0.00161635 | 0.00166732 | 0.00171829 | 0.00196426 |            |            |            |            |            |            |   |
| Q       | 0.00557547 | 0.00110665 | 0.00110665 | 0.00115762 | 0.00120859 | 0.00125956 | 0.00131053 | 0.00136150 | 0.00141247 | 0.00146344 | 0.00151441 | 0.00156538 | 0.00161635 | 0.00166732 | 0.00171829 | 0.00196426 |            |            |            |            |            |   |
| R       | 0.00586849 | 0.00105568 | 0.00105568 | 0.00110665 | 0.00115762 | 0.00120859 | 0.00125956 | 0.00131053 | 0.00136150 | 0.00141247 | 0.00146344 | 0.00151441 | 0.00156538 | 0.00161635 | 0.00166732 | 0.00171829 | 0.00196426 |            |            |            |            |   |
| S       | 0.00616151 | 0.00100471 | 0.00100471 | 0.00105568 | 0.00110665 | 0.00115762 | 0.00120859 | 0.00125956 | 0.00131053 | 0.00136150 | 0.00141247 | 0.00146344 | 0.00151441 | 0.00156538 | 0.00161635 | 0.00166732 | 0.00171829 | 0.00196426 |            |            |            |   |
| T       | 0.00645453 | 0.00095374 | 0.00095374 | 0.00100471 | 0.00105568 | 0.00110665 | 0.00115762 | 0.00120859 | 0.00125956 | 0.00131053 | 0.00136150 | 0.00141247 | 0.00146344 | 0.00151441 | 0.00156538 | 0.00161635 | 0.00166732 | 0.00171829 | 0.00196426 |            |            |   |
| U       | 0.00674755 | 0.00090277 | 0.00090277 | 0.00095374 | 0.00100471 | 0.00105568 | 0.00110665 | 0.00115762 | 0.00120859 | 0.00125956 | 0.00131053 | 0.00136150 | 0.00141247 | 0.00146344 | 0.00151441 | 0.00156538 | 0.00161635 | 0.00166732 | 0.00171829 | 0.00196426 |            |   |
| V       | 0.00704057 | 0.00085180 | 0.00085180 | 0.00090277 | 0.00095374 | 0.00100471 | 0.00105568 | 0.00110665 | 0.00115762 | 0.00120859 | 0.00125956 | 0.00131053 | 0.00136150 | 0.00141247 | 0.00146344 | 0.00151441 | 0.00156538 | 0.00161635 | 0.00166732 | 0.00171829 | 0.00196426 |   |



|   | H1         |            | H2         |            | H3         |            | H4         |            | H5         |            | H6         |            | H7         |            | H8         |            | H9         |            | H10        |            | H11        |            | H12        |            | H13        |            | H14        |            | H15        |            | H16        |            | H17        |            | H18        |            | H19        |            | H20        |            | H21        |            | H22        |            | H23        |            | H24        |            | H25        |            | H26        |            | H27        |            | H28        |            | H29        |            | H30        |            | H31        |            | H32        |            | H33        |            | H34        |            | H35        |            | H36        |            | H37        |            | H38        |            | H39        |            | H40        |            | H41        |            | H42        |            | H43        |            | H44        |            | H45        |            | H46        |            | H47        |            | H48        |            | H49        |            | H50        |            | H51        |            | H52        |            | H53        |            | H54        |            | H55        |            | H56        |            | H57        |            | H58        |            | H59        |            | H60        |            | H61        |            | H62        |            | H63        |            | H64        |            | H65        |            | H66        |            | H67        |            | H68        |            | H69        |            | H70        |            | H71        |            | H72        |            | H73        |            | H74        |            | H75        |            | H76        |            | H77        |            | H78        |            | H79        |            | H80        |            | H81        |            | H82        |            | H83        |            | H84        |            | H85        |            | H86        |            | H87        |            | H88        |            | H89        |            | H90        |            | H91        |            | H92        |            | H93        |            | H94        |            | H95        |            | H96        |            | H97        |            | H98        |            | H99        |            | H100       |            | H101       |            | H102       |            | H103       |            | H104       |            | H105       |            | H106       |            | H107       |            | H108       |            | H109       |            | H110       |            | H111       |            | H112       |            | H113       |            | H114       |            | H115       |            | H116       |            | H117       |            | H118       |            | H119       |            | H120       |            | H121       |            | H122       |            | H123       |            | H124       |            | H125       |            | H126       |            | H127       |            | H128       |            | H129       |            | H130       |            | H131       |            | H132       |            | H133       |            | H134       |            | H135       |            | H136       |            | H137       |            | H138       |            | H139       |            | H140       |            | H141       |            | H142       |            | H143       |            | H144       |            | H145       |            | H146       |            | H147       |            | H148       |            | H149       |            | H150       |            | H151       |            | H152       |            | H153       |            | H154       |            | H155       |            | H156       |            | H157       |            | H158       |            | H159       |            | H160       |            | H161       |            | H162       |            | H163       |            | H164       |            | H165       |            | H166       |            | H167       |            | H168       |            | H169       |            | H170       |            | H171       |            | H172       |            | H173       |            | H174       |            | H175       |            | H176       |            | H177       |            | H178       |            | H179       |            | H180       |            | H181       |            | H182       |            | H183       |            | H184       |            | H185       |            | H186       |            | H187       |            | H188       |            | H189       |            | H190       |            | H191       |            | H192       |            | H193       |            | H194       |              | H195 |  | H196 |  | H197 |  | H198 |  | H199 |  | H200 |  |
|---|------------|------------|------------|------------|------------|------------|------------|------------|------------|------------|------------|------------|------------|------------|------------|------------|------------|------------|------------|------------|------------|------------|------------|------------|------------|------------|------------|------------|------------|------------|------------|------------|------------|------------|------------|------------|------------|------------|------------|------------|------------|------------|------------|------------|------------|------------|------------|------------|------------|------------|------------|------------|------------|------------|------------|------------|------------|------------|------------|------------|------------|------------|------------|------------|------------|------------|------------|------------|------------|------------|------------|------------|------------|------------|------------|------------|------------|------------|------------|------------|------------|------------|------------|------------|------------|------------|------------|------------|------------|------------|------------|------------|------------|------------|------------|------------|------------|------------|------------|------------|------------|------------|------------|------------|------------|------------|------------|------------|------------|------------|------------|------------|------------|------------|------------|------------|------------|------------|------------|------------|------------|------------|------------|------------|------------|------------|------------|------------|------------|------------|------------|------------|------------|------------|------------|------------|------------|------------|------------|------------|------------|------------|------------|------------|------------|------------|------------|------------|------------|------------|------------|------------|------------|------------|------------|------------|------------|------------|------------|------------|------------|------------|------------|------------|------------|------------|------------|------------|------------|------------|------------|------------|------------|------------|------------|------------|------------|------------|------------|------------|------------|------------|------------|------------|------------|------------|------------|------------|------------|------------|------------|------------|------------|------------|------------|------------|------------|------------|------------|------------|------------|------------|------------|------------|------------|------------|------------|------------|------------|------------|------------|------------|------------|------------|------------|------------|------------|------------|------------|------------|------------|------------|------------|------------|------------|------------|------------|------------|------------|------------|------------|------------|------------|------------|------------|------------|------------|------------|------------|------------|------------|------------|------------|------------|------------|------------|------------|------------|------------|------------|------------|------------|------------|------------|------------|------------|------------|------------|------------|------------|------------|------------|------------|------------|------------|------------|------------|------------|------------|------------|------------|------------|------------|------------|------------|------------|------------|------------|------------|------------|------------|------------|------------|------------|------------|------------|------------|------------|------------|------------|------------|------------|------------|------------|------------|------------|------------|------------|------------|------------|------------|------------|------------|------------|------------|------------|------------|------------|------------|------------|------------|------------|------------|------------|------------|------------|------------|------------|------------|------------|------------|------------|------------|------------|------------|------------|------------|------------|------------|------------|------------|------------|------------|------------|------------|------------|------------|------------|------------|------------|------------|------------|------------|------------|------------|------------|------------|------------|------------|------------|------------|------------|------------|------------|------------|------------|------------|------------|------------|------------|------------|------------|------------|------------|------------|------------|------------|------------|------------|------------|------------|------------|------------|------------|------------|------------|------------|------------|------------|------------|------------|------------|------------|------------|------------|------------|------------|--------------|------|--|------|--|------|--|------|--|------|--|------|--|
| A | 0.00041367 | 0.00070174 | 0.00023253 | 0.00041917 | 0.00040061 | 0.00041367 | 0.00040061 | 0.00041367 | 0.00040061 | 0.00041367 | 0.00040061 | 0.00041367 | 0.00040061 | 0.00041367 | 0.00040061 | 0.00041367 | 0.00040061 | 0.00041367 | 0.00040061 | 0.00041367 | 0.00040061 | 0.00041367 | 0.00040061 | 0.00041367 | 0.00040061 | 0.00041367 | 0.00040061 | 0.00041367 | 0.00040061 | 0.00041367 | 0.00040061 | 0.00041367 | 0.00040061 | 0.00041367 | 0.00040061 | 0.00041367 | 0.00040061 | 0.00041367 | 0.00040061 | 0.00041367 | 0.00040061 | 0.00041367 | 0.00040061 | 0.00041367 | 0.00040061 | 0.00041367 | 0.00040061 | 0.00041367 | 0.00040061 | 0.00041367 | 0.00040061 | 0.00041367 | 0.00040061 | 0.00041367 | 0.00040061 | 0.00041367 | 0.00040061 | 0.00041367 | 0.00040061 | 0.00041367 | 0.00040061 | 0.00041367 | 0.00040061 | 0.00041367 | 0.00040061 | 0.00041367 | 0.00040061 | 0.00041367 | 0.00040061 | 0.00041367 | 0.00040061 | 0.00041367 | 0.00040061 | 0.00041367 | 0.00040061 | 0.00041367 | 0.00040061 | 0.00041367 | 0.00040061 | 0.00041367 | 0.00040061 | 0.00041367 | 0.00040061 | 0.00041367 | 0.00040061 | 0.00041367 | 0.00040061 | 0.00041367 | 0.00040061 | 0.00041367 | 0.00040061 | 0.00041367 | 0.00040061 | 0.00041367 | 0.00040061 | 0.00041367 | 0.00040061 | 0.00041367 | 0.00040061 | 0.00041367 | 0.00040061 | 0.00041367 | 0.00040061 | 0.00041367 | 0.00040061 | 0.00041367 | 0.00040061 | 0.00041367 | 0.00040061 | 0.00041367 | 0.00040061 | 0.00041367 | 0.00040061 | 0.00041367 | 0.00040061 | 0.00041367 | 0.00040061 | 0.00041367 | 0.00040061 | 0.00041367 | 0.00040061 | 0.00041367 | 0.00040061 | 0.00041367 | 0.00040061 | 0.00041367 | 0.00040061 | 0.00041367 | 0.00040061 | 0.00041367 | 0.00040061 | 0.00041367 | 0.00040061 | 0.00041367 | 0.00040061 | 0.00041367 | 0.00040061 | 0.00041367 | 0.00040061 | 0.00041367 | 0.00040061 | 0.00041367 | 0.00040061 | 0.00041367 | 0.00040061 | 0.00041367 | 0.00040061 | 0.00041367 | 0.00040061 | 0.00041367 | 0.00040061 | 0.00041367 | 0.00040061 | 0.00041367 | 0.00040061 | 0.00041367 | 0.00040061 | 0.00041367 | 0.00040061 | 0.00041367 | 0.00040061 | 0.00041367 | 0.00040061 | 0.00041367 | 0.00040061 | 0.00041367 | 0.00040061 | 0.00041367 | 0.00040061 | 0.00041367 | 0.00040061 | 0.00041367 | 0.00040061 | 0.00041367 | 0.00040061 | 0.00041367 | 0.00040061 | 0.00041367 | 0.00040061 | 0.00041367 | 0.00040061 | 0.00041367 | 0.00040061 | 0.00041367 | 0.00040061 | 0.00041367 | 0.00040061 | 0.00041367 | 0.00040061 | 0.00041367 | 0.00040061 | 0.00041367 | 0.00040061 | 0.00041367 | 0.00040061 | 0.00041367 | 0.00040061 | 0.00041367 | 0.00040061 | 0.00041367 | 0.00040061 | 0.00041367 | 0.00040061 | 0.00041367 | 0.00040061 | 0.00041367 | 0.00040061 | 0.00041367 | 0.00040061 | 0.00041367 | 0.00040061 | 0.00041367 | 0.00040061 | 0.00041367 | 0.00040061 | 0.00041367 | 0.00040061 | 0.00041367 | 0.00040061 | 0.00041367 | 0.00040061 | 0.00041367 | 0.00040061 | 0.00041367 | 0.00040061 | 0.00041367 | 0.00040061 | 0.00041367 | 0.00040061 | 0.00041367 | 0.00040061 | 0.00041367 | 0.00040061 | 0.00041367 | 0.00040061 | 0.00041367 | 0.00040061 | 0.00041367 | 0.00040061 | 0.00041367 | 0.00040061 | 0.00041367 | 0.00040061 | 0.00041367 | 0.00040061 | 0.00041367 | 0.00040061 | 0.00041367 | 0.00040061 | 0.00041367 | 0.00040061 | 0.00041367 | 0.00040061 | 0.00041367 | 0.00040061 | 0.00041367 | 0.00040061 | 0.00041367 | 0.00040061 | 0.00041367 | 0.00040061 | 0.00041367 | 0.00040061 | 0.00041367 | 0.00040061 | 0.00041367 | 0.00040061 | 0.00041367 | 0.00040061 | 0.00041367 | 0.00040061 | 0.00041367 | 0.00040061 | 0.00041367 | 0.00040061 | 0.00041367 | 0.00040061 | 0.00041367 | 0.00040061 | 0.00041367 | 0.00040061 | 0.00041367 | 0.00040061 | 0.00041367 | 0.00040061 | 0.00041367 | 0.00040061 | 0.00041367 | 0.00040061 | 0.00041367 | 0.00040061 | 0.00041367 | 0.00040061 | 0.00041367 | 0.00040061 | 0.00041367 | 0.00040061 | 0.00041367 | 0.00040061 | 0.00041367 | 0.00040061 | 0.00041367 | 0.00040061 | 0.00041367 | 0.00040061 | 0.00041367 | 0.00040061 | 0.00041367 | 0.00040061 | 0.00041367 | 0.00040061 | 0.00041367 | 0.00040061 | 0.00041367 | 0.00040061 | 0.00041367 | 0.00040061 | 0.00041367 | 0.00040061 | 0.00041367 | 0.00040061 | 0.00041367 | 0.00040061 | 0.00041367 | 0.00040061 | 0.00041367 | 0.00040061 | 0.00041367 | 0.00040061 | 0.00041367 | 0.00040061 | 0.00041367 | 0.00040061 | 0.00041367 | 0.00040061 | 0.00041367 | 0.00040061 | 0.00041367 | 0.00040061 | 0.00041367 | 0.00040061 | 0.00041367 | 0.00040061 | 0.00041367 | 0.00040061 | 0.00041367 | 0.00040061 | 0.00041367 | 0.00040061 | 0.00041367 | 0.00040061 | 0.00041367 | 0.00040061 | 0.00041367 | 0.00040061 | 0.00041367 | 0.00040061 | 0.00041367 | 0.00040061 | 0.00041367 | 0.00040061 | 0.00041367 | 0.00040061 | 0.00041367 | 0.00040061 | 0.00041367 | 0.00040061 | 0.00041367 | 0.00040061 | 0.00041367 | 0.00040061 | 0.00041367 | 0.00040061 | 0.00041367 | 0.00040061 | 0.00041367 | 0.00040061 | 0.00041367 | 0.00040061 | 0.00041367 | 0.00040061 | 0.00041367 | 0.00040061 | 0.00041367 | 0.00040061 | 0.00041367 | 0.00040061 | 0.00041367</ |      |  |      |  |      |  |      |  |      |  |      |  |
